# Supplementary material for: Secondary metabolites of Hülle cells mediate protection of fungal reproductive and overwintering structures against fungivorous animals
Source: eLife. 2021 Oct 12;10:e68058. doi: 10.7554/eLife.68058 (PMC8510581; doi:10.7554/eLife.68058)
Supplement: Figure 3—source data 1. [file elife-68058-fig3-data1.xlsx]

## Sheet: source data 1
	Fig. 3d: Hülle cells size after five days of sexual development
	Hülle cell diameter/ µm
	wt		∆mdpG		∆mdpF		∆mdpC		∆mdpL		∆mdpD		∆xptA		∆xptB		∆xptC
	18.51		12.11		22.18		14.05		10.85		11.52		16.93		15.18		19.24
	16.63		16.9		14.98		12.19		12.93		16.91		15.53		14.11		19.88
	20.36		20.7		21.93		10.6		10.66		16.98		18.4		10.21		12.39
	19.46		18.78		15.98		11.36		11.6		14.3		15.87		14.98		15.92
	18.17		14.83		16.75		14.63		10.92		11.74		18.29		18.28		14.6
	16.83		17.25		19.73		13.14		13.23		12.22		12.59		11.66		18.11
	13.35		15.92		19.57		15.11		8.65		13.81		9.98		16.07		16.09
	16.69		12.6		17.01		11.31		11.58		14.33		12.27		11.8		13.96
	19.64		17.54		13.77		11.61		10.52		11.64		18.15		13.82		15.11
	15.63		14.82		21.22		14.16		10.3		18.68		15.02		11.07		15.84
	14.41		13.58		14.37		14.35		11.27		12.49		20.59		18.03		13.72
	15.51		19.78		17.81		13.83		14.37		11.94		16.57		16.26		14.21
	15.96		16.35		15.56		11.76		12.13		18.57		20.5		11.78		16.8
	18.42		17.75		15.92		9.98		9.78		12.02		10.74		17.75		17.91
	15.22		17.61		18.07		15.22		13.28		9.7		13.74		16.88		15.59
	16.59		17.89		20		9.47		13.7		9.6		13.62		12.6		15.42
	16.93		16.32		18.69		15.48		14.37		12.45		17.22		16.25		16.65
	20.36		20.97		20.52		15.02		12.56		11.06		12.78		10.95		20.88
	18.54		16.2		13.76		19.07		13.86		10.1		10.21		16.19		14.48
	17.75		18.75		15.27		11.53		16.25		14.03		16.19		13.18		13.47
	13.7		15.64		17.05		11.57		14.15		11.45		18.11		15.39		18.26
	13.14		18.22		19.88		10.49		14.33		17.61		16.39		10.46		16.91
	15.23		21.38		13.89		9.41		15.85		9.86		14.8		14.24		12.98
	17.59		15.18		12.99		13.77		19.52		11.81		19.52		14.21		14.12
	17.08		18.1		14.72		12.13		11.61		19.87		14.96		13.7		15.07
	17.65		16.42		15.95		13.4		10.74		12.3		14.81		16.86		17.51
	14.14		11.93		17.05		12.11		16.24		10.24		15.67		18.96		9.73
	18.37		14.15		16.97		13		11.54		15.85		19.23		14.1		18.82
	13.72		18.48		19.62		11.45		10.11		9.63		15.31		20.51		18.68
	16.31		16.87		14.86		10.84		13.26		13.58		10.9		11.24		21.02
	14.62		15.96		20.6		16.81		12.67		12.34		16.97		9.22		10.27
	17.82		17.25		16.06		9.81		11		9.92		13.54		12.02		13.22
	13.12		14.44		16.78		12.78		7.88		15.31		13.51		14.62		19.54
	14.27		17.26		19.37		12.91		11.55		18.43		14.61		20.5		17.57
	17.31		16.96		11.01		13.78		9.47		11.75		16.42		18.52		19.59
	19.53		14.35		21.12		12.27		15.07		10.78		13.42		15.53		18.22
	16.39		16.64		18.17		10.13		9.7		13.31		16.04		13.82		18.47
	21.16		18.38		17.72		13.45		11.5		11.09		16.61		11.17		16.76
	17.71		15.98		16.65		14.63		10.55		8.82		17.55		15.28		18.86
	15.27		13.8		16.39		11.31		12.8		12.53		18.03		14.62		20.73
	14.8		18.82		15.75		10.27		12.88		10.92		16.77		16.48		15.13
	16.26		16.79		16.42		9.18		11.11		12.07		15.21		14.89		16.42
	21.39		15.64		14.82		12.78		11.81		14.03		11.56		11.79		18.74
	14.62		18.47		17.31		12.96		11.85		13.58		14.69		13.93		15.6
	17.06		20.06		18.36		12.19		12.32		11.43		15.16		13.28		17.29
	16.46		18.66		14.05		11.21		11.17		10.07		15.07		18.77		19.17
	14.55		14.96		17.11		10.43		11.43		12.11		11.89		21.54		14.88
	20.08		11.26		16.75		19.05		10.1		13.34		15.49		20.05		18.81
	16.66		15.55		20.9		14.34		13.94		11.84		12.81		11.87		15.05
	18.37		11.81		14.13		16.7		9.94		8.24		14.56		14.67		14.6
	15.54		20		16.23		12.13		12.52		12.52		13.35		19.69		12.65
	14.24		16.97		13.81		10.24		15.71		10.75		12.34		16.75		17.89
	20.38		15.45		13.68		15.25		10.35		11.4		15.6		13.35		17.81
	13.4		16.26		14.84		10.96		10.87		10.31		13.86		13.65		17.07
	17.04		15.39		17.89		13.23		15.94		12.17		13.53		14.27		14.63
	18.25		13.64		20.7		8.53		11.79		14.03		14.6		16.32		17.08
	17.46		16.9		16.8		14.86		13.4		14.67		15.31		17.37		12.59
	21.22		17.82		24.11		11.36		10.1		11.02		13.4		15.81		15.44
	21.25		13.69		16.83		13.34		11.97		14.55		13.47		13.89		20.15
	18.33		14.48		18.42		9.15		10.45		9.25		17.42		11.77		17.39
	15.41		17.19		19.4		11.17		10.34		13.64		10.23		15.76		16.12
	17.67		13.53		15.18		13.32		13.29		14.6		13.93		12.68		18.79
	20.03		15.37		17.05		12.56		12.32		12.26		18.32		14.38		18.34
	17.22		17.42		16.32		14.1		12.55		16.41		14.94		12.74		14.11
	19.89		22.18		23.26		11.86		15.84		12.38		11.77		13.62		16.45
	11.54		13.83		13.68		13.61		13.66		14.09		16.61		14.95		15.42
	17.1		12.62		17.88		12.37		10.25		14.69		14.27		12.88		13.38
	19.25		17.18		14.37		14.88		14.84		13.37		17.34		11.31		17.09
	16.61		14.65		17.43		14.42		14.62		12.33		13.44		14.29		23.87
	18.68		15.98		14.47		17.19		14.92		12.13		16.57		14.79		15.39
	15.64		14.44		10.26		18.51		15.22		10.02		12.01		18.72		19.4
	15.14		18.95		19.81		11.02		11.13		13.3		14.45		14.37		14.75
	15.73		16.61		20.8		15.89		12.62		11.04		16.37		19.61		20.47
	16.74		16.42		12.8		11.68		18.69		12.36		15.39		17.2		19.79
	15.98		11.58		21.82		13.88		11.89		14.9		12		16.2		9.63
	18.89		16.75		21.5		9.92		11.54		14.47		21.63		13.15		18.89
	15.78		17.01		18.98		11.97		10.45		10.1		16.07		11.33		20.82
	13.71		9.96		23.2		10.22		12.22		10.26		13.48		15.23		13.43
	18.67		18.25		18.06		9.83		13.82		13.8		20.7		14.43		20.5
	20.02		14.27		18.57		10.79		16.72		11.54		17.25		15.4		18.16
	22.41		18.55		17.76		17.04		13.69		10.96		13.32		9.12		15.05
	14.87		17.44		17.99		10.86		16.65		13.76		20.27		12.16		10.02
	14.27		16.35		15.89		12.46		17.44		13.35		10.76		13.26		20.06
	15.68		19.16		16.52		18.18		8.35		10.94		18.14		11.8		19.94
	17.92		16.2		20.86		19.37		11.45		14.16		10.87		9.93		16.57
	16.47		12.58		21.98		10.05		11.85		11.06		21.19		16.35		20.9
	13.31		13.42		16.35		12.68		14.5		15.53		16.31		13.83		19.35
	18.42		17.95		17.29		11.31		9.59		15.1		15.47		17.99		10.35
	17.32		9.94		11.65		9.23		9.41		16.72		14.6		17		18.78
	18.72		14.26		12.3		14.8		12.8		15.76		17.82		13.83		12.67
	14.52		17.51		16.33		13.42		10.88		10.93		14.35		18.67		18.46
	19.44		20.64		14.08		8.66		10.56		14.09		13.95		16.1		13.43
	16.73		14.38		21.11		11.87		13.58		12.27		10.68		16.87		20.9
	13.81		11.8		14.56		12.9		12.72		14.88		15.68		19.17		18.18
	14.86		15.27		14.4		9.23		13.43		12.34		16.69		13.97		13.38
	17.1		13.19		15.63		12.64		13.12		23.17		16.41		13.76		15.53
	19.2		15.59		19.32		16.18		9.51		18.33		10.09		11.31		16.73
	15.81		19.13		15.21		14.4		11.38		12.32		21.53		14.35		14.96
	14.38		17.13		19.37		11.5		13.34		17.56		13.12		14.87		15.84
	14.88		17.09		18.82		6.46		11.87		12.22		13.61		14.5		17.98
	19.69		14.41		13.16		11.43		11.64		8.87		10.18		18.4		16.85
	20.77		19.33		17.4		14.2		12.92		10.66		17.77		13.89		20.03
	16.62		21.45		13.73		14.28		11.97		11.59		19.91		11.91		17.27
	16.87		16.63		17.35		12.03		12.64		8.59		17.06		9.4		16.52
	19.03		19.14		21.82		12.45		13.95		15.1		17.05		19.4		15.66
	13.96		22.5		15.82		10.53		10.83		17.54		16.95		15.72		11.53
	16.65		18.24		18.57		8.97		11.71		17.99		19.49		13.07		18.02
	15.23		12.42		18.81		11.99		14.15		9.39		12.11		14.6		16.53
	17.47		18.94		21.43		12.6		11.84		11.5		18.68		15.15		15.82
	13.25		20.38		14.96		13.11		15.33		11.35		15.65		12.76		20.01
	17.25		18.3		14.56		14.65		11.67		19.13		10.71		15.84		18.13
	15.44		19.74		16.61		14.82		10.18		11.77		16.44		14.96		19.01
	19.19		18.56		13.76		12.07		13.31		13.76		14.39		18.04		14.86
	22.04		20.25		18.78		8.29		13.18		20.03		11.09		14.96		15.07
	17.82		14.37		20.5		9.91		15.14		15.53		12.45		13.89		20.47
	15.48		15.23		15.15		11.96		14.89		9.11		16.66		12.81		9.89
	15.3		18.17		15.92		13.14		15.26		12.17		13.92		16.47		14.98
	15.24		24.68		17.74		18.96		10.38		10.8		15.75		14.03		13.17
	18.67		18.56		19.71		17.92		11.85		11.39		13.45		13.78		19.4
	15.4		15.6		10.87		11.97		8.33		12		13.68		14.12		17.7
	16.66		17.31		12.98		11.11		10.9		12.87		15.04		17.95		18.27
	17.98		19.29		16.97		9.92		11.93		14.03		12.96		14.09		14.24
	16.35		24.98		19.28		13.58		12.78		12.9		16.56		15.23		8.24
	16.62		17.91		18.47		13.4		11.21		11.1		14.1		13.85		16.11
	19.03		20.4		11.97		11.01		12.11		18.98		16.45		10.07		17.85
	16.92		11.68		16.9		15.39		9.69		11.68		12.33		14.38		14.97
	15.39		12.74		15.54		12		11.23		11.67		14.26		10.76		16.66
	18.04		13.52		16.31		12.87		11.68		11.77		12.8		10.9		17.04
	12.32		22.08		15.67		9.86		12.17		10.08		13.92		9.76		18.77
	18.06		18.33		20.88		12.58		12.25		9.28		16.77		10.88		14.75
	16.14		20.01		19.44		15.48		9.56		12.11		13.35		12.22		18.46
	16.16		15.87		12.31		10.56		10.61		16.2		13.19		13.77		14.77
	18.77		15.1		18.57		11.04		11.87		20.52		15.2		18.05		13.68
	17.05		13.25		15.34		12.29		15.48		11.74		15.31		15.13		17.74
	15		21.97		16.18		12.8		14.67		10.89		12.15		14.08		14.16
	16.25		18.69		12.5		10.52		14.96		13.79		13.44		15.78		15.88
	17.47		18.06		17.6		15.64		15.4		13.4		12.03		21.11		16.32
	16.07		15.81		16.41		12.47		11.8		9.02		14.55		19.17		12.45
	21.72		19.95		17.86		12.78		10.99		12.19		13.23		17.61		15.48
	16.04		16.63		18.44		8.52		11.08		11.29		11.44		19.8		15.98
	20.02		19.12		14.71		13.24		15.04		11.49		16.85		17.57		17.05
	16.8		20.77		18.85		11.61		13.67		11.11		17.51		19.91		15.5
	12.9		20.13		18.75		13.94		13.46		13.28		12.38		12.96		18.49
	17.88		16.57		12.99		17.59		11.8		13.62		20.25		14.67		16.2
	17.22		14.24		18.73		12.65		10.6		15.2		17.56		16.78		19.93
	17.26		20.9		19.46		14.78		12.9		12.27		16.97		14.37		19.25
	16.97		15.75		14.8		7.81		10.85		14.35		11.87		13.7		15.62
	14.24		18.27		17.6		12.72		12.32		13.64		15.49		13.76		17.07
	18.58				16.22		13.45		9.67		13.86		16.61		16.42		16.8
	11.5				17.93		16.87		10.7		13.93		15.18		13.96		18.17
	16.65				17.47		10.32		12.96		16.68		12.75		13.35		14.69
	19.72				14.51		12.84		13.88		15.18		13.53		16.41		16.39
	15.16				14.86		14.44		11.04		16.25		15.52		16.25		15.97
	15.23				18.74		11.42		9.02		12.03		18.88		14.67		22.25
	17.64				16.98		11.25		12.99		12.96		11.7		15.95		12.25
	18.88				16.99		13.05		13.11		18		14.25		14.62		19.61
	16.64				18.93		20.47		12.32		15.23		18.13		16.23		12.85
	14.87				19.37		11.24		14.12		15.59		13.32		13.85		12.9
	19.24				13.58		11.88		11.64		15.67		16.69		13.89		18.06
	16.33				16.34		11.75		9.51		15.8		13.13		13.24		16.69
	18.99				20.51		11.55		10.55		13.14		13.17		14.3		20.54
	15.45				12.98		9.19		6.75		17.97		17.61		16.52		14.11
	15.27				12.74		11.35		11.56		13.04		12.45		12.9		16.69
	19.05				16.22		9.67		11		17.47		15.69		14.87		15.2
	20.59				13.17		11.76		12.9		14.64		15.67		15.47		19.48
	13.42				17.01		12.58		9.61		15.05		14.03		14.61		19.86
	14.52				21.85		14.02		12.47		11.26		11.11		13.52		16.18
	12.19				24.44		11.88		12.74		14.83		16		12.03		11.84
					19.46		13.11		14.78		9.87		12.56		15.51		13.74
					15.05		16.25		12.56		14.93		15.43		13.76		19.69
					17.43		12.9		7.82		11.02		16.86		15.53		15.27
					16.44		12.78		13.89		17.35		11.06		14.31		20.64
					11.77		14.75		11.7		14.53		12.16		11.71		15.43
					18.42		13.3		12.11		10.21		16.53		14.87		18.37
					16.66		15.18		9.05		16.93		14.75		11.32		19.07
					16.91		11.67		10.19		15.46		17.25		13.52		20.83
					18.46		11.54		10.43		13.01		11.55		13.02		18.21
					17.84		10.66		10.23		15.78		10.95		16.08
					13.17		11.53		12.8		9.95		16.1		15.92
					20.1		15.8		16.38		14.21		12.32		15.1
					18.08		9.85		14.48		12.32		13.12		11.23
					13.64		10.76		12.34		9.12		16.39		18.24
					13.16		13.12		11.5		11.39		15.03		12.79
					13.72		14.29		11.54		16.47		13.81		16.93
					18.08		8.44		14.2		15.78		15.85		12.78
					15.43		15.75		13.25		9.19		19.36		11.14
					16.35		14.32		10.19		12.55		11.86		16.82
					17.46		11.04		10.43		12.87		12.45		12.86
					16.42		18.52		13.99		12.03		13.4		12.96
							15		12.23		12.67		11.28		13.21
							14.5		11.55		14.29		18.12		21.1
							11.68		11.32		8.41		13.43		13.57
							13.12		9.28		14.69		16.06		10.81
							10.07		13.7		13.5		18.9		10.08
							10.21		11.76		15.44		14.25		14.27
							10.74		12		16.73		13.17		14.37
							13.24		11.41		9.63		16.63
							8.75		10.21		12.27		11.68
							12.83		13.23		14.84		15.47
							11.62		9.19		21.27		15.1
							20		12.82		11.34		12.42
							9.29		15.53		10.76		11.33
							12.35		12.65		11.77		16.37
							12.31		15.19		16.41		14.25
							12.17		14.41		11.53		18.47
							14.62		10.13		14.49		10.18
							8.62		11.36		12.88		15.95
							12.22		10.59		13.07		14.53
							10.25		11.1		12.65		13.67
							12.45		10.52		12.05		18.03
							13.6		12.39		12.47		15.6
							12		8.89		13.52		15.49
							11.33		12.02		13.14		14.1
							5.3		10.79		15.78		12.25
							15.08		13.94		12.42		9.99
							8.73		13.85		10.71		13.47
							12.51		14.95		10.12		11.56
							10.88		11.81		14.02		17.67
							10.43				19.37		12.35
							8.01				13.47		12.75
							11.68						15.28
							11.2						20.65
							12.9						14.15
							13.1						12.9
							14.47						11.33
							10.73						14.93
							10.02						13.7
							8.32						17.56
													13.8
													15.96
													17.1
													13.52
													15.02
													12
													13.71
													18.36
													18.08
													14.6
