# Supplementary material for: Secondary metabolites of Hülle cells mediate protection of fungal reproductive and overwintering structures against fungivorous animals
Source: eLife. 2021 Oct 12;10:e68058. doi: 10.7554/eLife.68058 (PMC8510581; doi:10.7554/eLife.68058)
Supplement: Figure 3—source data 2. [file elife-68058-fig3-data2.xlsx]

## Sheet: source data 2
	Fig. 3e: Germination rate of Hülle cells
		wt	∆mdpG	∆mdpC	∆mdpL
	Bio-rp1	22/40	15/40	4/40	1/40
	Bio-rp2	23/40	16/40	1/40	1/40
	5 days of detached Hülle cells
	Germinated / 40 placed Hülle cells
	2 biological replicates
