# Supplementary material for: Secondary metabolites of Hülle cells mediate protection of fungal reproductive and overwintering structures against fungivorous animals
Source: eLife. 2021 Oct 12;10:e68058. doi: 10.7554/eLife.68058 (PMC8510581; doi:10.7554/eLife.68058)
Supplement: Figure 5—figure supplement 2—source data 1. [file elife-68058-fig5-figsupp2-data1.xlsx]

## Sheet: source data 2
	Figure 5-supplement figure 2: Cleistothecia size after 25 days of sexual growth
	Cleistothecium diameter/ µm
	wt		∆mdpG		∆mdpF		∆mdpC		∆mdpL		∆mdpD		∆xptA		∆xptB		∆xptC
	136.29		107.34		129.52		47.73		83.55		117.36		117.36		62.48		132.9
	86.37		103.63		209.66		59.63		85.61		125.77		156.24		76.67		121.49
	115.86		125.77		93		158.45		117.36		167.66		151.71		75.62		167.66
	146.6		158.45		102.57		154.27		119.26		192.18		165.26		66.64		166.1
	136.56		176.48		88.61		83.9		73.97		155.45		150.95		151.09		169.73
	135.65		196.62		99.34		72.78		109.88		116.3		156.75		78.54		147
	159.55		99.34		150.32		78.54		91.59		110.74		147.94		56.63		119.62
	94.09		133.33		112.56		140.54		157.07		130.31		132.24		86.87		145.86
	68.15		177.79		143		90.31		75.14		86.95		192.3		63.4		105.09
	146.36		112.49		141.72		62.48		123.91		191.31		154.7		81.44		107.75
	49.67		139.87		147		67.83		73.28		133.06		80.36		94.32		97.57
	124.55		156.61		87.04		86.37		84.59		128.06		169.17		123.91		59.51
	136.4		187.02		119.01		76.19		99.7		130.03		138.67		145.81		183.17
	124.09		137.14		86.87		102.93		91.75		113.27		180.5		139.71		161.71
	107.28		111.07		160.77		115.17		91.75		91.59		162.74		95.47		135.01
	174.49		161.44		100		126.81		82.41		49.52		149.79		95.24		150.27
	156.33		156.89		132.24		184.44		106.73		38.85		129.75		71.88		150.27
	169.08		206.03		134.63		195.92		79.27		95.24		114.6		106.73		97.35
	136.56		146.56		208.17		150.13		114.6		99.7		140.07		100.65		129.75
	163.99		177.79		121.96		159.14		108.29		129.41		151.81		116.11		143
	197.66		187.6		124.79		87.04		119.32		150.13		147.94		78.54		183.49
	164.83		138.51		121.96		139.5		105.64		97.12		135.28		92.69		88.93
	118.65		203.62		102.93		67.83		76.19		141.72		111.07		84.33		86.37
	126.18		147.94		98.31		148.38		109.88		63.06		156.61		102.36		175.11
	159.55		149.01		104.05		67.83		167.79		161.98		141.16		118.65		126.63
	145.06		130.31		172.15		83.9		143.2		167.1		160.72		96.97		136.56
	140.49		159.55		51.25		183.89		92.77		135.12		170.11		126.81		138.04
	189.14		173.91		80.36		213.64		64.76		124.79		170.11		115.17		170.58
	171.22		177.26		171.09		93		109.09		138.51		161.67		81.79		89.67
	175.61		192.79		143.2		87.7		123.91		144.56		154.7		115.17		88.85
	140.49		143.15		117.36		70.86		84.59		128.06		169.9		104.61		140.49
	124.96		177.58		124.03		94.32		172.15		172.27		161.67		97.12		154.27
	143.76		133.39		118.34		133.33		107.34		143		123.09		124.96		125.77
	94.63		194.25		120.47		89.91		135.12		143.4		169.9		122.85		185.14
	105.92		156.38		219.8		78.16		88.85		126.63		162.43		96.97		176.48
	143.4		160.72		144.01		129.75		116.61		186.82		178.11		95.47		138.51
	169.73		177.79		146.01		62.83		78.54		143.4		83.55		115.86		190.82
	179.69		126.12		156.89		112.04		115.17		120.29		99.05		96.97		163.85
	203.09		43.44		171.43		137.35		144.81		120.47		129.75		70.04		107.34
	199.88		72.78		121.49		52.92		150.27		107.28		126.63		91.75		93.39
	164.34		64.65		175.4		128.91		88.93		141.72		121.96		132.24		142.79
	166.97		127.72		131.36		114.16		83.9		113.65		121.73		132.02		88.93
	121.49		143		141.72		148.77		75.62		148.77		147.94		130.03		114.54
	107.82		121.49		172.61		54.94		123.38		151.09		133.28		111.26		77.14
	62.01		209.52		143.76		83.9		97.57		144.01		143.45		142.79		178.11
	119.01		181.74		112.56		77.14		78.54		149.35		145.06		126.63		178.11
	147.94		166.1		89.91		128		80.36		110.48		141		41.21		174.49
	114.35		194.25		121.96		54.14		94.32		110.48		131.36		62.01		145.46
	126.18		160.05		167.01		53.87		137.62		107.34		179.09		66.53		164.52
	165.4		171.22		44.43		68.15		133.06		121.07		104.61		76.19		152.38
	168.74		170.75		135.65		37.52		99.34		176.15		121.49		57.14		171.22
	80.99		211.21		167.79		161.98		161.85		142.64		141.72		97.57		102.93
	58.02		148.38		110.74		148.38		130.03		158.59		126.63		67.83		145.46
	95.24		185.14		88.93		105.92		95.47		96.45		162.07		109.09		170.75
	165.4		177.26		127.32		62.01		139.87		180.98		94.63		87.7		175.61
	186.82		194.62		113.65		67.83		117.36		145.86		155.45		111.26		172.15
	114.16		92.77		148.62		118.65		86.95		137.62		118.34		75.14		170.37
	94.63		179.82		122.85		70.04		150.13		160.23		143.2		114.86		139.71
	124.96		176.11		167.66		138.51		77.7		184.32		155.45		137.35		165.26
	175.78		155.12		148.38		73.18		104.81		79.27		154.7		109.88		150.13
	160.18		197.58		153.76		56.25		122.68		162.07		145.21		115.86		171.43
	77.14		198.86		150.13		97.57		65.54		191.43		143.15		105.09		109.88
	88.93		179.09		103.63		113.27		101.44		129.58		110.48		83.55		153.76
	115.86		189.18		149.01		119.01		96.15		192.79		100.57		78.16		182.9
	131.36		136.56		78.16		64.76		146.6		109.15		118.16		92.06		121.25
	132.9		196.62		178.56		99.7		110.48		76.19		149.35		121.49		123.62
	174.07		138.67		130.03		138.04		153.24		97.35		172.1		113.65		194.58
	123.91		139.5		112.49		73.18		148.18		112.49		100.65		117.36		204.72
	199.34		179.69		148.38		53.87		127.32		157.07		106.73		76.19		113.27
	142.79		182.3		117.66		105.37		128.06		140.49		139.71		89.26		148.23
	148.18		197.58		138.09		32.77		109.15		83.55		140.07		120.47		160.18
	122.68		135.65		168.7		56.63		168.74		138.04		160.59		83.55		124.79
	137.35		164.34		90.55		87.7		120.47		166.1		143		106.73		145.86
	130.31		172.74		142.34		56.63		92.22		107.75		148.38		97.12		157.85
	71.88		120.47		163.99		51.82		109.15		132.68		136.4		89.91		137.35
	119.62		156.24		87.7		64.87		157.07		124.96		167.36		141.57		143.6
	151.66		136.4		113.65		204.19		88.93		109.09		83.55		126.18		175.11
	137.99		151.09		119.56		70.86		119.01		133.33		142.64		102.57		204.62
	138.67		143		114.29		75.14		132.02		140.07		124.03		56.63		160.59
	170.58		196.37		158.95		121.96		104.05		118.65		156.89		92.22		144.01
	156.93		204.72		158.54		153.57		120.47		97.12		154.27		62.01		194.02
	188.56		186.2		162.43		129.41		135.12		156.24		177.71		105.09		138.09
	104.81		141.72		206.17		92.06		75.42		173.16		143.2		94.63		154.13
	88.93		167.27		95.24		75.62		140.07		172.78		163.63		141.41		132.24
	220.2		98.83		181.46		204.8		122.68		105.85		144.81		80.81		102.5
	95.47		152.81		126.63		75.62		87.7		78.16		138.67		166.1		156.75
	175.9		186		176.76		51.82		121.25		95.24		141		67.4		130.31
	84.16		161.98		166.62		111.07		121.96		160.05		179.09		105.64		104.05
	144.01		151.09		122.97		54.94		90.87		142.79		156.61		83.55		100.57
	70.04		176.76		100		207.58		123.09		162.07		147.94		138.04		146.36
	154.37		205.15		148.57		198.68		97.57		136.56		131.36		129.41		145.06
	167.27		202.19		122.68		77.14		114.6		115.67		143.4		73.18		160.77
	117.66		73.97		150.71		69.93		51.82		131.58		148.18		96.15		125.77
	171.22		164.34		169.9		48.79		87.95		130.31		119.01		86.87		173.16
	112.04		137.62		110.74		83.64		129.75		153.76		148.18		75.14		144.81
	154.7		161.67		128		158.77		75.14		95.47		182.58		64.76		157.49
	53.06		161.98		134.69		115.86		94.32		167.1		105.37		110.48		123.09
	169.9		142.23		116.3		102.57		161.71		96.15		132.24		134.79		126.81
	45.87		91.75		124.38		67.4		118.65		94.63		153.24		107.82		85.61
	107.88		140.49		132.02		56.63		86.2		64.87		165.97		92.22		163.99
	118.65		170.58		172.74		83.55		133.06		110.74		157.72		142.64		163.99
	145.86		175.78		150.13		118.34		119.01		144.01		191.73		98.31		142.64
	80.81		228.7		148.77		224.28		79.27		158.95		90.55		164.83		139.87
	140.54		155.07		153.57		88.61		113.07		158.77		144.01		119.62		132.08
	83.9		186.82		180.98		123.62		108.42		189.25		195.92		102.57		160.05
	156.24		161.71		123.09		175.78		47.73		125.77		160.18		113.65		140.07
	80.36		124.96		119.62		120.47		109.95		146.56		80.99		72.48		66.53
	133.06		231.66		160.72		51.82		99.34		75.14		148.77		63.4		147
	148.18		157.07		148.38		52.92		99.05		108.96		131.08		124.96		154.7
	100.21		198.86		162.88		59.51		94.09		121.07		150.27		80.09		167.1
	127.78		161.62		231.91		86.87		157.72		101.44		139.71		45.87		201.04
	158.04		167.1		159.14		77.14		124.03		131.36		108.96		128.91		151.71
	128.06		194.62		150.71		59.51		118.65		70.24		133.28		69.52		64.87
	156.75		187.02		163.99		56.63		122.68		132.08		122.85		135.28		187.02
	142.79		169.9		119.32		68.68		117.66		164.47		148.38		121.01		127.78
	82.06		173.74		175.4		95.47		92.06		132.24		126.86		83.55		105.85
	144.81		165.57		166.97		111.26		150.95		117.66		78.54		99.05		105.09
	92.14		159.55		200.43		70.24		122.85		107.82		147.94		147		106.12
	133.06		168.01		86.95		76.19		87.7		173.49		150.71		87.7		151.66
	71.88		213.64		75.04		53.06		140.49		173.16		140.49		57.14		113.14
	68.68		197.55		151.71		48.19		118.52		95.92		171.22		83.9		156.38
	58.02		189.14		102.36		83.2		126.63		160.77		96.15		44.43		151.71
	144.81		75.62		141.72		62.83		128.91		132.08		51.25		108.29		143.2
	136.29		210.39		103.63		51.11		118.34		185.89		121.96		178.56		100.65
	153		163.05		134.2		132.24		118.52		175.28		128.06		113.07		79.27
	119.26		191.43		134.69		152.24		112.49		100.57		127.32		102.93		64.87
	112.56		128.06		119.01		52.92		100.57		129.75		153.76		53.87		152.38
	164.34		141.36		176.48		193.54		85.61		157.85		145.46		132.24		150.13
	133.28		153.57		88.93		72.28		109.88		136.4		90.87		59.51		135.65
	126.63		163.59		144.01		164.87		127.72		113.65		161.98		96.15		151.23
	119.01		133.82		137.41		171.13		78.16		133.77		144.81		147.94		140.49
	143.76		200.75		166.97		157.85		124.96		124.03		133.33		53.47		140.07
	211.32		165.4		135.12		94.32		105.37		142.79		83.64		49.52		167.36
	150.95		195.14		135.01		130.31		146.6		81.44		145.56		56.25		167.49
	141.57		145.56		141		56.25		113.14		187.44		145.06		67.83		129.58
	84.16		90.87		162.43		142.23		111.26		170.24		171.22		67.4		113.27
	158.59		148.23		156.38		92.22		118.65		117.36		145.46		117.6		169.17
	160.59		99.05		119.01		163.63		61.54		129.41		130.03		153.57		126.86
	97.57		132.24		69.93		57.14		139.71		175.49		136.4		138.04		129.75
	173.78		172.48		121.07		62.48		112.56		116.61		167.66		110.48		126.18
	137.2		133.33		112.04		160.77		139.5		164.34		186		136.4		95.24
	138.04		131.36		86.2		153.57		151.71		137.41		161.98		135.12		148.38
	188.64		182.9		164.83		210.39		95.24		139.5		124.38		140.07		175.78
	146.56		43.44		149.93		54.94		133.28		135.65		96.15		67.4		169.9
	158.95		181.74		132.24		107.82		129.58		156.38		145.56		83.9		105.85
	152.38		189.18		151.23		167.27		103.98		173.91		98.31		101.44		114.35
	184.28		122.68		63.4		91.59		104.05		154.7		123.91		121.07		127.78
	130.42		147		109.88		85.18		132.68		137.62		105.85		138.67		112.04
	115.17		169.17		97.12		92.14		98.31		165.97		112.04		117.36		103.63
	186.08		186.82		184.95		129.3		136.29		128.06		129.41		126.18		118.52
	189.48		124.96		138.09		149.01		115.67		167.27		105.09		139.71		83.55
	162.74		180.98		158.54		160.05		138.46		141		100		80.36		139.5
	134.69		159.55		161.67		121.07		127.72		174.07		176.11		83.64		159.14
	136.56		153.24		118.65		91.75		110.74		163.59		101.22		153		124.79
	70.24		181.1		105.37		75.14		111.26		148.77		191.43		113.07		44.43
	153.76		151.71		138.67		160.05		137.99		65.1		202.05		132.08		133.33
	121.96		170.75		142.79		116.11		94.63		88.93		145.81		119.62		161.98
	109.88		117.36		109.95		111.07		124.03		122.68		157.07		86.87		163.59
	119.01		115.86		119.56		115.86		89.91		144.56		161.98		78.54		91.75
	117.66		171.22		152.38		86.37		94.32		151.09		136.56		91.75		124.03
	177.71		128.06		143.4		71.57		144.81		118.52		175.11		89.91		129.58
	179.82		155.45		169.73		75.62		154.7		153.76		180.66		77.04		101.44
	152.38		91.75		165.26		41.03		141		136.56		136.13		126.63		118.34
	156.33		129.52		138.04		107.34		93.39		176.48		130.31		156.89		139.87
	160.05		156.38		137.41		189.79		118.16		191.43		147.94		82.24		68.15
	125.31		156.75		150.85		153.24		168.65		80.09		179.09		78.54		170.75
	142.79		211.83		138.04		87.7		72.78		176.72		67.83		118.34		156.33
	181.94		100		132.08		79.27		113.27		186.2		150.95		110.74		102.36
	126.63		89.18		102.5		111.26		157.49		115.3		134.69		105.85		180.66
	178.56		149.01		145.06		56.25		118.65		95.31		118.34		90.55		172.27
	140.07		161.71		153.76		180.7		119.01		112.04		128		95.54		115.86
	102.5		130.31		100.57		142.64		96.15		93		154.27		132.02		156.33
	194.02		124.38		117.6		148.18		93.39		119.56		159.55		101.65		88.93
	168.18		147.94		142.79		218.08		159.14		145.21		121.96		62.48		96.15
	109.95		172.48		183.49		180.7		123.91		132.9		166.97		99.34		158.54
	131.36		176.76		82.41		94.09		103.63		113.07		155.07		87.7		132.24
	141		133.06		119.62		147.94		135.12		133.06		99.7		116.61		134.63
	169.08		143.45		112.04		122.68		97.57		139.5		102.22		94.63		169.21
	85.61		116.61		147.94		180.5		110.48		140.07		143.76		111.26		111.26
	132.9		100		97.57		80.36		90.55		118.34		167.1		53.47		115.17
	68.68		153.33		160.18		118.34		99.7		157.07		137.35		119.32		133.06
	169.08		117.36		61.43		71.57		121.49		140.54		135.28		97.35		153.33
	133.98		134.63		122.68		105.09		91.75		138.04		167.36		140.07		132.02
	142.79		112.04		148.62		141.41		126.63		151.71		136.13		86.2		160.05
	78.44		209.21		169.9		188.64		139.5		144.81		129.58		138.51		78.54
	158.54		165.26		143		179.53		116.05		143.2		139.5		77.14		165.97
	177.71		124.79		97.12		91.75		114.29		83.9		121.49		99.05		105.09
	103.63		143.2		127.72		142.64		137.35		56.63		121.25		70.24		191.43
	113.27		193.12		177.79		107.55		156.38		153.76		159.14		147.05		124.38
	130.19		100		129.75		141.72		90.87		117.36		135.12		75.9		153.76
	123.91		68.68		167.01		145.86		54.14		113.27		134.69		143		177.26
	167.36		68.68		185.77		186.82		108.29		147.15		173.91		100.57		164.52
	153.33		103.63		81.79		119.62		99.7		92.14		141.72		83.9		162.74
	137.35		150.32		128		201.9		75.04		134.79		122.85		115.86		191.73
	169.17		150.71		150.27		54.14		149.01		191.27		133.33		54.54		156.38
	144.81		134.2		219.01		118.65		96.15		170.58		143		121.55		175.28
	90.87		173.28		101.65		115.17		99.7		129.41		34.07		134.69		169.73
	184.44		169.17		157.07		90.31		81.53		79.27		134.69		93.39		149.93
	195.81		180.98		156.75		80.36		132.68		126.81		130.31		119.62		163.99
	161.67		179.41		61.43		118.65		102.5		108.29		152.57		106.26		128.91
	125.77		187.6		58.02		140.18		94.32		145.56		141		78.54		192.79
	190.21		140.49		166.32		52.92		153.57		134.79		132.08		136.56		134.69
	108.35		124.96		174.45		154.27		95.47		145.81		145.81		63.06		167.36
	141.57		117.36		165.26		84.59		79.27		92.14		134.69		70.24		153.57
	95.24		126.23		135.28		97.35		121.49		156.89		134.2		106.73		167.1
	175.4		166.1		178.52		80.36		113.27		171.22		121.01		60.23		88.93
	136.29		70.24		172.48		156.61		73.57		122.68		122.68		80.72		177.26
	172.48		138.51		143.6		78.16		115.17		148.18		137.41		85.61		127.32
	147.05		157.85		157.72		42.59		170.24		76.19		163.05		64.76		154.13
	170.58		150.71		126.63		191.27		124.03		122.68		160.77		93		68.68
	197.58		130.42		156.61		110.74		151.71		113.27		138.51		125.31		153.24
	142.79		199.34		154.37		83.55		162.74		111.07		164.52		62.48		129.41
	149.93		176.76		155.45		66.53		112.49		102.57		153.76		136.56		97.12
	177.26		191.43		121.96		104.81		126.86		116.05		138.67		110.74		162.43
	150.13		223.24		140.49		61.43		90.55		177.21		135.28		130.31		185.77
	133.55		118.65		114.35		180.5		110.94		107.88		146.36		113.07		134.63
	92.14		148.38		150.27		194.02		124.38		127.78		147		116.3		126.63
	127.32		158.59		105.37		80.36		109.15		168.4		159.14		73.28		149.01
	188.18		183.89		105.37		132.02		172.48		144.01		179.09		97.12		148.38
	95.31		80.36		157.72		135.65		100.57		80.99		138.09		97.12		178.56
	138.67		144.81		81.53		137.62		93		125.94		117.36		127.32		121.55
	135.12		140.07		64.87		78.54		86.37		113.65		173.49		150.08		161.98
	117.6		105.37		75.9		92.22		105.92		138.67		83.9		75.9		124.38
	169.9		150.71		118.65		117.6		126.81		98.31		165.26		133.55		132.24
	129.52		102.93		145.06		81.79		105.85		182.42		124.38		72.78		151.09
	113.07		183.25		147.05		73.18		177.58		148.38		66.64		100.65		169.9
	155.49		186.82		84.59		89.91		71.17		119.56		141.77		79.27		146.36
	137.41		43.44		119.62		80.72		136.77		116.3		128		109.95		154.7
	157.85		167.36		148.23		134.2		141.72		151.71		86.87		121.96		157.72
	183.85		169.9		117.66		83.9		129.75		118.65		148.57		122.85		132.24
	159.14		188.87		159.5		30.71		147.05		122.44		138.04		83.64		113.27
	159.5		144.81		154.13		150.27		141.72		102.5		135.97		99.7		132.68
	124.79		138.04		116.61		88.93		128		176.76		156.19		108.29		181.46
	170.11		133.28		178.36		130.03		174.45		124.55		114.16		90.31		127.72
	128.51		203.94		144.01		250.88		119.01		73.18		102.57		128		146.36
	179.69		176.11		143.6		145.56		118.65		85.61		128.06		87.04		155.49
	140.49		141.57		175.49		156.33		81.79		126.86		160.05		112.56		159.18
	144.81		184.12		168.74		142.64		148.77		126.63		135.65		174.45		159.18
	162.21		179.82		171.43		97.65		77.14		80.72		133.33		167.27		178.56
	126.81		126.63		124.03		102.5		120.47		110.48		124.96		125.31		118.34
	108.29		186.82		110.74		69.93		94.09		96.97		156.24		144.01		124.38
	110.74		99.05		137.67		80.99		85.18		126.63		134.63		153.57		137.62
	135.01		162.43		106.26		129.41		114.6		118.52		150.85		75.04		139.03
	101.44		157.49		158.45		83.55		149.01		151.23		135.65		94.09		113.14
	176.11		162.07		184.32		70.04		86.87		134.69		142.64		45.87		192.79
	169.21		174.49		129.58		137.41		117.6		106.73		95.54		90.87		113.65
	121.49		216.61		111.07		176.11		100.57		72.78		106.73		122.85		103.63
	158.45		198.86		175.78		75.42		144.81		127.72		163.63		123.62		80.09
	164.83		173.78		163.59		129.75		54.94		169.9		179.69		126.18		141
	113.14		160.72		126.63		148.77		46.03		151.71		142.79		77.14		156.24
	46.03		132.08		149.35		126.18		105.92		150.71		135.65		80.72		140.07
	175.11		137.35		154.13		115.86		140.49		182.94		118.65		138.67		146.36
	171.43		162.74		143.6		131.08		124.38		148.18		148.38		87.04		170.58
	151.09		63.06		161.71		186		105.37		115.17		151.71		95.54		170.37
	150.95		184.28		140.54		150.95		97.35		86.37		145.06		75.14		142.79
	157.72		179.82		118.65		97.35		92.14		80.99		154.7		97.94		152.24
	173.16		189.79		151.09		120.47		54.54		177.79		154.7		77.7		118.65
	75.62		182.9		180.66		116.61		124.55		146.36		113.27		88.93		98.83
	150.95		160.72		175.61		112.11		96.15		141.77		132.24		126.63		175.28
	150.95				131.08		80.99		71.88		135.12		150.85		89.26		131.08
	158.59		96.15		83.55		73.97		110.74		104.81		109.15		100.65		140.18
	147.94		89.91		105.85		77.14		56.63		115.17		111.26		165.57		176.11
	195.48		98.83		155.07		67.5		110.48		122.85		124.03		140.07		151.71
	160.41		107.82		205.36		116.11		87.04		85.61		163.05		68.15		130.03
	73.18		101.44		199.74		84.59		124.96		80.09		111.07		157.72		106.26
	111.26		70.04		52.92		38.1		76.19		150.85		133.06		90.87		109.88
	148.38		116.11		123.38				88.61		100.65		160.05		156.33		197.29
	169.17		102.5		162.43		77.14		118.65		170.75		118.34		75.62		112.56
	123.62		121.25		157.72		71.17		99.05		157.07		141.72		124.96		150.08
	131.58		119.01		80.09		77.14		111.52		167.36		189.14		88.93		188.18
	164.34		100.57		131.58		70.24		144.01		141.57		135.65		203.19		178.52
	144.81		150.08		100.57		94.32		148.18		136.29		130.42		106.12		164.83
	157.72		138.51		129.75		100.57		167.1		131.19		151.71		75.9		163.63
	149.69		77.04		139.71		63.4		112.49		150.71		113.65		158.54		139.87
	91.59		124.03		177.26		73.28		105.92		105.85		163.05		160.72		147.05
	167.36		138.09		126.86		70.24		106.67		102.57		164.52		86.2		165.97
	118.28		170.75		169.9		88.93		148.38		78.54		117.6		118.34		115.86
	123.62		68.68		179.69		79.27		53.87		125.77		143		99.7		115.86
	96.37		69.93		176.11		86.95		106.73		187.02		156.61		62.83		98.31
	152.24		133.28		149.35		77.14		149.35		150.85		166.97		102.93		161.71
	165.4		100		132.02		64.76		160.72		112.56		146.56		86.2		183.85
	146.01		137.2		102.57		53.06		78.54		164.52		107.82		103.63		127.32
	94.32		144.56		149.69		54.54		164.83		129.52		93		100.57		119.56
	166.97		67.83		148.77		61.43		137.35		151.71		97.12		71.88		101.44
	100.65		149.93		129.52		97.57		147.94		147.05		168.4		157.07		154.13
	165.97		81.79		116.3		76.19		147.94		165.4		108.29		75.9		119.56
	177.21		103.14		141.77		54.54		175.49		129.52		166.97		58.02		135.12
	150.95		121.01		148.18		59.14		59.51		149.35		157.72		159.14		141.41
	138.09		129.75		179.09		63.86		107.88		152.24		93.7		99.05		149.4
	186.08		70.04		134.63		62.01		137.62		131.08		146.01		78.54		142.79
	140.54		118.28		141		181.74		129.75		122.85		137.62		86.37		172.4
	139.71		124.03		177.21		212.82		100.57		130.31		148.77		100		154.7
	131.58		169.21		168.01		104.61		86.95		99.7		143.15		94.63		163.05
	144.01		122.85		121.55		62.83		82.41		161.71		105.09		157.07		110.48
	179.82		177.58		176.76		65.54		100		153.24		151.71		124.38		159.55
	108.96		81.79		182.94		172.74		114.16		177.87		156.61		114.54		172.61
	118.65		123.62		151.23		48.79		136.29		138.51		152.38		132.02		135.65
	78.16		95.24		135.12		51.25		106.73		92.14		135.12		81.79		127.32
	145.46		100.65		162.74		90.55		96.15		150.27		167.27		63.4		191.43
	106.73		161.67		154.13		100.65		132.24		110.48		150.71		162.43		201.15
	116.61		97.35		109.15		49.67		113.27		101.44		126.23		60.23		182.1
	83.64		84.59		148.38		78.16		130.31		143.45		144.81		97.12		54.94
	107.75		145.06		181.1		54.14		97.12		97.35		134.2		86.95		165.4
	147.05		149.35		110.48		44.59		152.38		78.54		117.66		131.58		131.53
	165.57		155.12		141		57.14		121.49		110.74		144.81		110.74		106.26
	125.77		172.4		175.11		102.57		95.24		118.65		164.52		94.32		70.86
	172.74		150.71		164.34		48.49		78.54		91.75		149.35		114.16		113.65
	54.54		150.08		121.01		90.31		91.59		112.04		137.67		158.54		154.7
	164.52		86.87		161.62		88.61		65.1		120.47		137.41		58.02		170.37
	101.65		161.71		150.95		87.7		132.9		111.26		87.7		107.88		188.18
	140.49		173.28		194.62		35.94		112.56		108.29		88.93		177.71		99.34
	165.57		138.67		107.75		184.95		104.05		134.69		124.96		116.61		156.33
	172.61		142.79		124.03		54.14		110.48		138.51		84.33		136.4		172.4
	165.26		100.57		141.77		51.82		121.96		108.96		70.24		51.82		121.25
	100.86		153.57		181.46		202.19		89.18		90.55		156.33		65.54		87.7
	129.75		164.47		146.56		78.54		136.4		132.08		124.03		70.24		129.3
	56.25		109.09		124.96		39.77		130.19		107.82		153.38		130.19		116.61
	95.47		99.7		162.07		199.74		121.25		120.47		124.79		118.52		175.28
	139.71		126.18		183.25		67.4		91.75		127.32		159.14		105.92		168.4
	162.74		119.56		203.48		65.54		75.62		89.91		101.44		145.86
	161.71		132.9		150.13		45.87		95.47		129.58		145.46		132.02		106.73
	171.89		193.12		148.77		157.07		89.91		106.73		177.21		154.13		135.28
	124.03		128		112.56		80.99		145.56		123.91		156.24		142.34		128
	105.92		148.18		82.41		86.37		68.68		140.18		115.17		156.61		90.31
	132.08		94.32		110.74		77.14		102.93		122.68		113.07		170.37		157.85
	182.58		103.49		150.13		73.57		112.04		99.05		83.64		73.28		147.94
	145.06		102.22		134.69		46.5		78.16		193.95		132.02		124.38		133.98
	140.49		147.94		143		88.93		142.23		152.24		134.2		141.72		143.45
	102.57		152.24		138.67		62.48		128.06		127.78		150.95		142.64		117.36
	166.4		177.26		159.14		49.52		137.41		156.38		103.63		112.04		155.12
	162.43		121.96		179.69		54.54		123.62		123.91		130.19		104.05		163.05
	147		177.09		113.27		53.87		102.36		164.52		120.47		70.04		156.89
	131.36		184.28		134.69		58.15		140.54		83.64		119.01		164.87		147.94
	176.11		108.42		175.4		56.63		142.64		103.98		147.05		76.19		115.3
	110.74		118.65		67.4		83.55		179.69		126.63		151.09		139.76		116.3
	140.07		130.31		169.73		71.17		67.5		124.79		124.38		64.76		93.39
	188.22		158.95		119.62		96.45		73.18		76.67		111.26		75.04		71.88
	172.74		183.06		156.75		69.93		123.91		179.09		44.59		100.57		117.36
	154.27		151.23		169.08		107.82		111.26		197.99		165.57		77.7		93.39
	151.66		132.02		129.41		102.36		126.63		90.55		127.32		97.12		85.61
	170.75		152.38		208.17		115.86		101.44		161.98		127.32		38.1		88.61
	189.14		102.93		156.38		114.35		170.11		90.31		140.18		95.92		190.51
	102.57		113.65		73.97		171.43		110.74		141.57		144.01		133.98		141.77
	118.65		124.38		144.01		89.26		105.09		181.74		164.83		127.78		166.32
	136.29		128		176.27		121.55		167.36		126.81		102.5		125.77		64.76
	177.21		156.75		184.12		97.65		112.04		141.77		126.63		84.16		138.67
	146.6		143.6		146.6		226.15		83.64		99.05		140.49		121.96		145.56
	180.98		109.95		130.19		98.83		75.62		161.71		130.03		121.25		104.61
	204.19		184.79		108.29		48.49		86.2		50.11		150.95		78.16		122.68
	150.27		124.79		150.71		121.49		78.16		143.6		118.65		84.33		102.22
	142.79		118.16		54.54		165.97		111.07		157.49		145.06		107.34		68.68
	158.54		123.09		156.33		154.13		139.5		151.71		91.59		128.51		117.36
	172.27		73.97		78.16		81.44		134.63		152.38		118.65		119.56		193.95
	164.47		140.07		152.81		59.26		126.63		153.57		165.97		107.82		131.08
	135.12		170.37		117.6		75.04		94.32		135.97		100.57		96.97		107.82
	107.75		113.07		153.38		92.22		123.62		157.07		129.75		144.01		144.01
	111.07		113.27		146.36		113.27		118.65		159.14		164.34		94.63		162.74
	139.71		119.01		97.57		68.15		82.24		94.24		132.24		115.17		84.59
	165.05		140.54		121.96		70.24		144.01		148.62		96.97		135.12		187.02
	156.38		116.3		132.08		142.64		136.56		135.97		76.57		116.11		139.5
	117.36		186		114.29		88.93		184.95		120.47		119.62		147.05		137.62
	132.9		151.71		86.87		92.22		61.54		102.22		143.45		161.67		70.86
	141.77		151.23		110.48		66.64		132.02		168.4		118.34		112.56		166.97
	85.61		153.57		113.27		69.93		121.25		148.18		124.38		136.29		54.94
	73.18		161.98		195.81		78.44		97.65		132.02		156.24		121.96		177.79
	93.7		98.31		75.62		32.55		117.6		126.63		145.81		118.65		134.79
	63.86		100		146.56		111.07		143		114.86		148.18		124.38		150.08
	56.25		167.1		140.49		94.09		119.32		100		153.38		139.71		121.49
			110.48		146.36		76.19		158.95		113.65		146.56		129.58		128
			153.57		148.38		150.95		139.5		179.41		167.01		140.49		129.52
	128.06		136.29		56.25		135.97		106.12		152.24		114.29		106.73		165.4
	160.77		152.48		164.52		71.57		99.12		135.12		135.65		54.94		87.7
	96.15		138.04		161.71		109.15		126.63		151.23		102.36		119.62		122.68
	151.71		161.98		105.09		39.22		97.12		159.5		124.38		131.08		134.69
	151.71		147		160.18		83.9		92.77		159.14		164.34		99.34		122.85
	202.8		72.78		139.5		107.75		113.14		89.91		127.32		119.26		161.71
	82.06		161.85		176.48		104.61		145.56		164.83		160.72		77.14		140.07
	120.47		105.09		145.06		110.74		114.35		125.77		135.65		95.24		140.07
	145.81		79.27		144.01		80.09		148.38		151.71		72.78		148.38		147.94
	174.78		89.26		153.57		89.26		100		116.61		105.85		139.87		155.49
	150.71		175.4		190.21		72.78		100.57		81.44		116.3		115.86		148.23
	235.21		156.38		151.71		56.25		119.62		168.01		121.49		97.12		156.61
	144.81		171.43		171.22		64.87		115.17		144.01		136.56		133.06		130.03
	93.7		171.22		167.01		47.73		64.87		129.58		147.94		108.35		156.33
	151.23		141		145.81		51.82		134.69		113.27		148.77		71.17		58.15
	131.36		185.73		159.18		70.04		78.16		115.86		114.35		96.15		142.64
	161.98		145.06		121.25		83.9		94.63		88.85		160.72		153.76		188.56
	105.37		88.85		146.01		102.5		131.19		151.09		147.05		61.43		171.22
	170.37		159.5		156.33		64.87		154.13		123.38		172.48		138.51		129.52
	178.44		172.4		70.86		67.4		92.22		150.85		133.28		88.61		104.05
	156.75		165.4		153.24		78.44		105.92		190.82		164.52		65.76		154.13
	162.74		186.82		164.52		76.19		112.04		151.09		56.25		89.26		163.05
	144.81		173.74		129.41		88.93		94.09		180.98		91.75		124.38		155.45
	125.66		164.52		159.91		83.55		148.23		151.23		129.3		184.32		152.48
	143.6		153		108.29		91.75		75.04		125.31		190.21		34.07		115.17
	130.31		197.1		142.79		61.43		127.78		163.05		122.97		109.88		118.34
	160.05		158.77		124.96		91.59		130.03		168.7		151.81		101.44		184.44
	154.7		148.57		152.38		92.69		137.41		112.11		173.49		113.27		120.47
	122.97		143.15		169.21		148.38		108.42		138.51		148.57		64.87		118.34
	162.07		168.7		161.98		143		116.61		106.73		138.67		156.61		140.49
	145.06		143.4		188.22		98.9		90.87		136.56		145.81		128		151.71
	169.17		94.32		167.1		112.11		173.16		164.34		137.99		148.77		144.81
	173.28		140.18		121.25		124.38		49.52		168.01		138.46		110.48		152.57
	154.7		143.6		161.67		110.74		95.47		151.09		84.33		80.72		157.72
	153.57		150.08		145.06		70.24		156.61		164.34		105.09		94.63		179.69
	119.56		121.01		92.22		107.34		126.81		139.71		136.56		95.47		137.62
	126.18		127.32		120.47		148.77		137.35		149.35		132.68		115.17		142.64
	161.44		155.45		119.01		108.29		95.24		224.89		76.19		177.58		153.57
	145.56		148.18		89.26		86.37		126.12		204.8		133.06		125.77		121.55
	106.12		154.7		118.65		112.04		105.09		81.79		140.49		77.14		108.29
	117.6		143		76.67		57.14		96.15		160.72		130.92		154.09		159.09
	132.9		151.71				68.15		167.01		156.61		140.18		151.66		140.54
	149.93		82.41		104.61		117.66		100.57		131.53		166.97		161.71		167.1
	138.09		114.6		78.16		85.61		109.69		159.5		129.75		89.26		181.74
	138.04		123.62		140.07		172.27		47.73		150.95		61.43		116.55		157.49
	140.95		133.55		164.34		148.38		94.63		196.11		147.05		96.97		110.74
	183.85		78.54		115.86		114.16		124.38		178.11		92.22		160.18		67.83
	122.68		103.98		111.26		110.94		121.96		116.55		100		132.02		105.92
	168.65		154.27		136.4		83.55		119.01		143.6		109.69		82.41		130.03
	137.62		148.38		131.58		75.62		102.93		165.4				155.49		123.91
	143.6		112.56		161.62		71.88		117.36		140.49		74.85		148.38		99.34
	162.74		118.34		164.87		118.65		73.18		180.5		129.3		145.21		141.77
	194.25		137.99		164.83		102.93		129.41		129.41		140.49		159.55		134.63
	148.18		78.54		136.56		61.43		115.86		122.68		126.86		123.62		163.99
	129.41		113.27		137.35		102.93		96.15		162.74		169.17		122.68		154.7
	177.87		60.23		143		75.42		118.34		168.7		183.25		112.04		171.6
	153.57		140.49		140.07		55.47		151.23		129.41		139.5		101.65		165.4
	168.7		180.98		150.95		46.03		144.81		140.18		128.06		120.47		173.16
	152.57		68.68		152.24		113.27		118.65		100.65		122.68		162.74		161.71
	184.95		183.85		64.65		63.4		121.96		136.77		180.98		111.52		111.07
	177.71		140.18		86.37		58.02		115.86		151.09		129.75		119.01		138.04
	148.18		164.34		105.85		35.94		115.86		155.07		97.57		78.54		137.2
	172.15		167.79		101.44		109.88		141.57		142.64		141.77		119.01		157.85
	149.93		140.07		95.54		61.43		133.06		115.86		53.47		98.9		167.79
	151.66		126.81		155.07		114.29		140.07				143.2		158.59		148.38
	140.07		121.55		139.5		116.61		140.54		78.54		148.18		97.57		183.89
	128		134.79		160.72		145.81		54.54		119.62		88.61		127.78		163.05
	183.17		114.35		149.35		94.09		109.15		72.78		107.88		94.09		143.76
	179.09		163.85		121.01		83.55		131.08		94.24		137.35		152.38		169.73
	174.78		78.44		116.05		129.75		160.77		89.67		124.96		131.36		155.45
	204.62		131.08		108.35		110.48		100		169.73		197.8		102.5		132.08
	165.4		174.78		87.7		56.63		56.25		120.47		129.75		141.41		124.03
	151.71		133.39		140.54		78.54		84.59		158.45		104.81		100.21		162.74
	141.16		121.96		146.01		71.57		141.72		88.61		148.18		71.57		119.62
	141.41		120.47		99.7		59.51		167.1		107.34		53.06		107.75		170.24
	92.22		86.87		157.07		54.14		123.62		73.57		126.12		159.14		148.38
	157.07		84.59		115.86		107.82		100		83.9		100.86		132.24		75.04
	153.76		153.57		165.97		72.78		143.76		58.15		140.95		109.09		132.24
	175.61		83.9		86.37		127.32		145.56		82.41		68.15		99.34		107.34
	158.54		121.9		136.4		72.78		129.41		124.79		80.81		138.67		58.15
	100.57		88.85		137.41		144.81		115.86		121.01		125.77		123.62		127.32
	172.48		163.85		188.22		152.09		130.03		148.38		153		114.29		102.36
	116.61		182.3		131.19		119.56		118.34		44.43		144.01		88.93		117.36
	161.98		103.63		176.48		89.26		97.35		160.23		134.79		73.18		85.18
	97.12		132.08		122.68		108.96		133.39		125.77		138.04		129.58		83.64
	130.31		173.74		124.38		138.09		105.92		142.34		169.17		54.94		141.77
	161.67		84.59		109.69		64.76		114.6		93.7		148.77		79.55		192.79
	171.89		192.18		149.35		101.44		68.15		144.81		93		147.2		88.85
	180.66		142.34		140.07		92.14		149.01		141		122.68		118.16		85.18
	154.13		165.57		155.49		101.44		124.79		162.43		83.55		162.43		162.43
	172.61		105.92		143.76		158.95		116.05		80.99		115.17		80.99		86.2
	198.68		119.62		160.23		56.63		121.25		110.48		157.07		174.49		121.73
	171.22		121.96		71.88		160.41		128.91		137.35		126.12		91.75		117.36
	138.67		98.83		145.46		80.99		164.34		75.62		171.22		81.53		117.6
	177.09		96.15		128.06		148.38		116.3		32.32		124.96		127.32		123.09
	156.38		127.15		140.07		72.78		137.35		98.31		88.93		145.56		126.63
	185.38		142.34		83.64		87.7		132.51		132.02		145.06		85.18		91.75
	154.27		97.12		61.54		43.44		150.95		172.27		87.04		85.61		139.71
	106.26		124.55		189.14		62.01		70.24		162.74		77.04		112.49		111.07
	140.49		170.07		178.11		150.85		119.62		85.18		111.26		181.46		151.71
	87.95		151.09		105.92		105.92		134.79		57.14		140.18		62.48		147.94
	182.3		98.83		159.14		49.67		100.57		72.78		137.35		146.6		141.16
	110.74		125.94		151.66		71.57		112.04		103.63		169.17		131.36		159.14
	129.58		113.27		163.85		75.9		112.04		113.65		189.14		115.17		163.85
	124.38		66.53		177.79		89.67		104.61		22.21		95.47		94.32		99.05
	155.49		52.92		138.67		95.47		148.18		90.87		131.19		151.71		116.3
	191.27		134.79		153.76		68.68		122.68		122.68		92.22		116.61		110.48
	148.77		177.87		182.42		95.54		142.79		135.12		126.63		83.81		179.09
	182.42		134.69		146.01		54.94		124.79		82.41		76.19		109.88		178.56
	167.66		155.49		167.1		62.01		101.22		132.24		169.17		181.46		146.36
	67.83		85.18		170.24		67.4		124.38		133.06		150.08		126.18		170.75
	136.56		160.72		156.61		65.54		154.7		119.62		101.65		98.31		171.89
	145.21		125.77		151.23				95.24		98.9		132.9		87.7		140.07
	142.64		165.97		132.24		56.63		85.18		137.67		135.28		140.54		155.12
	134.69		170.11		138.04		83.9		132.24		165.05		160.77		121.25		150.85
	115.17		148.18		99.05		39.22		113.14		83.64		158.54		165.97		145.46
	143.76		198.42		163.85		127.32		123.62		150.71		122.68		129.58		175.4
	173.91		175.4		81.53		53.87		155.45		82.41		100.65		128.06		156.38
	148.18		155.12		112.56		35.94		129.41		100		124.79		108.42		158.95
	51.11		154.13		124.96		54.54		83.64		134.69		172.27		163.99		175.11
	124.38		177.58		144.01		43.1		105.37		92.77		58.02		151.66		156.61
	88.93		133.06		138.51		44.59		135.12		118.16		91.75		144.56		161.67
	138.04		78.44		157.07		32.77		155.49		133.06		132.02		121.07		124.38
	102.36		143.76		97.35		156.33		162.07		118.16		135.12		88.85		161.98
	105.85		127.72		149.35		184		173.16		136.29		116.61		119.56		114.29
	177.58		143		164.34		89.26		143.4		76.19		113.65		85.18		115.86
	193.42		93		112.49		176.76		67.83		109.69		171.22		51.25		115.86
	129.58		142.79		172.48		32.55		81.53		99.7		170.75		106.26		125.77
	131.08		129.52		155.07		45.87		58.02		155.49		180.66		58.15		107.75
	134.63		154.27		105.92		77.14		125.66		112.56		100.65		103.49		115.86
	123.62		121.01		159.55		32.77		124.79		144.81		134.2		134.63		107.75
	109.09		91.75		128.06		35.94		191.73		153		126.63		85.61		110.48
	102.57		138.67		139.5		69.93		127.32		141.41		53.47		136.13		192.18
	105.92		78.54		111.07		69.93		100.57		81.79		139.71		116.11		117.36
	75.14		97.57		180.06		51.25		77.14		101.65		153		117.36		110.48
	196.81		123.62		137.62		114.35		112.56		111.26		121.96		92.22		148.38
	156.61		97.12		126.63		103.63		187.02		135.12		106.26		78.54		92.77
	206.03		150.13		54.54		97.35		116.11		165.97		126.86		96.97		78.54
	163.99		135.28		151.71		47.73		75.62		130.31		175.4		103.63		101.44
	103.63		172.61		150.95		175.61		150.71		179.09		136.29		144.81		91.59
	154.09		147		145.86		124.38		143.2		121.73		146.36		113.14		160.23
	160.77		165.26		120.47		89.91		131.58		87.7		111.07		89.26		139.5
	172.15		168.31		132.68		50.83		132.24		116.55		107.75				161.98
	158.95		185.77		135.01		57.14		134.79		165.4		109.15		75.04		129.3
	158.95		178.52		167.1		83.9		145.21		139.5		100.86		115.86		123.09
	105.37		172.27		79.27		171.43		124.96		124.38		138.46		61.43		128.91
	126.81		140.54		101.44		62.01		135.12		103.98		112.04		73.97		115.86
	143.15		144.56		155.12		42.08		89.26		64.87		146.6		73.97		117.66
	174.49		138.67		162.74		236.96		136.56		102.5		147		114.29		79.27
	157.07		151.09		186		54.14		124.79		95.24		120.47		152.24		105.92
	164.87		150.95		155.12		99.7		70.86		178.52		168.4		76.19		81.79
	182.94		144.01		114.35		51.11		109.09		132.9		107.82		88.61		115.86
	175.61		105.09		173.74		60.23		115.86		211.28		125.77		139.5		127.32
	107.34		127.78		112.04		94.09		105.85		164.83		137.62		93.39		63.4
	131.08		133.39		155.07		35.94		162.74		83.55		138.51		80.81		82.06
	161.62		133.06		153.57		78.16		105.37		111.07		140.18		83.2		155.07
	143.4		134.2		174.49		167.1		109.69		126.18		151.71		101.44		78.54
	170.07		121.25		92.22		180.7		126.86		140.54		152.38		138.67		105.64
	179.09		124.96		161.98		195.48		114.29		160.05		178.11		93.39		64.87
	161.67		156.61		51.82		162.43		115.17		97.12		128		119.56		95.24
	112.49		138.04		103.98		135.65		85.61		30.71		109.15		93.7		91.75
	111.07		157.72		121.07		48.49		135.65		111.07		124.38		53.87		117.66
	148.62		123.62		128.91		82.24		82.41		133.06		64.76		141.72		109.88
	166.97		128.91		160.05		62.48		111.07		117.66		49.67		68.15		159.14
	161.62		134.69		131.36		97.57		126.12		162.43		92.06		105.37		54.14
	177.87		159.5		119.26		85.18		147.94		129.36		132.08		78.16		83.9
	100.65		152.38		168.01		164.83		81.79		108.96		86.87		107.75		99.7
	121.96		149.93		92.14		114.6		110.74		170.11		131.19		104.05		122.85
	180.66		175.11		185.77		97.12		122.68		122.68		127.72		106.67		131.08
	176.76		173.74		144.01		169.9		119.01		153.57		156.75		108.42		56.63
	144.56		163.85		129.58		64.87		126.63		126.81		119.26		83.55		135.12
	143.4		145.86		142.64		143.6		125.77		116.61		159.18		70.24		168.01
	109.88		172.27		167.01		80.99		150.08		170.24		114.16		73.97		143.45
	141.57		124.96		159.18		56.25		100		132.02		154.27		99.34		140.18
	169.21		158.95		150.27		59.63		153.57		141.72		97.65		130.31		133.82
	147		82.41		91.43		51.11		102.22		113.65		151.09		103.63		170.58
	136.13		136.56		164.87		38.1		110.48		154.13		167.79		86.37		155.45
	129.52		127.32		112.49		191.31		116.11		119.62		163.05		98.83		143.4
	177.09		118.65		164.34		118.52		112.49		108.29		138.09		105.37		148.57
	145.56		139.87		140.49		161.71		98.83		124.96		116.11		135.12		149.35
	121.49		138.67		148.18		119.01		145.06		92.14		119.62		118.28		151.66
	145.06		115.67		173.16		145.06		143.4		88.85		122.44		66.53		118.28
	170.58		75.14		140.07		42.59		143		148.18		153.57		56.25		144.56
	191.31		124.38		153.57		32.55		134.69		133.06		98.31		96.45		177.71
	178.56		80.72		158.59		126.81		160.05		137.35		135.97		105.92		139.71
	107.88		131.58		113.65		72.28		117.6		142.79		141.41		121.07		162.07
	143.2		105.37		96.37		67.4		53.06		183.49		75.62		80.09		167.1
	226.85		186.08		114.6		159.09		138.51		151.66		138.09		102.93		173.74
	155.45		161.71		150.85		166.97		81.53		170.11		109.15		121.07		148.18
	118.16		184.95		162.74		83.55		108.29		146.56		89.18		115.86		159.14
	166.1		161.67		114.35		135.65		89.67		114.29		119.01		124.79		134.79
	178.56		128.06		122.68		115.86		106.73		175.9		119.62		77.14		157.49
	195.48		116.05		87.7		60.23		121.9		120.47		153.57		119.26		148.18
	178.89		162.43		47.73		83.2		138.51		67.83		153.76		131.36		109.15
	137.35		163.99		153.33		117.66		126.86		115.17		118.34		107.28		151.66
	252.98		155.49		151.71		88.93		109.09		54.94		114.54		132.02		164.87
	126.12		140.18		173.74		133.33		119.56		140.07		153.57		53.87		164.83
	187.4		139.03		172.48		186.04		122.68		126.63		144.81		87.7		147.94
	158.77		131.36		166.97		100.57		162.43		154.27		128.06		94.32		179.53
	187.4		132.02		48.19		66.53		127.78		164.83		129.41		94.32		173.16
	158.59		161.62		134.69		62.48		117.6		140.54		149.4		138.67		153.57
	134.2		151.71		149.35		91.59		129.3		150.95		121.49		123.62		165.26
	152.38		150.13		171.13		35.94		113.14		144.81		127.32		132.24		183.89
	137.41		116.61		180.66		67.5		115.86		158.54		164.83		73.28		189.25
	111.26		117.66		153.24		97.12		150.85		153.57		108.29		105.09		190.51
	125.31		173.78		191.27		157.49		140.49		103.98		129.3		130.03		156.19
	113.14		128.06		94.32		60.23		162.07		185.89		160.77		129.3		166.97
	133.33		140.07		44.43		39.22		116.61		156.75		115.17		151.09		175.28
	109.88		141.77		121.07		49.52		64.87		151.23		102.57		112.04		180.62
	120.47		174.78		135.65		182.9				138.51		148.18		70.86		159.5
	170.58		105.85		140.49		58.02		70.24		109.88		121.9		105.92		117.66
	196.62		121.49		176.11		86.37		86.87		56.63		109.88		112.04		176.48
	164.87		83.55		35.94		60.23		91.59		149.35		135.12		91.59		162.07
	143.2		169.17		89.26		80.72		111.26		42.08		146.36		129.41		195.03
	115.86		80.36		139.71		86.95		130.31		114.35		116.61		82.24		140.49
	95.24		102.93		89.26		67.4		57.14		167.79		151.71		124.79		109.15
	136.77		144.01		147.94		60.23		68.68		154.13		169.73		85.61		42.59
	149.35		101.44		146.36		32.77		75.42		141.57		142.79		97.35		164.47
	145.06		100		191.31		134.69		105.09		132.02		54.94		136.4		148.57
	156.38		135.12		139.76		107.82		78.16		127.32		119.01		144.01		161.44
	114.35		189.25		173.16		119.62		123.62		80.72		30.71		107.82		177.58
	101.65		168.7		122.85		73.57		126.86		149.01		25.56		112.04		100
	117.66		149.01		167.79		93.7		68.68		142.23		151.71		94.09		109.69
	137.2		133.28		85.18		59.51		134.79		97.12		107.34		105.92		126.81
	157.49		127.32		32.77		64.87		80.81		165.97		83.9		130.31		77.14
	143		134.63		164.34		73.18		84.33		100.57		133.33		124.03		145.81
	183.25		138.67		153.33		127.78		109.09		134.79		75.14		114.16		83.9
	164.21		181.1		166.32		43.44		171.89		95.54		170.24		77.7		162.74
	148.77		131.58		181.46		62.48		85.18		80.09		167.01		138.67		115.17
	135.65		112.56		114.6		52.92		95.47		142.64		142.34		123.38		140.07
	177.26		145.06		162.74		139.03		92.14		172.48		131.36		115.67		111.07
	141.77		119.01		159.91		183.49		42.08		150.85		162.07		95.54		60.23
	124.96		138.04		145.06		77.14		136.56		118.52		162.43		106.26		118.65
	160.77		74.85		180.7		73.97		132.08		101.44		127.32		66.53		137.62
	146.6		156.61		190.51		54.94		94.32		121.96		148.18		104.05		131.08
	159.14		164.34		164.87		91.75		54.54		122.85		133.28		124.38		115.86
	134.63		99.7		130.19		140.18		85.61		153		124.38		128.06		110.74
	164.87		119.07		121.01		135.28		143.4		158.95		126.86		118.34		112.04
	137.35		140.07		56.25		65.54		68.99		118.34		168.01		154.7		132.68
	114.35		177.58		140.18		61.43		51.82		136.29		83.55		95.24		116.11
	91.75		142.79		141.57		83.55		107.82		155.4		119.62		49.67		89.91
	97.65		168.65		182.94		104.61		61.43		172.48		125.77		77.14		62.01
	94.32		79.27		165.4		107.88		98.83		132.08		125.77		77.04		146.36
	170.58		158.95		118.65		77.14		132.24		142.34		144.96		94.09		153.24
	142.64		143.76		168.18		179.09		44.59		116.05		122.68		85.61		192.75
	160.77		111.26		207.44		109.15		105.92		109.09		142.79		53.87		161.71
	157.07		169.21		159.5		98.31		92.22		123.38		155.45		68.68		139.87
	175.49		171.43		181.46		45.87		137.35		98.9		83.9		77.14		162.88
	139.71		156.33		114.6		81.53		105.92		94.63		180.98		126.63		161.44
	138.04		95.24		89.91		47.73		97.12		135.65		139.87		65.1		157.72
	155.63		132.08		132.68		80.36		92.69		92.77		108.96		137.41		168.74
	65.54		89.26		73.18		88.61		61.43		105.85		69.93		175.11		177.58
	95.24		130.03		153.76		62.01		52.92		126.86		191.73		102.22		137.67
	63.4		167.01		164.52		77.14		94.63		161.71		121.96		138.67		136.77
	126.63		145.86		113.14		102.5		73.28		103.98		172.48		80.99		150.32
	171.43		124.38		154.13		83.55		149.4		172.61		133.28		86.37		131.19
	100.65		150.85		134.69		80.99		89.26		115.86		111.52		124.79		132.08
	152.38		102.36		121.07		63.4		68.68		109.09		109.15		75.14		136.56
	132.24		172.74		126.12		126.81		161.85		159.55		130.03		49.52		146.01
	119.01		163.59		151.71		105.85		123.62		135.28		131.36		47.12		159.5
	147.94		174.49		184.12		61.43		129.41		76.67		124.38		115.67		86.87
	142.64		184.79		124.03		95.24		93		133.33		124.03		129.52		165.4
	62.01		169.08		158.95		47.73		126.12		143.4		97.12		86.87		116.61
	79.27		168.4		121.49		240.03		95.54		135.12		121.49		94.24		95.31
	115.17		155.49		163.59		35.94		118.65		121.49		104.81		135.01		170.24
	141.41		155.49		100.57		164.52		97.57		141.77		139.5		141		151.71
	161.98		177.87		171.22		43.44		124.38		155.07		182.58		80.36		127.32
	110.48		175.61		128.06		62.48		111.07		91.59		131.36		161.62		154.27
	209.8		198.1		169.9		70.24		82.06		176.11		127.72		121.07		121.55
	114.35		158.95		132.08		51.11		134.2		133.28		123.62		118.28		183.25
	115.3		172.4		183.49		94.24		36.14		115.86		175.61		51.25		137.41
	80.81		128.91		115.86		76.19		63.86		73.97		88.85		73.18		137.35
	138.67		121.55		165.05		98.83		63.4		77.14		52.92		83.55		134.2
	184.44		139.76		173.91		68.68		100.57		163.85		125.77		80.36		136.13
	103.98				56.63		80.99		108.96		192.79		116.3		122.85		166.97
	103.98		129.41		121.01		121.25		83.64		206.49		149.4		124.55		126.18
	155.07		151.23		180.7		170.24		43.44		121.25		95.47		136.4		102.5
	124.38		170.58		97.12		60.23		121.96		54.54		136.56		86.37		127.32
	103.63		161.62		126.63		65.54		80.81		101.44		136.56		126.86		105.64
	134.69		128.06		196.66		107.88		70.04		126.63		152.43		53.33		145.06
	154.13		137.62		99.7		86.2		112.04		113.07		105.85		60.23		162.07
	62.83		184.44		78.54		75.42		102.57		105.09		142.23		144.81		137.41
	105.37		191.31		75.62		131.58		61.43		146.01		100.57		121.96		141.41
	138.46		158.95		105.92		165.4		116.3		110.48		80.99		49.67		142.64
	174.07		162.43		140.07		176.48		75.42		111.07		150.85		152.09		162.07
	156.61		164.83		179.09		110.74		147.05		140.07		164.34		132.68		158.59
	133.77		184.44		64.76		32.32		61.54		136.56		106.73		102.57		151.23
	211.59		188.87		97.57		166.97		157.72		109.88		107.34		100.57		148.18
	187.6		128		119.62		147.05		103.98		78.44		122.68		126.12		154.7
	115.67		199.63		112.04		59.63		132.08		66.53		83.64		84.16		168.7
	147.94		132.24		117.36		43.44		144.01		120.29		76.19		96.15		162.74
	63.06		174.49		134.63		55.47		176.76		107.55		172.78		50.83		167.1
	128		165.4		112.04		67.83		70.04		152.57		98.31		94.32		99.34
	140.07		105.92		170.75		186.71		126.86		58.27		53.87		119.26		168.7
	121.07		124.96		143.4		52.92		138.67		113.65		54.14		113.65		121.01
	118.34		113.07		143		194.29		70.24		172.15		126.63		111.07		124.96
	128.06		127.32		141		96.97		89.91		132.68		157.07		91.59		129.41
	116.05		147.05		177.87		58.27		137.62		132.02		94.32		127.72		143.76
	91.75		135.97		168.7		53.06		191.43		145.86		126.81		72.48		142.64
	151.66		143		70.04		95.24		136.29		148.38		98.83		177.79		121.55
	130.03		152.24		128.06		86.37		54.14		177.71		120.47		61.43		166.97
	89.26		115.17		160.77		75.42		87.7		78.54		145.81		97.57		176.11
	139.87		134.69		145.06		85.61		117.36		146.36		148.38		92.06		145.46
	172.15		107.88		196.66		58.15		51.82		173.74		132.24		153.57		132.08
	127.78		99.34		194.62		70.24		107.82		126.63		186.36		163.85		171.22
	125.31		144.81		167.36		43.44		68.15		155.49		163.99		161.71		160.77
	95.92		175.4		148.57		132.51		178.89		95.24		112.49		116.3		152.38
	73.18		161.13		93		170.58		131.08		89.26		94.32		112.56		136.4
	147.15		148.38		154.13		66.53		128.91		134.63		145.86		69.93		140.07
	145.56		143.76		75.14		161.71		171.43		119.01		138.67		64.76		159.14
	150.95		100.57		169.21		128		132.02		85.61		158.45		141		163.63
	191.73		168.7		140.18		162.07		133.06		158.54		99.34		136.4		137.62
	148.77		149.01		134.63		64.76		114.35		105.37		102.57		59.63		145.81
	70.04		129.52		147.94		58.15		73.97		137.67		146.56		141		112.56
	139.71		139.5		175.4		56.25		104.61		167.79		128.91		78.54		145.06
	133.28		136.29		148.38		114.6		124.03		132.9		158.59		75.62		156.75
	124.96		141.77		150.85		176.48		148.18		137.41		139.71		132.08		165.4
	122.14		163.59		134.2		77.14		105.37		96.15		144.81		109.69		145.56
	124.79		99.34		163.63		69.93		63.06		137.35		138.04		112.11		126.86
	137.67		132.08		180.66		122.68		85.18		148.38		172.48		88.93		121.01
	140.07		160.77		135.28		46.03		59.63		193.95		114.29		159.14		138.67
	87.04		115.86		109.95		193.95		132.51		96.97		61.54		124.79		148.23
	92.69		151.09		154.27		71.57		92.14		119.26		119.01		53.47		136.29
	164.52		158.77		163.99		114.35		100.21		103.98		132.08		80.36		167.27
	112.04		148.23		139.5		65.1		109.15		88.93		134.69		102.93		143.2
	154.37		141.57		169.9		180.66		94.32		131.36		132.08		72.28		160.72
	161.67		156.89		196.81		147.94		149.01		131.36		70.86		134.2		141
	179.82		149.35		89.26		63.86		114.16		124.38		154.13		73.18		155.45
	156.24		161.62		167.36		110.48		75.62		132.68		63.06		43.44		109.88
	162.07		170.58		105.92		32.32		90.87		118.52		148.77		127.78		124.55
	197.55		81.79		151.71		44.43		121.25		129.3		115.86		106.26		147.94
	158.59		134.79		95.92		50.83		134.69		105.09		131.08		102.22		140.49
	163.81		181.74		155.45		118.34		136.4		126.86		107.75		116.55		185.77
	182.3		122.68		153.57		172.15		150.95		124.03		126.12		45.71		143.76
	177.87		106.73		141.77		143.76		51.82		173.74		103.63		99.34		157.85
	194.25		146.56		130.03		78.16		122.85		142.64		102.36		81.53		116.3
	145.06		180.98		158.95		157.07		104.05		207.16		137.62		83.9		126.86
	140.54		168.65		203.94		126.86		109.15		87.95		158.45		90.55		145.86
	114.35		109.15		63.86		88.93		84.59		129.41		145.56		107.28		98.31
	176.15		138.09		144.81		102.5		114.35		113.27		128.91		144.81		117.6
	56.25		134.63		164.83		134.2		67.83		139.71		70.04		107.28		142.64
	143.15		176.15		210.35		51.25		88.85		191.31		60.23		110.54		134.69
	164.21		178.36		163.05		39.22		127.15		134.69		45.87		107.82		132.02
	164.91		156.38		122.68		81.53		106.67		162.43		135.28		115.67		138.04
	170.24		176.11		145.46		41.03		157.72		194.29		134.69		116.61		119.62
	110.74		164.87		118.34		86.87		66.64		116.61		149.35		48.49		134.2
	153.33		142.64		137.62		53.87		86.87		121.01		139.5		99.7		117.36
	128.06		142.34		143.45		50.11		58.15		141.72		117.6		129.41		126.86
	121.25		167.79		150.08		41.21		188.64		117.36		154.7		93		76.19
	164.52		174.07		152.38		78.16		133.33		169.17		137.41		67.4		147
	152.43		202.44		133.28		161.85		122.85		107.88		160.72		144.56		157.49
	159.55		148.38		119.01		70.86		116.61		132.08		82.41		72.28
	184.95		120.47		156.89		76.67		94.32		142.64		73.18		109.15		60.23
	169.17		133.28		136.56		85.18		86.2		175.11		124.96		83.55		164.52
	141.41		141		155.45		196.66		128.06		150.85		167.36		77.14		161.67
	112.49		86.2		134.69		121.07		167.36		151.23		126.81		34.07		166.32
	92.22		153.76		149.01		94.09		116.11		169.9		196.66		96.15		43.44
	86.87		168.4		100		229.36		109.69		153.57		128		126.63		165.26
	155.49		151.71		172.27		80.99		128.06		141.77		80.99		72.78		152.24
	142.34		131.08		136.4		62.01		145.86		146.36		148.18		111.52		38.1
	160.77		167.36		160.72		97.12		122.97		38.1		135.01		137.62		109.15
	172.48		122.68		135.12		98.83		115.67		142.64		134.79		44.59		100
	86.87		133.33		213.23		66.53		116.61		114.35		83.9		117.36		82.41
	149.35		94.09		172.48		103.98		124.79		132.24		121.07		82.41		152.38
	180.98		134.79		122.97		83.55		113.07		165.4		115.86		35.94		138.51
	135.65		172.27		155.07		161.71		85.61		112.49		118.34		135.12		127.32
	115.17		164.52		150.13		80.99		121.96		108.29		90.87		78.16		159.14
	122.68		186.36		166.1		113.27		83.9		139.5		182.9		86.37		107.55
	169.17		176.11		129.3		124.03		114.86				183.25		101.44		209.52
	131.36		179.82		165.4		167.27		99.7		112.82		149.01		89.26		154.7
			147.05		144.01		32.77		95.54		138.04		55.47		71.88		176.11
	175.28		132.24		78.16		134.63		145.46		124.38		184.28		86.37		103.63
	133.39		56.25		113.65		68.15		80.81		106.26		128		58.15		118.65
	114.35		151.09		155.07		52.92		148.77		129.75		124.03		88.93		179.09
	130.42		169.17		163.05		112.04		96.15		103.63		108.96		105.92		194.14
	144.81		167.1		92.14		96.97		105.92		104.61		137.41		89.91		121.55
	154.13		150.27		153.57		150.13		58.27		151.66		147.94		102.57		134.79
	149.69		116.61		186.04		70.86		87.7		182.94		156.38		134.69		45.87
	124.55		134.79		147		89.26		144.01		150.08		169.9		132.08		49.67
	142.79		153.57		136.56		57.14		128.91		88.93		166.4		83.55		89.91
	180.7		97.57		169.73		105.37		121.96		192.64		160.05		116.3		146.36
	122.44		121.25		122.85		105.92		95.47		188.22		145.06		71.88		140.07
	70.86		105.09		116.11		179.09		123.38		144.81		154.27		80.99		161.71
	147.05		89.91		160.05		213.64		91.75		131.19		56.63		81.79		121.07
	156.75		159.55		81.53		73.97		116.05		129.36		60.95		101.44		128.51
	135.12		75.04		168.74		48.49		140.07		124.79				102.86		167.1
	133.28		150.08		180.98		143.76		125.77		148.23		62.01		102.57		115.86
	140.49		146.6		142.23		147		90.55		94.32		101.44		96.45		145.56
	124.03		156.24		129.75		70.86		115.86		172.1		105.64		75.62		173.16
	163.59		156.61		143.76		52.92		91.51		126.18		178.11		121.49		143.2
	88.61		159.09		129.58		138.04		80.81		66.53		109.09		54.94		149.01
	164.34		162.74		162.43		62.48		147		159.55		86.2		103.63		121.55
	113.07		147.94		205.04		49.67		83.9		61.54		111.07		139.76		153.24
	143.6		173.16				85.95		151.09		157.72		92.14		80.36		149.35
	150.13		140.95		117.36				121.25		140.54		86.95		160.77		151.71
	121.25		170.37		151.09				114.29		109.15		116.11		128.06		146.36
	109.09		148.77		126.63				157.49		89.26		62.48		100.57		174.49
	175.61		153.24		107.82				124.09		111.26		163.85		116.61		129.3
	113.27		90.31		118.52				152.24		130.92		114.6		75.62		166.1
	115.86		196.81		141.72				114.6		126.86		113.07		125.31		146.01
	125.77		148.57		87.7				83.55		147		115.86		87.04		139.87
	140.49		143.4		67.83				75.42		39.22		95.47		111.07		177.71
	157.49		183.17		141.72				87.7		192.18		102.5		92.77		118.52
	75.62		195.48		165.4				141		152.48		103.98		95.92		135.65
	86.37		179.09		48.49				109.69		155.49		112.49		110.74		140.18
	167.01		130.31		148.38				66.53		149.35		110.74		80.72		157.07
	102.93		141.77		172.48				102.57		150.95		81.53		127.72		129.3
	144.81		175.61		137.35				83.81		144.01		139.5		98.9		147
	172.27		174.12		161.67				141.57		144.01		156.33		116.05		118.34
	159.14		169.9		70.04				155.63		103.63		78.16		78.44		199.34
	120.47		148.38		156.89				73.18		165.97		143.2		129.52		142.79
	109.09		180.5		144.81				73.28		153.57		113.65		97.12		138.04
	100		137.35		117.66				67.5		135.65		65.1		153.38		162.21
	118.65		165.4		153.33				83.9		82.41		61.43		76.19		121.01
	125.77		148.77		130.31				88.93		211.83		118.52		84.59		122.85
	158.45		135.97		26.94				69.93		135.12		137.41		57.14		169.73
	117.6		126.86		73.18				58.27		162.07		126.81		123.62		191.08
	171.43		107.28		112.56				135.12		34.07		116.11		124.03		149.01
	113.07		165.4		160.18				133.33		112.56		144.81		70.24		179.82
	130.03		109.09		126.81				91.75		102.5		142.64		99.7		122.14
	139.87		147.94		145.46				80.36		137.2		145.56		156.61		96.15
	110.74		126.63		134.69				114.29		164.87		138.67		76.67		66.53
	152.57		108.29		200.5				173.74		154.13		165.97		104.61		86.95
	137.35		179.69		107.88				46.03		153.76		59.14		77.14		209.84
	119.62		148.38		150.08				56.25		114.6		106.73		153.76		106.12
	139.5		145.81		120.47				105.09		154.27		100		102.93		129.75
	152.38		154.27		144.01				159.5		117.36		87.95		133.55		138.67
	149.35		135.28		167.01				101.22		123.62		138.04		126.81		108.29
	189.79		98.9		85.61				67.5		45.87		119.62		126.63		121.01
	81.79		151.23		175.78				78.54		76.19		120.29		110.48		169.73
	182.9		83.55		101.44				81.79		129.52		84.59		32.55		148.38
	150.95		157.07		86.87				102.22		162.43		108.96		85.61		138.67
	159.09		126.63		126.18				114.29		110.74		121.25		72.78		194.25
	100.57		179.69		134.69				86.37		161.67		100		70.24		106.73
	113.14		102.5		185.89				57.14		78.54		135.12		105.37		110.48
	150.08		103.14		150.27				143.6		136.29		138.51		87.7		117.66
	160.72		150.27		83.55				29.75		173.28		120.47		157.35		127.32
	95.24		165.4		78.16				122.85		129.41		113.65		116.3		94.63
	147.05		109.15		176.76				92.06		159.5		133.82		105.64		118.65
	119.26		148.18		129.58				66.64		156.33		151.71		124.03		175.28
	124.38		59.63		132.24				59.14		153.24		134.69		65.54		140.18
	135.28		154.13		184.79				88.85		149.01		125.77		70.86		159.14
	123.91		159.5		87.04				127.78		151.81		92.14		150.95		110.48
	172.95		78.54		141.72				86.37		136.56		80.09		85.61		172.48
	140.54		154.27		142.23				140.18		116.11		140.07		146.36		58.15
	156.33		119.62		96.15				59.26		158.77		167.79		76.57		179.53
	167.66		121.01		141				107.75		97.57		68.68		138.04		82.41
	132.02		127.32		126.81				136.4		126.86		108.96		157.85		161.67
	170.58		117.36		91.59				122.68		138.04		102.5		99.7		179.69
	175.61		126.12		71.17				88.85		168.4		104.05		100		153.57
	133.33		173.28		140.49				105.92		167.1		128.91		107.88		121.49
	137.67		67.4		92.69				95.54		179.69		130.42		172.27		187.44
	75.42		115.86		87.04				99.05		162.07		102.93		111.07		172.27
	160.18		121.96		108.29				147		172.15		119.01		84.59		148.23
	141.41		142.23		166.1				145.56		107.75		72.78		120.29		119.01
	114.35		102.22		100.57				126.12		135.12		131.36		135.65		156.38
	128.91		50.83		160.05				133.28		129.52		101.44		139.71		195.92
	117.6		80.09		146.56				160.59		161.85		170.75		84.59		183.85
	136.29		110.74		130.03				122.85		177.26		146.56		74.85		121.73
	164.87		105.92		109.95				146.01		131.58		139.87		69.52		152.38
	140.18		93.7		109.95				151.71		121.49		54.54		85.18		145.06
	140.54		138.67		170.75				162.07		150.85		124.03		108.96		121.96
	112.49		162.07		94.09				115.86		167.66		71.57		79.27		119.62
	161.67		156.33		123.91				112.56		163.85		133.33		119.32		156.33
	177.26		87.95		119.62				147.15		109.15		145.86		109.95		128.91
	148.38		57.14		107.88				104.61		151.09		90.31		107.28		142.23
	167.49		94.32		148.77				121.55		116.11		144.56		83.2		166.1
	145.56		152.38		113.27				127.78		83.55		147.94		106.12		150.08
	199.92		151.09		124.79				88.36		162.07		154.7		161.67		116.3
	161.62		95.47		167.01				75.42		81.53		132.24		83.64		115.86
	164.34		145.06		138.67				155.45		105.64		121.96		78.54		152.38
	98.83		97.12		83.55				84.59		148.18		132.02		124.03		111.07
	190.93		115.17		121.55				149.69		112.49		102.57		92.77		98.31
	165.4		83.9		170.75				58.15		150.95		125.31		121.07		182.42
	140.18		106.73		212.96				83.9		188.87		122.85		63.06		155.45
	116.11		148.23		164.87				155.45		138.67		92.77		160.77		98.9
	145.81		80.99		118.65				122.68		170.07		138.09		119.56		185.14
	182.42		115.86		99.34				167.1		156.19		150.27		132.68		141.57
	143.4		145.56		167.36				157.07		138.67		114.86		127.32		136.13
	134.69		122.68		122.85				83.55		151.66		91.59		67.4		88.85
	116.05		177.87		146.36				85.61		90.55		91.43		102.5		77.14
	140.07		158.54		102.57				132.24		121.25		90.55		110.74		150.85
	172.48		101.44		163.63				162.43		145.86		176.15		129.75		171.43
	148.23		131.36		177.79				160.23		167.79		126.63		124.96		165.57
	160.05		130.03		122.97				116.61		164.34		128		147.94		164.52
	153.24		166.1		191.58				124.79		153.76		126.23		80.99		121.73
	199.74		119.01		145.81				118.34		126.63		141.41		88.93		116.61
	156.33		183.25		162.74				145.06		88.93		137.35		108.42		146.36
	144.81		111.07		145.21				121.73		133.28		145.81		45.87		193.42
	121.96		134.2		126.63				125.31		89.26		115.86		114.35		122.68
	160.59		161.44		137.62				116.11		53.06		114.29		65.76		132.24
	177.58		131.19		121.96				124.96		126.63		151.09		130.19		104.81
	173.91		139.76		126.86				132.02		145.46		63.06		66.53		160.72
	150.95		65.54		121.25				161.71		161.71		161.85		94.32		160.77
	147		122.85		99.34				92.14		122.85		154.37		126.86		148.18
	160.18		162.07		64.87				142.79		105.37		97.12		138.51		129.3
	174.49		109.09		170.11				130.31		129.75		131.19		152.09		164.52
	183.25		106.73		92.22				129.3		153.57		142.79		159.55		154.13
	132.08		147		153.57				142.64		38.1		92.22		164.87		107.75
	47.12		175.61		153.57				117.36		68.15		118.28		157.72		124.03
	62.83		135.28		159.5				110.74		122.85		170.37		141.57		120.47
	158.95		153		83.9				106.73		184.95		170.11		89.18		100.65
	141.41		135.12		121.55				131.19		76.19		175.9		55.47		107.34
	80.81		151.71		139.71				89.91		118.28		69.93		75.04		108.96
	139.87		124.03		150.13				121.25		170.11		164.52		167.27		161.71
	144.01		198.1		135.12				116.61		145.06		129.41		75.04		134.79
	174.49		139.03		137.62				111.26		165.26		105.09		88.93		109.15
	134.69		159.5		124.96				91.59		153.57		156.38		63.06		175.11
	113.27		166.32		105.37				76.19		126.81		115.17		125.77		129.58
	146.01		165.4		131.08				39.22		159.5		181.46		140.18		100.57
	179.09		145.81		130.03				90.55		159.5		124.03		102.22		155.49
	154.27		141.77		112.56				70.86		86.37		138.09		121.07		189.44
	178.11		151.71		114.29				127.32		170.75		116.61		152.38		187.02
	170.75		140.07		159.5				138.04		130.03		180.62		106.12		106.73
	109.88		114.86		137.35				102.5		140.49		91.75		80.99		182.58
	138.46		196.66		140.49				119.56		189.48		124.38		115.86		141.41
	160.23		129.75		149.35				121.25		126.63		167.01		97.94		151.81
	108.29		172.61		150.27				167.79		159.55		119.01		144.01		130.31
	82.06		172.4		135.28				76.67		134.79		167.1		99.34		116.05
	140.54		80.36		134.63				145.21		159.5		170.75		67.5		163.63
	143.4		130.31		138.04				166.97		104.61		169.73		145.81		173.74
	133.28		159.14		156.33				81.53		77.04		165.97		146.36		126.18
	151.23		64.65		121.49				127.32		156.75		148.18		126.18		160.59
	135.12		173.91		134.2				108.29		176.48		184.44		155.63		187.6
	138.67		88.93		153.24				115.86		94.09		148.18		110.54		190.21
	124.38		154.7		160.05				109.69		136.56		133.33		135.12		160.77
	101.65		123.09		119.01				124.38		166.97		51.11		87.04		178.52
	120.47		146.56		137.41				80.81		135.28		118.16		110.74		147
	135.65		119.56		117.66				103.98		183.25		138.04		102.5		114.35
	143		142.79		185.89				134.2		155.07		132.08		105.09		149.01
	161.98		167.1		210.35				35.94		163.63		179.09		81.44		121.25
	148.18		128.91		155.45				162.74		133.28		85.18		73.18		192.3
	197.99		51.25		30.71				145.56		154.13		141.57		138.04		128.91
	115.86		150.85		92.22				144.01		124.96		111.07		131.58		212.96
	148.18		124.96		172.48				118.52		133.28		100.86		98.9		146.01
	88.61		171.13		48.49				137.41		121.96		126.81		101.22		174.12
	147.94		87.95		152.24				127.32		115.86		132.08		102.5		169.08
	172.1		179.09		164.47				83.9		103.63		171.22		115.3		150.13
	134.2		102.36		167.1				102.93		91.51		137.35		49.52		142.64
	145.06		126.86		158.95				70.24		156.24		155.12		61.43		120.47
	100.57		128		124.79				80.99		179.69		164.21		53.87		128.06
	158.04		67.4		172.1				126.18		163.85		124.79		47.73		144.01
	138.04		170.75		146.36				81.79		124.96		108.42		148.77		116.11
	182.9		171.89		177.58				159.18		164.52		182.94		49.67		124.03
	172.27		119.01		153.76				132.68		121.01		121.07		122.14		154.13
	59.51		112.04		152.48				78.54		174.45		124.09		73.18		191.73
	151.09		128.06		151.23				50.11		89.26		157.85		80.36		161.98
	137.62		138.04		118.34				113.65		59.63		165.4		81.44		160.77
	121.73		177.58		160.77				171.22		102.36		166.62		167.1		142.64
	124.38		154.7		160.72				111.26		120.47		112.49		153.76		152.48
	140.49		113.65		172.48				79.27		156.89		77.14		138.67		78.54
	152.48		167.79		164.83				145.81		121.25		83.9		162.43		130.42
	140.49		179.09		151.71				113.14		143.2		166.62		131.08		165.97
	164.52		154.13		132.68				116.05		113.27		113.07		115.86		112.82
	112.49		122.85		61.07				71.57		111.52		94.32		71.57		157.07
	151.23		145.86		142.79				145.21		146.56		115.67		135.12		177.21
	174.49		158.95		143.2				158.95		78.54		129.75		78.44		95.24
	143.15		173.74		132.08				129.75		145.56		84.59		141.36		150.85
	152.38		92.06		113.65				129.75		152.24		157.07		151.23		134.79
	152.38		139.5		62.01				150.95		126.12		131.36		97.12		136.29
	151.09		156.75		89.91				147.05		103.63		141.72		117.66		108.29
	175.11		67.83		89.91				73.18		95.47		165.57		72.78		187.44
	157.07		182.9		100				131.36		92.22		62.48		65.54		142.79
	182.1		171.43		182.1				115.86		133.28		109.88		112.04		137.35
	107.88		173.28		89.26				114.29		167.36		202.8		121.49		174.49
	185.54		148.38		176.11				83.55		154.7		168.01		154.13		118.65
	112.04		136.77		113.65				142.64		110.74		144.81		151.23		167.66
	158.95		134.2		143				115.17		154.27		164.12		103.98		142.64
	136.29		141.57		164.52				138.09		128.91		110.74		93.39		196.11
	128.06		139.87		151.71				88.93		101.44		83.9		119.01		107.75
	99.34		171.22		96.37				146.36		117.36		151.66		136.56		150.27
	133.33		194.25		158.45				126.86		127.32		154.13		145.86		147
	173.91		138.04		128.91				128.91		156.93		143.4		66.64		153.24
	123.62		116.11		107.34				140.18		137.62		137.35		102.5		156.24
	102.22		128		128				97.57		117.66		172.27		78.54		172.95
	124.03		169.9		130.31				75.42		189.79		156.75		129.41		110.74
	92.14		159.14		166.1				86.2		158.59		97.12		143.2		85.18
	131.58		161.62		159.14				100		82.41		119.62		134.69		165.4
	192.9		140.07		82.41				137.62		148.77		124.38		76.67		51.25
	124.38		154.13		145.06				78.44		148.18		98.83		102.57		188.18
	183.49		191.31		183.17				116.11		128		148.57		119.32		138.09
	141.77		118.65		142.79				123.91		132.08		154.13		140.18		87.7
	159.14		171.43		121.01				84.33		156.38		142.79		151.66		128.06
	126.63		126.18		132.02				149.01		159.5		140.18		149.69		116.05
	116.86		115.86		76.29				104.81		173.28		143.2		141.72		98.83
	182.1		154.37		140.49				115.17		155.07		117.36		155.63		135.12
	104.81		136.4		86.95				75.62		103.14		103.98		60.23		89.67
	141		159.91		142.64				80.36		190.82		144.01		148.77		118.28
	172.27		124.96		118.16				137.35		145.86		164.52		124.55		153.57
	127.78		178.89		155.12				131.08		150.71		154.13		134.69		88.93
	121.07		168.01		121.25				141.16		156.93		39.22		82.41		189.14
	93		146.56		115.17				58.02		124.03		144.01		101.44		64.76
	83.81		150.13		169.17				85.18		145.06		154.27		92.06		97.12
	135.12		179.82		135.65				105.92		107.34		132.02		106.12		73.97
	170.37		156.33		143				86.87		114.16		128.91		70.04		105.37
	77.14		177.87		188.87				97.12		161.85		114.35		109.15		151.71
	159.55		160.18		158.59				97.57		100		106.73		120.47		83.64
	128		170.11		167.1				134.2		106.94		157.49		140.07		162.21
	94.24		108.29		124.38				51.82		100.21		126.81		176.48		67.4
	105.37		169.73		62.48				103.49		149.01		107.28		124.03		151.66
	67.5		205.01		113.65				165.26		113.27		124.79		97.65		158.95
	139.5		163.85		162.07				108.29		122.85		142.79		111.07		158.54
	152.38		162.43		116.86				35.94		103.63		112.11		143.76		134.69
	133.28		177.26		49.67				130.03		116.3		92.77		95.24		176.48
	145.06		194.25		197.1				119.26		157.07		142.64		166.97		154.13
	189.79		182.94		143.4				46.5		147		153.24		126.18		175.4
	132.08		144.81		158.54				143.15		171.22		150.85		148.38		125.77
	169.17		140.18		191.31				100.65		111.07		37.52		151.66		117.66
	169.9		138.04		135.28				27.47		132.24		153.57		145.81		153.57
	132.68		185.14		149.01				133.28		117.6		153.38		135.12		68.68
	135.12		183.49		134.69				62.01		140.07		100.57		65.21		203.94
	175.28		136.29		125.66				135.65		156.24		131.36		64.65		113.65
	130.03		208.27		144.56				87.7		108.42		111.07		63.86		140.54
	124.38		183.85		113.07				142.23		119.32		135.28		132.24		107.88
	171.13		161.98		136.77				53.87		84.59		121.01		100		70.04
	71.57		152.38		131.19				100		116.61		92.69		83.9		96.15
	185.77		161.85		53.87				109.88		156.24		133.28		40.5		78.16
	136.56		193.99		172.15				127.78		101.65		114.16		55.47		121.07
	116.55		153.57		133.33				113.07		112.49		106.26				100.65
	126.63		191.08		134.79				142.23		54.54		132.02		73.28		105.37
	183.25		157.49		129.75				56.25		151.71		91.59		82.06		110.48
	155.45		161.71		156.33				123.91		102.93		93		107.82		196.66
	131.36		158.54		140.54				94.32		176.11		117.66		65.54		182.42
	105.37		208.69		122.68				147.05		173.28		100.65		104.61		157.07
	134.63		140.07		167.79				93		105.09		119.26		73.18		135.01
	134.63		170.11		161.85				119.01		155.12		128		107.88		145.56
	130.31		154.7		94.09				139.5		146.56		105.09		108.29		140.54
	177.87				164.34				86.2		144.56		138.51		78.54		102.5
	162.74				145.81				142.23		35.12		117.36		99.7		89.18
	194.14				90.55				124.79		79.55		154.13		119.26		178.56
	146.36				92.22				163.63		95.47		161.62		127.78		75.14
	107.28				122.44				132.02		83.64		164.87		85.18		158.45
	136.56				157.72				53.06		151.23		89.91		130.19		132.02
	153.57				100.57				118.16		102.57		154.13		84.59		169.17
	145.56				111.07				113.07		141.41		140.54		64.87		153.57
	166.1				158.95				103.49		105.09		165.97		92.22		141.72
	146.36				145.56				148.77		124.03		151.09		62.01		83.64
	150.71				155.4				62.01		117.36		153.57		80.99		145.81
	148.38				145.86				108.29		129.41		119.62		63.06		126.81
	147.05				118.34				89.26		152.09		139.87		73.18		132.51
	86.95				183.85				65.76		148.57		95.47		95.24		164.34
	173.49				145.06				132.51		112.04		133.82		116.86		146.36
	170.58				160.05				64.76		124.09		162.43		126.86		172.48
	166.97				164.87				144.01		109.88		163.85		110.94		132.24
	167.1				159.5				145.86		95.24		124.38		105.37		106.73
	145.06				150.85				177.26		126.86		139.5		108.29		135.28
	157.85				144.56				79.27		123.91		122.14		130.31		169.17
	139.71				180.98				128		135.65		116.3		105.92		165.97
	98.31				134.69				137.2		119.62		86.87		85.61		131.36
	147.15				126.63				82.41		112.04		107.28		77.7		145.86
	136.4				159.14				106.12		112.49		138.67		73.18		151.66
	136.13				124.03				107.34		151.09		172.61		88.36		191.43
	124.79				182.9				136.4		83.55		121.55		72.78		135.12
	123.09				135.12				119.26		145.81		153.57		117.36		157.72
	207.96				84.33				120.29		83.64		160.72		113.65		153.33
	212.24				196.62				68.15		141.57		162.74		99.34		149.93
	76.19				138.67				43.44		144.81		151.71		79.27		121.55
	151.09				133.28				89.91		141.72		139.03		65.76		177.42
	140.07				182.3				78.44		141.41		147.15		97.35		63.86
	143.4				128.91				70.86		164.34		128.91		102.22		164.83
	179.21				153.57				54.14		116.11		159.14		111.26		148.77
	153.76				181.74				124.55		121.96		167.49		115.17		111.07
	160.72				181.1				110.48		143.4		109.88		57.14		127.78
	148.38				155.07				138.04		142.23		93.7		81.79		162.07
	149.35				165.97				153.57		149.69		139.5		102.57		125.77
	131.08				171.43				73.28		155.12		138.04		107.28		113.65
	148.38				174.49				45.87		144.81		170.24		38.85		155.45
	147.05				133.28				72.78		121.49		110.94		131.08		134.63
	167.79				136.56				88.85		155.12		97.57		119.26		110.48
	169.17				133.33				70.04		138.67		160.72		106.12		151.09
	167.1				121.25				102.22		102.57		105.09		111.07		177.58
	150.32				152.38				76.19		151.71		145.86		129.3		95.47
	160.18				115.86				70.04		151.66		157.72		89.26		162.43
	128.91				170.11				143.2		62.01		147		147.05		138.51
					95.47				124.03		91.75		157.07		113.27		209.56
					151.71				146.36		157.07		103.63		61.54		121.49
					157.85				114.86		148.38		118.16		114.35		87.7
					121.25				126.81		43.44		137.62		118.34		146.36
					137.35				98.31		183.25		121.49		117.6		155.07
					116.3				116.3		154.13		155.4		65.54		171.43
					115.86				66.64		124.03		120.47		109.88		158.54
					113.65				160.23		143.15		135.12		130.19		78.54
					169.17				116.55		116.3		166.97		115.67		144.01
					195.48				62.48		102.57		125.77		99.7		114.35
					107.82				113.07		122.68		59.26		89.91		171.22
					105.85				64.87		138.67		72.78		82.24		163.85
					129.41				73.18		168.4		204.44		169.9		44.43
					132.02				89.91		160.23		132.02		83.9		135.65
					126.81				144.01		141		141.77		126.63		174.45
					184.95				140.54		107.55		130.03		105.37		54.94
					137.62				100		117.36		183.17		118.52		70.24
					172.15				124.38		138.67		122.97		170.58		185.77
					145.06				96.37		169.73		101.65		155.45		151.23
					71.57				106.12		115.86		124.79		150.08		150.71
					149.35				103.98		116.11		127.78		135.12		127.78
					114.16				150.08		48.49		150.32		110.74		137.41
					139.76				115.86		160.77		131.53		72.78		102.36
					140.07				126.86		139.76		173.49		84.16		99.7
					84.59				80		95.24		93.39		121.55		191.73
					154.27				48.79		61.43		121.01		124.38		56.63
					91.75				83.9		141.77		160.18		143.4		72.78
					143.76				92.22		62.01		155.07		138.67		183.06
					119.26				102.22		145.56		146.6		137.62		113.14
					100.57				95.47		160.77		141		97.57		109.15
					109.15				158.45		157.72		133.06		95.47		86.87
					175.28				109.15		151.71		110.48		121.07		80.72
					118.65				126.86		112.04		156.61		110.74		147
					145.86				110.48		134.79		172.27		89.26		171.43
					156.38				73.97		106.26		125.77		97.12		134.79
					118.52				113.27		145.56		146.6		141.72		188.64
					161.62				161.71		139.87		120.47		73.57		108.29
					140.07				62.48		124.38		107.82		100.65		199.45
					160.77				127.78		113.27		140.07		75.14		61.43
					187.02				83.9		67.83		155.07		78.44		110.48
					133.39				136.4		59.14		153.38		92.77		153.76
					148.38				132.9		158.59		143.6		138.67		196.66
					86.87				132.68		120.47		101.65		102.22		116.3
					183.49				144.81		101.44		132.9		106.26		149.35
					131.36				103.63		123.62		123.09		126.18		163.99
					137.99				140.95		186.04		77.14		46.5		67.83
					123.62				113.65		134.69		175.78		54.54		142.34
					156.89				119.01		117.36		145.86		61.07		138.04
					48.49				164.12		149.35		112.49		123.09		130.31
					120.47				175.11		171.43		130.03		140.07		144.21
					142.34				64.76				94.09		76.19		147.15
					162.43				163.99				134.63		80.81		127.72
					156.89				88.85				132.24		51.82		153
					179.82				95.47				84.59		99.7		190.93
					141.77				153.57				137.41		107.88
					150.13				78.54				162.74		82.06
					141				92.22				156.38		136.13
					163.05				152.38				156.93		132.02
					133.33				105.92				118.34		113.65
					150.08				116.61				119.26		110.48
					163.99				73.57				151.23		99.34
					162.21				122.68				143.15		59.51
					166.97				78.54				153.57		132.9
					128.91				92.06				142.79		83.64
					145.81				167.1				100		139.5
					118.65				159.18				132.24		156.89
					178.11				51.11				155.45		119.62
					129.52				98.31				117.36		148.18
					133.28				138.04				132.08		122.68
					151.71				147.94				145.06		110.74
					154.7				153.57				134.79		95.24
					169.9				132.51				180.98		121.25
					156.33				107.82				144.56		62.01
					119.01				151.23				130.31		129.3
					157.07				145.86				89.91		88.85
					186				153.76				138.67		85.18
					97.35				105.92				116.3		70.24
					147.05				103.98				126.12		93.7
					156.24				102.22						85.18
					179.69				75.62						89.26
					146.56				167.1						86.95
					121.96				136.4						86.95
					105.64				141.72						88.93
					110.94				136.4						107.55
					164.87				61.43						86.2
					190.48				97.35						89.67
					165.05				123.91						127.78
					141				83.55						67.4
					154.13				158.77						85.18
					159.14				136.56						111.26
					173.91				71.57						68.15
					164.83				135.65						77.14
					133.77				131.08						145.81
					129.41				136.29						86.87
					135.28				143.76						94.32
					125.77				96.15						42.59
					170.11				78.54						123.62
					149.01				143						97.12
					108.29				151.09						123.62
					153.33				102.57						105.37
					132.02				100.65						100.57
					167.01				151.71						99.34
					117.36				99.7						110.74
					172.4				84.33						88.85
					168.4				109.95						113.27
					121.55				99.34						107.55
					145.06				92.14						106.73
					154.27				122.68						102.93
					132.68				91.75						113.65
					148.57				68.99						91.59
					128.91				127.32						116.86
					175.28				113.27						124.79
					166.1				73.18						78.54
					175.4				180.98						99.7
					152.38				60.23						97.57
					175.28				75.14						90.87
					157.72				158.54						87.04
					148.38				140.54						140.95
					166.1				78.54						78.54
					90.87				87.7						59.14
					115.86				72.28						64.65
					159.14				156.38						92.22
					95.24				126.63						130.31
					146.6				133.06						169.21
					153.76				45.87						134.79
					165.4				59.51						143.4
					145.81				85.61						98.31
					143.15				171.43						78.54
					153.57				122.68						108.29
					146.36				92.22						99.05
					165.4				123.62						84.59
					109.95				112.49						64.87
					48.19				152.24						98.31
					146.6				95.47						64.87
					85.61				119.01						81.79
									113.65						66.64
									122.68						95.54
									135.65						119.26
									113.14						148.57
									102.36						92.22
									90.31						156.38
									119.01						142.79
									73.97						73.97
									100.57						112.49
									178.11						129.75
									119.62						72.28
									128.91						135.28
									73.97						38.1
									143.4						105.92
									154.7						104.61
									143.6						89.91
									125.94						124.96
									67.5						116.3
									107.75						101.44
									102.93						75.04
									130.03						76.67
									91.75						116.11
									113.65						120.47
									142.79						81.44
									121.49						152.57
									87.7						99.7
									67.4						78.44
									151.23						67.4
									105.92						62.01
									156.24						121.55
									47.73						121.49
									125.66						159.14
									81.53						93
									110.74						99.7
									95.24						127.32
									97.65						114.35
									85.18						63.86
									68.57						65.21
									51.82						44.43
									93						72.48
									95.24						85.18
									102.22						105.92
									148.18						73.18
									73.18						78.44
									114.16						99.34
									119.62						169.21
									118.65						61.43
									117.36						133.55
									161.71						69.93
									108.96						131.08
									105.09						149.01
															104.81
									81.79						109.15
									165.4						121.73
									137.35						99.34
									102.5						89.67
									71.57						69.52
									80.09						73.97
									151.71						84.59
									157.07						113.65
									102.22						137.41
									90.31						108.29
									164.87						83.64
									135.65						139.5
									103.49						102.5
									134.69						102.57
									132.02						82.41
									105.37						80.36
									118.65						121.07
									119.62						91.75
									121.25						75.62
									81.79						111.52
									100.57						175.61
									127.32						84.16
									79.55						97.12
									72.78						116.61
									129.75						102.36
									89.26						93
									105.37						117.6
									105.09						99.34
									129.75						135.65
									84.16						156.89
									103.98						112.56
									124.55						137.62
									156.89						105.37
									87.7						102.36
									78.16						51.25
									97.57						56.63
									97.57						124.79
									167.79						119.01
									116.3						84.33
									108.29						93.7
									126.63						121.96
									93						80.99
									129.36						119.62
									108.96						123.09
									91.75						83.55
									104.05						77.14
									82.06						100.57
									44.59						93
									119.62						75.14
									167.36						63.4
									113.27						141
									140.54						152.81
									63.86						87.04
									114.6						90.87
									78.16						147.05
									121.07						135.12
									88.85						123.62
									90.55						84.59
									62.01						88.93
									134.63						126.81
									107.75						155.63
									106.12						124.38
									114.29						92.06
									119.56						141.57
									88.93						127.72
									80.81						103.63
									45.87						71.88
									78.16						92.06
									65.1						141
									64.87						119.01
									79.55						84.16
									106.73						103.98
									110.48						98.31
									128.06						124.79
									164.47						117.36
									105.85						102.93
									84.33						114.29
									126.63						140.07
									82.24						128.91
									121.01						120.29
									88.93						69.52
									117.36						162.07
									68.68						112.56
									145.46						72.28
									53.87						124.96
									178.52						129.75
									86.95						86.87
									131.08						77.14
									84.33						62.83
									111.26						83.55
									132.68						105.85
									90.87						93
									83.9						85.18
									121.96						129.41
									73.97						61.54
									103.63						110.74
									114.35						109.88
									132.24						58.02
									102.5						140.07
									29.75						151.23
									86.37						132.68
									59.51						94.09
									67.5						62.01
									124.79						87.7
									141						67.83
									70.24						172.1
									119.56						129.41
									167.79						102.93
									119.01						66.53
									100						91.59
									107.88						109.09
									102.22						113.07
									104.61						99.34
									97.12						89.26
									135.28						88.93
									130.31						134.79
									100.65						101.22
									116.3						94.24
									118.52						99.34
									69.93						73.57
									50.11						159.5
									162.74						91.51
									125.77						136.56
									76.67						94.63
									97.57						99.7
									152.57						144.01
									93						115.86
									117.66						99.05
									86.37						135.28
									78.16						86.37
									113.65						83.64
									109.15						86.2
									50.83						100.57
									151.71						83.9
									97.35						94.24
									35.94						49.67
									49.67						99.34
									80.81						105.37
									86.2						105.37
									129.3						102.57
									86.2						72.78
									54.14						91.75
									83.55						132.24
									159.14						131.19
									111.26						51.82
									121.07						107.34
									98.31						86.2
									119.01						112.49
									96.45						89.91
									124.96						100.57
									121.01						111.07
									83.9						99.34
									140.49						157.07
									98.31						89.26
									169.21						68.68
									131.08						156.33
									122.68						107.28
									147						140.07
									87.7						124.38
									70.86						88.93
									112.49						82.06
									119.56						127.78
									78.54						143.6
									78.16						135.01
									126.12						107.88
									105.85						87.7
									120.47						128
									75.04						89.91
									151.09						100.65
									83.64						127.32
									84.33						47.73
									110.74						121.55
									86.95						99.05
									145.86						107.28
									135.65						121.07
									118.34						119.26
									81.53						87.04
									71.88						141.41
									123.62						141.77
									80.81						88.93
									116.3						116.05
									105.92						73.28
									77.14						100
									128.06						155.07
									156.33						130.31
									120.47						85.61
									99.34						137.62
									147						111.26
									105.37						103.63
									81.79						72.78
									151.71						108.42
									145.86						78.54
									66.64						116.3
									117.36						159.09
									60.23						137.35
									92.14						107.28
									126.18						75.42
									144.01						45.71
									131.08						129.52
									95.47						89.26
									102.5
									129.58
									51.82
									111.07
									89.26
									86.2
									67.4
									87.7
									132.9
									78.54
									99.05
									73.28
									159.09
									120.47
									62.83
									78.16
									112.04
									99.7
									94.32
									84.59
									95.24
									90.87
									96.97
									124.55
									78.54
									132.02
									87.95
									119.26
									96.15
									108.35
									102.36
									97.57
									142.79
									78.54
									128.91
									105.09
									95.24
									112.04
									119.26
									73.18
									192.18
									61.43
									150.85
									169.9
									87.7
									157.07
									112.04
									186.82
									157.07
									120.47
									90.55
									140.49
									67.83
									97.94
									85.61
									159.55
									68.68
									171.22
									105.92
									107.55
									102.22
									107.28
									136.56
									104.61
									86.87
									66.64
									44.43
									122.68
									135.65
									92.22
									67.4
									113.27
									137.62
									95.54
									136.56
									129.41
									116.86
									169.9
									112.11
									134.69
									138.09
									63.4
									77.04
									30.71
									141.77
									153.57
									109.15
									117.36
									113.27
									120.47
									86.37
									134.69
									125.77
									140.18
									67.5
									80.81
									119.26
									140.18
									97.12
									67.83
									95.24
									150.85
									80.81
									84.33
									137.14
									78.16
									106.73
									160.77
									86.2
									42.59
									131.36
									110.48
									106.73
									71.88
									85.61
									89.91
									150.95
									99.05
									67.4
									82.06
									129.41
									92.22
									97.12
									75.62
									124.55
									120.47
									115.67
									124.38
									106.94
									129.75
									107.75
									99.7
									106.67
									53.33
									102.5
									81.53
									96.45
									96.37
									82.41
									67.83
									115.86
									77.14
									77.14
									147.05
									129.52
									143.2
									105.64
									121.25
									95.24
									95.47
									94.32
									100.57
									133.98
									119.07
									67.4
									76.19
									121.25
									126.63
									89.67
									78.54
									114.54
									111.07
									105.85
									130.03
									116.61
									83.64
									102.93
									141.57
									94.63
									68.15
									105.92
									122.97
									68.68
									154.7
									105.92
									132.9
									146.6
									133.28
									108.29
									88.93
									162.88
									70.24
									112.04
									86.2
									87.7
									108.29
									110.48
									72.78
									87.7
									88.93
									89.67
									68.68
									116.11
									102.36
									106.94
									123.91
									132.02
									154.27
									148.38
									121.55
									132.68
									126.81
									119.62
									140.49
									58.27
									148.38
									69.93
									84.59
									80.99
									114.29
									148.77
									132.02
									123.91
									164.52
									132.08
									97.12
									95.47
									103.63
									147.94
									125.31
									148.23
									78.16
									186.82
									100.86
									122.97
									91.43
									103.63
									163.99
									164.52
									124.03
									129.41
									132.68
									86.37
									73.28
									113.14
									113.07
									129.75
									89.91
									132.08
									105.37
									116.05
									126.63
									139.5
									102.86
									133.33
									117.36
									90.87
									102.57
									141
									116.61
									183.21
									90.55
									86.87
									113.14
									122.68
									73.18
									131.08
									189.14
									136.56
									60.23
									111.26
									107.88
									64.87
									124.79
									131.36
									110.74
									119.01
									118.65
									46.5
									101.44
									94.24
									80.99
									79.55
									58.15
									58.15
									124.38
									131.58
									129.75
									177.71
									62.01
									132.08
									83.55
									90.87
									153.33
									134.63
									102.22
									121.49
									105.92
									66.53
									66.64
									114.16
									122.14
									83.55
									125.77
									75.14
									87.7
									99.34
									111.52
									144.81
									141
									152.38
									93
									126.12
									139.87
									167.36
									118.65
									37.52
									113.27
									107.88
									77.14
									100.57
									139.03
									154.27
									101.44
									137.35
									90.31
									136.4
									122.68
									64.76
									62.01
									121.07
									136.56
									70.86
									94.63
									116.11
									126.81
									113.65
									73.97
									62.01
									57.14
									132.08
									57.14
									128.06
									107.28
									159.55
									135.65
									126.63
									91.75
									82.41
									148.77
									66.64
									102.36
									105.09
									132.24
									124.79
									102.93
									135.12
									100
									111.07
									121.49
									92.22
									134.69
									141.72
									110.48
									100
									126.63
									119.32
									109.88
									84.59
									62.01
									113.65
									121.25
									79.55
									63.4
									112.49
									114.16
									132.24
									103.63
									134.79
									114.29
									58.27
									96.37
									116.3
									137.41
									124.96
									98.31
									38.29
									120.47
									147
									99.7
									107.34
									57.14
									78.54
									87.95
									133.33
									138.04
									79.27
									115.17
									140.49
									91.75
									79.27
									139.87
									128.91
									102.36
									137.62
									70.04
									67.83
									75.42
									94.63
									42.59
									144.81
									77.14
									113.27
									97.57
									140.54
									126.63
									98.31
									107.75
									99.34
									100.57
									111.26
									120.47
									124.96
									131.19
									107.82
									141.57
									72.78
									56.63
									113.27
									124.38
									100
									101.44
									107.75
									122.68
									95.54
									116.05
									90.55
									136.56
									146.6
									102.22
									103.63
									110.74
									105.92
									99.05
									157.72
									102.22
									118.1
									97.35
									66.64
									120.47
									140.49
									77.14
									49.67
