# Supplementary material for: Secondary metabolites of Hülle cells mediate protection of fungal reproductive and overwintering structures against fungivorous animals
Source: eLife. 2021 Oct 12;10:e68058. doi: 10.7554/eLife.68058 (PMC8510581; doi:10.7554/eLife.68058)
Supplement: Figure 5—source data 1. [file elife-68058-fig5-data1.xlsx]

## Sheet: source data 1
	Fig. 5b: Cleistothecia diameter after 10 days of sexual development
	Cleistothecium diameter/ µm
	wt		∆mdpG		∆mdpF		∆mdpC		∆mdpL		∆mdpD		∆xptA		∆xptB		∆xptC
	42.59		83.55		35.12		73.18		118.34		46.03		150.08		142.34		126.63
	61.07		99.12		153.76		81.53		123.09		87.04		139.5		89.91		93
	149.69		166.1		72.28		65.54		115.86		100		162.43		107.28		133.77
	133.77		130.03		97.35		78.44		92.77		166.97		153.57		121.49		160.05
	130.31		119.26		118.28		110.48		81.79		78.44		100.21		110.94		169.17
	142.79		95.92		139.71		111.07		113.14		26.94		178.89		119.56		129.58
	184.95		121.49		156.75		88.85		104.61		29.01		178.56		152.48		141
	202.19		96.15		183.25		87.7		96.15		100		131.08		129.75		113.07
	205.86		118.65		71.57		108.42		146.36		85.18		159.14		134.63		132.08
	164.21		90.31		187.02		154.13		118.65		119.62		146.36		118.34		138.51
	145.81		149.01		167.66		35.94		150.95		113.14		152.57		97.12		166.97
	125.66		110.48		116.11		109.09		75.14		87.7		95.24		158.95		126.12
	184		136.29		87.04		97.35		79.55		122.68		132.68		174.49		145.56
	66.64		98.31		64.65		98.83		116.11		121.01		138.04		144.01		70.86
	207.33		91.75		94.09		89.26		145.81		132.02		161.67		114.6		170.37
	151.23		157.85		165.4		113.65		113.27		104.61		129.52		107.34		106.94
	112.49		80.81		167.01		35.12		103.63		147.94		151.71		112.82		192.79
	177.42		37.52		108.42		116.11		121.55		142.79		67.83		117.36		66.64
	116.86		135.28		169.9		142.64		140.18		186.08		82.41		119.07		130.92
	105.64		145.86		180.98		96.97		142.23		131.19		166.1		129.75		159.14
	150.13		162.74		101.44		115.86		78.54		121.01		125.77		123.09		126.81
	154.7		149.01		148.18		105.09		54.94		156.24		157.72		96.15		138.67
	176.48		108.29		166.97		35.94		142.79		166.4		161.71		111.07		193.54
	145.06		161.71		147.15		43.44		57.14		157.07		140.49		95.24		90.87
	135.12		124.38		151.71		60.23		148.62		151.81		141.72		130.42		56.25
	184.28		97.35		177.26		79.55		129.52		152.38		165.4		148.23		152.24
	145.06		142.79		145.46		106.73		171.81		142.79		157.72		133.33		154.13
	144.81		113.65		157.72		70.04		132.02		126.18		158.77		136.56		133.28
	116.86		138.67		113.65		40.5		164.87		121.55		154.7		165.97		159.5
	173.74		145.81		112.04		177.58		102.5		178.52		111.07		190.48		133.33
	141		118.16		159.91		183.25		132.68		170.24		121.55		75.04		116.61
	179.09		102.5		116.05		112.82		121.25		156.38		124.38		146.36		151.71
	121.96		166.97		126.12		77.14		73.97		138.51		135.65		108.96		106.73
	104.61		141.72		174.49		86.37		129.41		156.38		131.08		125.77		141
	119.32		156.33		129.52		80.99		90.87		130.03		138.04		87.04		110.74
	151.23		162.43		180.98		81.79		105.92		125.77		92.77		83.9		107.88
	169.21		113.27		141.77		129.75		88.93		142.64		154.13		70.86		132.02
	159.14		140.18		83.55		78.54		149.35		69.93		156.33		143.4		126.63
	144.81		164.34		143.4		147.2		144.81		131.58		154.27		102.57		137.62
	95.24		98.31		159.5		155.45		135.12		144.56		167.79		124.79		188.48
	115.86		164.87		177.79		88.61		129.75		124.03		126.86		101.44		167.36
	158.04		157.49		134.79		115.86		156.33		151.81		138.09		135.12		143.2
	175.11		141.72		171.43		94.63		107.75		132.08		151.71		147.94		156.33
	137.99		127.72		134.69		129.3		124.03		168.7		137.35		159.14		162.74
	184.95		117.36		105.64		121.01		118.16		139.87		139.71		128.51		144.01
	132.24		182.1		85.61		73.28		158.45		144.81		134.63		141.36		149.01
	153.76		149.93		78.54		87.7		131.36		170.58		150.27		123.62		112.49
	167.36		136.4		159.5		78.44		69.93		129.41		113.07		128.06		169.9
	158.95		152.38		90.87		110.74		120.47		151.71		143.6		64.87		113.27
	191.27		177.26		63.86		85.61		133.98		148.38		139.87		84.59		174.78
	135.28		138.67		143.15		64.87		169.17		155.45		30.48		62.48		172.1
	144.81		176.48		146.36		69.93		167.1		137.41		148.23		78.54		162.43
	204.19		128.06		127.32		102.93		117.36		128		166.32		68.68		127.32
	230.25		164.34		172.74		77.14		99.05		151.71		115.17		63.4		139.71
	140.18		169.9		116.11		86.87		107.82		148.38		144.81		94.63		156.24
	189.79		159.5		81.53		97.57		121.25		169.73		151.09		90.55		122.85
	130.31		135.65		29.75		73.28		121.01		157.72		156.38		81.53		81.44
	126.63		182.58		171.22		126.86		149.93		164.52		137.62		106.73		129.3
	203.3		158.77		159.55		100		83.64		181.74		150.95		95.24		139.87
	122.14		169.9		171.22		198.68		102.93		137.35		167.01		96.37		131.58
	143.2		138.09		184.44		91.75		145.81		137.62		97.94		114.29		144.81
	183.25		93		138.51		114.6		102.5		155.63		140.54		75.62		100.57
	121.07		144.81		147		78.16		173.28		118.65		137.62		110.74		140.49
	152.38		141.41		140.18		80.36		97.12		126.86		130.31		115.17		137.41
	141.77		164.34		149.01		52.92		131.53		83.9		153		97.12		135.65
	189.79		169.9		125.31		93.7		160.05		156.61		124.96		113.65		45.87
	170.58		136.56		141.41		161.71		134.69		170.11		110.74		89.18		83.64
	151.09		155.12		164.91		75.42		137.35		143.76		127.15		61.43		119.56
	186.36		174.45		140.49		90.87		95.47		167.36		157.49		113.14		150.95
	144.01		121.9		154.27		132.02		124.38		136.56		162.74		128.91		142.23
	159.14		121.55		131.19		54.54		61.43		152.24		137.35		125.77		143.76
	131.08		123.62		134.69		69.93		144.01		163.85		97.57		126.86		201.94
	96.97		148.23		167.01		88.85		139.5		142.64		115.86		68.68		181.46
	123.91		94.32		135.28		89.26		83.9		134.69		110.48		126.63		113.07
	84.59		132.24		156.61		32.77		100.65		136.56		116.61		164.21		110.74
	67.4		178.56		155.45		94.32		143.4		166.97		102.93		129.3		119.62
	86.87		111.07		129.75		60.23		153.33		107.88		124.03		112.56		121.96
	94.32		160.23		164.83		118.65		113.07		156.75		107.82		126.63		100.57
	228.6		113.14		115.86		124.38		124.79		137.41		190.48		99.7		95.31
	80.09		186.04		129.41		48.79		39.22		173.91		132.24		153.76		112.04
	113.65		160.23		122.85		66.53		127.78		119.01		144.01		159.55		138.51
	158.54		114.35		121.07		84.59		132.24		144.01		173.74		122.68		165.26
	122.68		178.11		109.69		145.86		89.18		144.81		118.34		41.03		149.01
	202.87		177.71		141.57		124.03		93.39		154.13		138.04		132.24		161.98
	147.05		135.12		166.97		64.87		73.18		133.33		159.14		107.82		190.82
	90.31		175.61		126.81		107.82		114.35		154.13		128.06		112.49		133.33
	180.66		167.62		150.08		126.18		122.14		179.09		129.41		64.87		161.85
	116.3		148.57		96.97		92.22		122.85		159.14		122.85		108.35		150.85
	169.17		181.1		152.38		116.55		100		131.19		107.88		126.86		122.68
	124.96		175.4		173.74		160.23		126.81		124.38		148.77		110.74		175.78
	195.14		145.21		73.18		127.78		133.77		172.27		149.35		120.47		70.04
	238.67		150.13		119.32		78.54		164.34		167.36		155.49		133.98		166.32
	150.13		146.36		156.38		48.49		61.07		163.85		60.23		119.26		132.68
	114.29		67.4		145.06		103.63		134.69		140.49		167.79		109.15		80.72
	81.53		158.95		165.4		51.82		97.12		109.09		145.86		124.03		133.06
	155.12		114.16		147.05		27.73		129.36		172.1		164.52		163.99		169.73
	156.38		153.76		155.49		128.91		145.56		129.3		148.77		110.48		209.21
	184		95.24		45.87		68.68		94.63		111.07		147.94		129.52		154.7
	219.37		87.7		37.71		54.14		110.48		141.77		177.58		175.24		176.76
	128.06		158.77		29.75		105.92		138.51		148.23		124.38		94.24		154.27
	156.89		175.4		132.24		100.65		106.73		158.95		142.64		144.96		105.64
	218.61		166.32		173.74		97.57		89.26		164.87		118.52		114.29		164.52
	156.38		139.76		138.67		86.87		136.4		124.38		132.24		107.55		116.3
	167.1		155.63		161.44		119.01		119.62		151.81		164.87		95.47		97.57
	161.71		126.18		112.04		71.57		113.65		136.4		128.91		123.91		143.76
	172.1		112.04		141.41		59.63		125.94		140.54		108.29		134.79		197.55
	100.57		187.6		86.2		85.61		129.75		185.89		120.47		135.97		106.73
	185.89		189.14		169.73		86.87		68.68		186.36		148.23		142.79		187.95
	73.18		147.2		126.63		73.97		122.68		131.53		121.49		104.05		194.25
	145.81		98.9		164.12		62.01		73.57		156.61		128.91		113.65		141.16
	183.25		184.44		158.95		138.04		129.75		148.38		137.35		138.51		135.01
	104.61		172.15		119.07		35.94		109.15		156.38		160.05		118.34		86.87
	119.01		148.38		145.86		57.27		87.95		145.46		115.86		109.69		172.1
	89.26		186.04		84.33		87.04		82.24		207.26		121.96		109.88		76.67
	172.74		58.27		139.87		185.54		97.35		201.94		81.79		112.04		123.91
	156.24		198.86		79.27		105.92		141		142.23		120.47		121.25		94.32
	140.49		179.09		125.77		83.9		115.17		149.35		109.69		105.92		156.61
	167.66		156.61		118.52		183.85		119.62		165.4		95.24		158.77		183.25
	152.48		143.4		110.74		74.85		89.26		151.71		145.56		142.79		113.14
	118.16		151.66		147		149.35		105.09		172.15		151.71		110.74		105.37
	205.86		148.77		135.12		170.24		132.02		130.31		174.49		105.09		154.27
	101.44		169.08		91.59		100.57		97.57		156.61		192.3		73.28		169.9
	188.18		223.73		126.86		142.64		142.79		114.16		59.51		151.66		32.77
	140.07		154.13		163.05		105.85		106.73		144.81		148.38		95.54		139.76
	145.81		175.28		130.19		80.99		75.62		128.06		119.62		169.17		181.94
	133.77		117.6		171.43		103.63		112.04		145.81		162.07		145.81		161.62
	151.71		154.27		127.78		93		66.53		143.2		118.65		153.57		113.07
	110.48		175.11		160.23		113.27		138.67		182.58		180.66		162.21		166.97
	163.05		184		137.35		114.16		129.58		51.11		148.38		105.64		106.26
	173.16		161.71		146.36		95.24		129.75		158.54		149.93		158.95		177.58
	35.12		152.38		38.29		82.41		135.28		80.09		145.56		148.23		151.09
	114.6		96.97		107.28		39.22		70.86		162.07		135.65		107.88		143.4
	82.41		143.2		159.55		120.47		66.53		150.13		149.35		127.78		121.55
	185.89		124.79		92.06		104.61		120.47		145.56		128.51		171.47		156.33
	171.43		114.35		154.13		136.56		108.96		183.25		83.55		140.95		164.91
	162.74		157.72		155.49		74.85		143		159.14		143.4		108.29		143.76
	151.23		193.95		133.98		107.75		139.71		144.01		167.49		135.65		104.05
	73.28		90.87		105.37		149.01		106.12		149.01		141.77		112.49		137.67
	201.94		158.54		127.32		129.75		108.29		152.38		156.89		143.15		64.65
	127.78		89.67		130.31		62.01		86.37		138.67		97.57		100		172.27
	107.55		88.61		128		132.24		140.18		164.12		144.81		97.12		102.5
	196.81		189.44		171.89		59.51		142.79		141		125.77		76.19		178.36
	80.72		109.88		157.35		98.31		142.79		137.35		163.05		137.35		143
	175.61		164.87		145.06		143.76		114.29		108.96		147.15		137.41		94.63
	109.88		137.41		85.95		82.41		152.24		118.65		144.81		123.91		103.63
	169.17		133.98		78.54		88.61		115.17		137.41		111.07		129.58		140.07
	124.38		180.66		156.38		206.03		97.12		142.79		92.22		141.36		152.38
	166.97		187.64		103.98		63.86		122.68		139.76		109.15		72.38		156.75
	180.66		121.25		100		76.57		67.4		186.36		137.35		110.48		47.73
	152.24		167.79		121.07		59.26		175.4		153.57		136.4		153.24		158.45
	156.38		161.98		157.07		99.12		93.7		115.86		138.51		145.56		102.5
	75.62		126.63		150.13		64.65		83.2		123.91		138.04		138.09		198.86
	155.07		113.27		151.81		111.07		136.29		156.33		100.65		153.57		95.24
	141.57		119.32		154.7		113.65		92.77		146.36		146.36		105.64		102.93
	186.82		180.66		88.93		148.38		119.62		180.98		72.48		116.3		164.87
	128.91		140.54		122.85		35.94		158.45		150.27		124.38		133.06		97.35
	218.61		111.52		161.71		102.57		61.43		138.51		64.76		143.15		62.01
	196.66		177.71		110.74		72.78		150.71		165.26		134.69		133.06		30.71
	157.07		135.97		175.11		96.15		149.79		156.38		126.12		134.69		94.32
	96.15		140.18		78.44		100.65		172.27		159.09		132.24		127.32		89.26
	172.27		185.77		119.01		181.1		141.41		161.85		132.9		143.2		95.92
	187.6		177.58		139.5		151.71		119.01		156.61		164.52		140.49		161.85
	100.57		125.94		154.13		94.63		148.57		192.52		140.54		95.24		135.12
	135.12		163.59		141		36.14		138.51		153.57		107.75		114.16		97.57
	179.09		160.05		167.36		71.17		142.79		113.07		123.91		141.72		153.38
	128		157.07		180.7		109.69		116.61		119.01		143.4		129.3		115.17
	145.06		149.01		160.18		70.04		151.09		162.43		105.64		124.03		87.7
	136.4		183.85		181.74		97.35		116.11		95.24		151.66		126.18		35.94
	136.29		145.46		129.36		160.59		126.18		131.19		73.18		85.61		103.63
	127.78		154.13		137.41		76.19		61.43		142.79		113.27		96.15		107.55
	191.08		127.32		157.07		100.57		150.71		169.17		124.79		129.41		134.79
	153.76		134.63		126.63		41.21		128		153.57		132.24		97.35		62.83
	176.76		102.5		148.23		27.47		104.61		153.76		146.56		120.47		70.24
	175.9		161.71		140.18		80.36		98.31		135.28		78.16		135.28		154.7
	245.5		113.07		41.03		117.36		129.41		134.2		136.4		71.57		86.2
	165.4		131.53		143.76		118.65		91.75		169.9		168.7		82.24		128.91
	129.41		166.1		158.04		85.18		116.3		124.09		144.81		124.09		116.11
	95.54		128.51		123.91		91.59		107.82		124.38		168.7		140.95		113.07
	89.18		163.99		150.32		89.91		113.65		88.85		118.34		107.34		131.36
	118.65		174.07		144.81		98.31		144.01		133.39		100		139.71		132.08
	126.23		133.55		80.36		108.29		163.81		122.14		169.08		82.41		128
	146.56		140.54		194.62		124.38		178.11		105.64		132.68		98.83		158.54
	71.17		154.7		134.69		113.27		109.09		123.09		129.41		107.82		129.75
	139.5		142.79		143.4		100		38.85		153.24		149.35		114.29		167.01
	99.34		191.08		61.43		65.1		70.04		140.49		159.5		160.23		83.55
	254.13		131.36		149.01		30.71		167.1		141.72		130.03		145.81		157.07
	212.04		170.11		92.77		157.72		135.28		127.72		116.61		130.03		135.12
	160.05		151.71		201.15		135.12		133.33		167.01		148.57		132.02		147.94
	182.58		126.12		151.66		81.79		173.74		115.86		177.79		63.4		169.9
	165.97		145.06		160.72		24.39		72.78		126.86		124.96		115.67		184.28
	147		153.57		91.51		102.5		132.08		110.74		97.57		145.81		175.49
	146.56		135.12		100		94.63		123.38		127.32		94.63		112.04		137.41
	174.45		144.81		83.64		144.56		145.46		147.05		86.37		130.03		138.67
	154.13		224.89		150.95		168.18		105.37		115.86		130.03		135.65		146.56
	142.64		188.18		115.86		56.63		172.74		91.59		169.9		119.01		109.69
	156.19		171.43		143		85.61		111.07		180.98		183.17		97.35		149.35
	112.56		102.5		147.05		70.24		113.27		89.26		124.38		71.57		136.29
	184.95		105.92		151.71		104.05		146.36		59.26		73.97		136.56		172.1
	143.76		197.55		162.07		92.22		81.53		99.34		163.59		83.9		89.26
	142.34		186		170.37		40.5		102.93		119.62		136.56		121.49		107.82
	142.23		91.75		122.85		154.7		148.77		100		80.81		121.25		145.86
	217.68		172.1		168.31		94.09		156.89		80.36		136.4		108.29		160.23
	178.52		211.28		143.6		180.98		107.75		148.38		122.68		129.75		135.28
	141.16		205.36		145.06		144.81		124.03		105.92		170.11		166.32		145.06
	84.59		127.78		140.49		168.01		97.12		121.55		161.71		150.95		114.35
	148.38		175.78		179.09		59.63		132.68		124.38		94.24		130.31		98.9
	169.21		145.06		172.61		121.25		133.28		167.36		102.93		97.57		171.13
	166.97		148.77		182.1		85.18		67.5		151.09		185.14		126.63		100.57
	124.38		98.9		184.79		199.74		141.57		145.81		139.87		132.24		184.32
	148.38		157.72		150.71		157.07		94.63		158.95		153.76		153.14		177.71
	119.32		160.72		202.87		86.87		75.04		121.49		133.28		143.76		35.12
	158.95		163.99		192.18		130.19		126.81		144.01		127.78		107.28		165.4
	165.26		160.05		124.38		90.87		111.07		159.55		130.31		116.05		132.02
	145.86		136.56		123.09		124.03		112.04		121.49		164.87		143		159.5
	132.02		194.7		138.09		111.26		81.53		156.89		164.87		112.56		124.79
	155.45		122.68		158.59		112.82		126.81		163.99		122.68		182.3		177.79
	216.1		97.35		160.77		106.67		92.14		161.71		118.52		129.41		112.56
	150.71		185.14		140.49		109.95		138.09		170.11		102.57		105.37		175.11
	180.7		153.57		181.94		103.63		153.57		143.76		154.7		75.62		105.09
	199.41		63.4		73.18		122.68		118.65		167.1		58.02		148.57		161.62
	89.91		122.44		172.15		100.86		151.23		132.9		116.3		90.55		84.59
	113.07		140.54		146.36		115.17		140.18		107.28		102.86		122.44		184.79
	130.03		102.93		135.28		100		125.66		115.86		195.92		162.07		161.98
	106.26		162.07		178.11		88.85		135.28		122.68		147		103.63		93.7
	133.77		172.4		177.87		94.32		124.79		124.38		92.22		128.06		122.44
	188.18		115.86		194.62		97.65		89.26		188.18		173.74		93.7		161.62
	174.78		182.9		143.4		81.79		86.37		133.33		134.79		44.43		134.63
	173.28		129.58		147.94		100		127.32		171.6		136.29		113.27		166.97
	243.84		155.49		78.54		105.92		124.96		162.43		156.61		124.79		126.18
	154.09		282.26		119.01		126.12		148.77		80.81		102.57		117.6		48.79
	154.13		165.05		167.36		112.56		138.04		147.05		171.22		102.36		151.71
	188.56		183.89		127.78		83.64		126.86		160.05		144.96		116.61		129.75
	104.81		151.09		122.68		116.55		88.61		158.54		92.22		172.27		128.06
	51.25		203.19		38.29		37.71		62.01		110.74		154.27		124.38		155.07
	60.23		162.07		130.03		58.02		114.29		175.49		92.14		118.65		149.01
	92.14		104.81		116.86		99.34		139.71		122.68		111.26		135.28		135.28
	197.29		178.89		134.79		70.86		149.93		159.5		100.65		104.61		103.63
	136.56		152.38		128		78.54		73.18		87.95		124.96		96.97		158.54
	72.78		140.49		119.01		94.63		154.27		210.11		126.81		113.27		167.27
	164.21		130.31		77.14		125.31		152.24		204.8		151.71		111.26		91.59
	152.38		156.89		137.35		67.83		114.6		200.5		134.63		135.65		149.35
	148.18		117.36		78.16		35.12		116.61		94.32		153.24		110.48		186
	133.33		154.37		180.66		87.7		78.54		127.15		199.74		177.26		110.74
	197.69		140.49		130.03		111.26		144.01		157.85		159.55		83.9		100.57
	123.09		110.48		121.07		92.22		173.28		80.81		90.87		151.71		103.63
	99.7		149.79		130.19		105.92		121.07		103.98		92.22		68.68		116.55
	191.31		169.17		113.65		106.12		128.06		140.07		157.07		155.45		131.08
	141.77		127.32		132.68		153.24		85.61		160.77		139.5		94.32		165.97
	143		121.96		140.49		102.86		94.63		173.16		157.72		137.62		148.23
	196.11		146.36		131.19		186.2		99.7		160.77		141.57		101.44		162.07
	116.11		148.77		174.45		118.16		144.81		174.45		161.71		141		166.97
	135.01		59.51		163.63		108.35		114.16		129.75		147.15		161.62		178.56
	191.43		121.49		143.4		115.86		121.25		159.14		102.57		143.4		107.75
	188.22		94.24		170.24		179.69		107.88		169.73		167.36		107.55		138.09
	192.18		135.65		143.4		64.65		40.5		167.01		224.37		47.73		92.06
	121.73		105.37		83.55		97.57		116.3		119.62		160.18		105.85		160.41
	208.41		100.86		155.49		134.2		150.85		151.66		150.13		116.3		141.77
	212.96		137.62		163.05		78.44		154.13		161.71		168.65		148.57		100.86
	197.99		80.36		85.18		57.14		94.63		167.66		86.87		115.86		151.71
	161.85		156.24		139.5		95.54		70.24		106.73		170.75		107.75		161.44
	83.55		115.67		180.5		100.57		152.48		118.34		74.85		140.18		138.51
	106.26		134.69		171.81		98.31		94.63		179.69		58.15		108.96		133.33
	110.74		186.82		174.45		96.15		139.76		140.49		145.06		116.61		201.15
	129.52		197.99		118.34		94.09		117.6		124.03		57.14		144.01		124.03
	171.43		156.19		183.17		73.28		143.4		157.49		179.09		164.87		181.46
	100		132.02		92.14		104.61		104.61		199.45		106.73		142.64		166.1
	102.93		156.19		116.61		94.09		128.06		137.35		88.85		138.51		94.09
	157.49		116.11		170.58		105.85		114.54		138.51		127.78		137.62		217.98
	79.27		148.18		109.09		43.44		72.78		173.16		124.96		68.15		162.74
	94.24		63.4		117.66		109.88		59.14		167.79		125.77		132.24		164.12
	117.6		141.16		111.07		184.95		115.67		136.13		53.87		72.48		136.13
	165.57		153.76		142.79		106.73		114.29		151.71		80.09		105.64		168.31
	172.48		128.06		103.63		73.97		101.44		184.12		100		127.32		119.26
	167.49		133.33		161.62		150.32		141.77		156.24		102.36		177.42		110.48
	175.61		184		134.63		100.57		158.45		178.52		118.65		102.5		154.09
	151.66		161.98		102.93		78.54		96.97		132.02		121.25		67.4		94.09
	102.86		138.04		161.62		68.68		126.86		170.58		118.52		88.85		105.92
	196.66		121.25		180.5		105.92		145.81		152.48		129.75		120.47		152.38
	167.1		110.94		145.06		105.92		131.08		138.46		134.69		149.93		121.49
	103.63		138.04		137.35		124.96		164.34		164.87		137.62		116.61		140.07
	150.08		141		56.63		48.49		113.14		106.73		111.07		102.57		171.22
	119.56		193.54		140.95		102.93		134.79		137.62		147.94		73.18		129.52
	201.15		177.58		107.34		137.62		133.39		141.16		149.93		78.16		120.47
	139.71		48.79		150.95		95.47		60.23		202.05		99.7		156.61		139.76
	183.17		162.21		102.93		203.62		145.46		167.36		105.92		95.47		128.06
	161.13		162.21		143.4		96.15		51.82		189.79		149.35		120.47		167.1
	188.48		196.81		124.03		81.53		134.69		131.08		137.35		147.05		198.86
	150.71		195.63		163.63		70.24		131.08		175.49		122.68		121.01		121.07
	165.97		148.77		84.59		84.16		113.27		184.63		178.89		136.4		109.95
	186.2		128.91		107.75		92.22		145.46		160.77		115.86		149.01		159.18
	64.87		155.12		108.96		127.15		89.18		213.23		168.7		121.25		127.78
	156.61		129.52		129.52		166.97		78.54		137.35		143		119.56		138.04
	191.43		93.7		124.55		81.79		157.49		208.1		164.87		162.07		189.18
	102.57		140.07		114.29		61.43		154.13		145.86		164.87		177.71		124.96
	221.15		169.9		110.74		67.4		127.32		148.77		150.85		150.85		139.87
	179.69		126.12		192.18		78.54		86.87		152.38		126.63		107.88		172.1
	144.96		160.18		57.14		65.76		99.34		142.34		134.69		137.62		140.18
	152.38		165.4		132.68		77.14		81.53		120.47		138.51		147.94		105.85
	38.1		160.41		97.65		64.76		91.59		119.01		151.71		81.79		158.95
	189.48		186.82		109.09		88.93		61.07		132.24		140.18		131.08		164.83
	111.52		64.76		156.19		100.57		95.54		148.62		128.91		102.22		133.33
	167.79		180.66		138.04		104.61		150.27		91.43		159.5		117.36		134.2
	167.79		111.07		78.16		87.7		113.27		103.63		147.05		134.63		90.87
	139.87		131.36		133.98		69.93		158.45		141		116.61		159.18		138.67
	168.18		163.99		169.73		111.07		98.9		114.6		80.81		142.23		148.57
	193.12		190.48		148.38		108.29		78.16		140.07		156.61		151.09		131.36
	203.94		154.7		169.9		216.47		143		205.86		156.33		150.95		145.86
	84.16		161.98		144.01		185.54		83.9		85.61		141.72		68.15		136.4
	202.19		196.66		137.62		96.37		165.97		111.07		186.78		86.37		134.79
	109.95		115.86		137.35		86.37		141.77		161.98		131.53		106.73		100
	110.48		161.71		115.17		100.65		96.37		161.71		152.43		126.12		139.71
	120.29		96.97		151.66		80.81		146.36		176.27		126.63		132.68		114.29
	75.14		143.76		86.87		93.39		134.2		155.49		102.93		106.12		119.56
	77.14		112.56		149.69		100.57		133.39		109.95		140.49		152.43		164.87
	207.16		136.56		106.67		48.49		141.72		123.09		140.95		99.05		173.78
	148.38		110.48		140.07		68.99		131.36		168.7		133.06		85.61		143.4
	229.74		94.09		102.57		97.12		151.66		119.01		140.95		83.55		116.61
	141.41		109.69		127.72		78.16		111.26		104.61		136.13		136.56		113.14
	162.43		164.52		116.55		98.83		91.51		132.9		121.49		116.05		112.56
	99.7		133.98		94.09		54.54		77.14		156.38		154.7		136.77		80.99
	153.24		95.54		159.14		73.97		97.65		161.71		151.66		133.28		144.81
	194.25		144.81		148.57		109.95		123.62		156.33		99.7		83.64		110.74
	129.41		152.81		83.55		137.67		127.78		152.24		141		107.55		112.56
	189.14		170.07		111.26		183.06		127.78		168.01		157.49		114.6		118.34
	153.57		176.15		133.33		88.93		71.57		85.61		168.01		38.1		108.29
	151.71		115.17		161.67		114.29		107.82		99.05		142.79		60.23		144.01
	164.83		178.52		145.81		91.75		118.34		172.48		169.73		70.04		49.67
	173.91		135.65		199.59		157.49		134.69		144.81		118.65		97.12		153.24
	128.06		200.75		157.49		111.26		124.96		157.72		102.36		105.92		128.06
	83.9		175.4		123.09		191.58		91.75		164.87		114.16		121.96		156.75
	138.04		137.35		149.01		76.67		105.37		147.94		142.79		150.13		136.4
	193.95		98.9		151.71		123.62		94.09		143.4		184.95		83.55		122.68
	112.82		73.28		126.18		56.25		115.17		154.7		129.75		137.2		121.96
	141		64.76		111.26		67.5		105.92		188.18		151.71		133.77		97.57
	51.11		32.77		165.4		97.12		80.81		41.21		157.49		144.96		114.35
	148.23		126.63		102.93		115.86		96.15		168.7		115.86		133.28		139.76
	195.81		70.86		164.34		146.36		146.01		159.18		136.56		130.31		115.86
	160.23		121.01		164.87		133.33		124.96		143.15		153.57		93.7		146.36
	183.25		94.09		86.37		57.14		137.35		132.51		167.27		119.01		105.92
	150.13		119.26		145.81		54.14		77.14		150.85		163.85		59.51		161.44
	117.36		197.1		157.35		108.42		169.17		82.41		70.24		113.65		121.73
	160.05		98.83		115.86		174.07		129.58		108.96		35.12		124.79		63.4
	145.46		167.1		103.14		166.4		162.43		92.22		147.94		147		107.75
	112.04		134.63		157.07		87.7		108.29		69.93		129.3		100.65		111.26
	68.15		97.57		184.79		104.81		140.54		99.7		150.95		114.29		143.2
	92.14		91.43		158.59		91.59		138.51		116.61		163.63		47.12		128.06
	215.5		99.34		132.02		53.06		130.03		143.76		175.61		137.62		78.44
	144.81		148.23		166.1		116.11		141		95.24		105.09		132.68		129.3
	114.6		190.48		168.4		178.56		128.91		148.38		148.57		105.92		89.91
	89.26		178.52		170.58		99.34		138.51		134.69		95.24		138.67		126.86
	149.4		168.7		141.16		95.92		121.01		150.95		169.21		121.9		67.4
	155.45		119.26		146.01		99.34		132.68		130.03		170.75		162.88		150.32
	247.38		161.71		168.31		195.22		148.23		99.7		139.5		165.05		88.61
	142.23		141		126.81		111.07		111.26		136.4		100.57		129.75		109.88
	75.04		146.56		170.11		81.79		98.31		126.86		85.61		139.71		145.81
	105.37		137.62		159.14		83.55		148.23		115.86		85.18		110.54		124.38
	97.94		133.55		187.29		117.36		122.85		63.86		179.82		92.14		161.85
	155.63		147.94		111.26		64.87		122.68		132.02		162.07		150.95		166.97
	197.1		186.04		195.92		78.54		66.64		102.57		145.56		110.48		109.69
	118.65		167.01		151.71		127.78		85.61		109.09		105.09		105.92		125.77
	151.71		185.89		145.81		108.96		170.24		88.93		154.13		121.49		190.51
	252.15		153.76		173.74		83.64		96.97		102.5		160.59		145.86		99.7
	105.09		143.76		85.95		76.29		136.56		187.6		115.17		116.05		83.64
	157.07		155.4		143		142.34		167.49		101.22		105.92		141.72		137.41
	132.68		147		81.53		103.63		102.22		136.77		83.64		146.36		183.02
	89.91		90.87		96.15		182.9		88.85		115.17		154.13		151.66		140.49
	136.13		102.93		188.18		110.48		88.93		135.28		92.22		157.85		158.54
	132.02		156.75		159.18		194.02		134.63		126.63		119.26		114.29		80.81
	165.97		170.24		119.32		154.13		48.79		119.01		143		126.86		141.77
	133.39		133.82		180.98		52.92		64.87		109.88		137.62		133.06		145.06
	157.72		148.38		138.67		124.55		77.14		111.26		111.26		85.18		191.73
	197.66		145.81		169.21		121.73		82.41		105.92		166.97		100		98.31
	183.85		177.21		134.63		80.09		113.07		137.41		167.36		54.14		157.72
	243.45		184.44		35.12		77.14		111.26		151.66		121.96		108.96		132.9
	148.77		118.65		72.78		70.24		79.27		126.63		153.24		124.03		145.06
	142.64		155.63		132.24		109.88		102.57		153.57		164.87		149.35		147
	121.49		162.07		124.96		50.11		111.26		212.82		137.62		65.1		196.81
	148.77		172.1		188.56		161.98		137.62		124.03		154.27		156.33		108.96
	144.81		150.85		164.52		181.62		87.95		129.75		122.68		99.7		148.77
	138.51		104.05		130.03		132.02		134.79		120.47		151.71		74.85		174.49
	84.59		163.99		150.32		168.31		76.67		165.4		148.18		95.24		163.99
	133.55		134.69		112.04		121.55		75.62		210.11		148.38		84.33		153.57
	186.82		140.07		167.36		83.55		106.73		154.27		51.82		67.4		79.27
	175.78		128		132.02		71.88		66.53		186		147.94		71.57		184.95
	192.79		156.89		45.87		91.75		137.99		207.85		121.25		78.16		113.27
	188.64		145.06		156.24		98.9		131.36		155.07		129.3		95.24		105.37
	130.19		116.3		82.24		93		118.52		197.1		158.95		135.12		132.24
	155.49		121.01		163.05		120.47		140.07		102.5		138.67		70.04		172.1
	150.71		150.95		146.36		207.44		121.73		181.1		97.12		137.41		157.85
	150.13		137.62		45.87		62.01		114.29		155.45		146.56		145.06		137.41
	70.86		116.05		126.86		121.25		143.2		202.48		167.27		117.66		169.21
	91.75		113.27		104.81		108.96		156.89		61.43		145.56		107.82		183.85
	69.93		115.86		161.98		83.9		116.11		199.63		103.63		46.5		155.49
	187.02		121.96		126.18		94.09		79.27		191.43		132.24		105.37		134.79
	150.08		162.74		178.36		138.67		113.07		157.85		133.28		148.18		137.41
	133.98		145.06		150.13		42.59		117.36		74.85		80.09		137.2		145.56
	190.93		115.17		172.15		42.59		110.48		159.14		118.34		121.07		117.36
	124.96		114.29		137.14		54.94		136.4		39.77		119.01		99.7		143.76
	195.89		72.78		139.76		95.31		127.15		119.62		160.18		81.79		137.35
	128.91		86.95		116.3		118.65		129.3		164.87		157.49		81.79		57.27
	177.58		172.27		132.24		127.32		83.9		162.21		143.4		58.15		121.07
	151.66		138.04		126.63		76.19		146.56		122.68		158.54		99.12		112.56
	59.51		118.34		137.99		102.93		104.61		190.4		151.66		109.15		148.77
	133.39		140.18		192.52		113.07		85.95		173.16		151.66		124.38		156.61
	103.98		118.16		157.49		99.34		100.57		167.79		101.44		60.23		128.06
	106.73		117.6		180.7		113.27		97.57		148.38		138.04		41.21		143.76
	100		95.24		61.43		91.75		111.26		77.14		102.93		129.75		163.99
	102.93		158.59		177.21		80.09		106.73		141.72		105.09		86.87		116.11
	149.01		164.87		108.96		102.57		61.43		123.91		152.24		121.55		156.75
	142.23		156.24		139.5		76.29		119.56		80.36		62.83		105.64		139.87
	123.09		199.92		137.62		82.24		160.72		170.58		143.2		62.01		94.63
	102.93		133.98		157.72		87.95		121.96		34.5		139.5		71.57		51.82
	108.96		173.16		67.83		132.24		107.34		70.24		157.49		85.18		124.96
	68.68		169.73		169.73		101.44		137.35		194.29		116.61		114.35		60.23
	117.6		121.96		121.01		98.31		137.41		121.96		145.56		121.96		116.11
	99.34		112.49		169.9		70.04		67.4		197.99		166.97		146.36		138.04
	148.18		172.74		132.24		59.51		114.35		144.81		94.09		110.54		111.07
	118.65		96.15		111.07		100.57		130.31		178.56		113.27		132.02		124.03
	80.81		164.12		65.54		83.55		102.5		152.38		116.11		107.88		147.94
	62.48		82.06		97.57		116.61		59.63		109.88		159.14		99.7		154.27
	86.87		125.94		150.13		83.9		112.49		195.48		153.33		125.77		48.49
	83.55		141.57		64.87		113.27		159.55		180.66		121.96		149.01		69.93
	94.63		126.63		94.63		188.18		95.54		169.17		156.61		128.91		140.18
	137.14		140.95		102.93		161.98		112.49		178.56		119.07		90.87		129.58
	136.56		113.65		138.04		109.69		114.35		138.04		131.08		80.81		108.96
	84.59		160.77		156.61		109.88		88.85		167.79		140.49		99.34		114.16
	105.09		139.71		162.43		54.14		121.01		169.73		100		116.61		170.75
	133.33		129.75		64.87		76.19		64.87		188.48		145.56		149.69		148.18
	94.63		143.76		124.96		175.11		105.37		162.43		109.88		102.22		165.26
	130.31		141		158.95		99.05		113.27		179.09		150.08		75.62		148.38
	121.96		109.88		162.43		109.09		147.05		179.05		136.56		143.4		124.96
	113.65		131.53		119.32		37.71		116.11		132.08		138.04		76.67		100
	95.54		173.74		157.72		115.86		144.81		227.36		126.12		124.38		177.09
	102.36		189.25		138.09		78.54		159.5		194.58		145.06		54.14		160.23
	116.3		156.75		170.58		89.26		76.67		135.12		134.69		73.18		189.25
	113.65		121.9		180.5		121.96		75.42		193.54		99.7		78.54		112.04
	111.26		129.3		147.94		81.44		83.2		167.79		126.63		103.63		143.2
	97.12		166.97		56.25		58.02		95.24		169.17		139.03		78.54		171.22
	129.75		126.63		197.1		53.47		151.09		187.6		40.5		114.16		159.14
	107.82		119.26		56.25		73.97		135.65		163.05		115.17		154.7		125.77
	121.25		132.24		95.24		107.88		53.87		154.27		157.07		140.54		188.18
	148.38		182.1		129.75		73.28		115.67		145.06		144.01		113.27		197.55
	125.31		141.72		140.95		147.15		66.53		144.81		108.96		105.85		143.2
	132.68		175.61		152.09		74.85		132.68		134.79		155.49		65.54		132.24
	140.49		148.57		126.81		118.1		83.9		136.29		124.03		163.59		156.24
	121.07		106.12		165.97		107.75		99.7		180.18		66.53		99.7		140.49
	150.13		138.04		80		93.7		92.14		179.09		141.41		128.51		127.15
	115.86		187.02		140.07		62.01		105.85		162.21		143.15		78.44		132.24
	133.28		168.01		199.74		80		146.36		146.36		170.75		121.49		109.88
	120.47		211.28		132.02		76.67		91.59		107.28		125.66		163.85		132.02
	136.56		145.06		122.85		97.65		137.62		132.02		91.75		85.18		99.7
	133.28		129.58		155.45		113.14		147.15		158.77		126.18		67.4		129.3
	155.12		155.63		86.37		96.37		120.47		182.9		145.06		131.58		155.49
	171.43		138.67		88.93		71.17		72.78		204.8		132.08		126.81		141.77
	145.06		167.1		123.91		108.29		105.64		212.52		172.27		144.01		175.11
	48.79		117.6		159.14		92.06		132.08		163.05		144.01		145.81		45.87
	127.78		132.08		115.86		209.63		102.5		134.79		183.25		102.93		132.02
	103.98		130.42		64.87		137.62		100		167.01		112.49		114.54		171.43
	152.38		152.48		129.36		100		141.77		103.98		108.96		131.36		151.09
	133.06		94.09		132.68		125.66		123.91		132.9		145.56		50.11		114.35
	148.77		186.36		148.23		107.55		135.97		146.56		141.72		91.75		103.98
	153.33		124.38		154.7		82.41		100.65		180.66		145.81		141.36		166.97
	165.4		180.66		145.56		150.08		42.59		167.27		84.59		110.74		147.94
	134.2		150.95		132.08		110.48		121.07		153.57		94.09		113.07		145.46
	124.79		82.41		161.67		80.09		129.58		121.49		126.81		167.1		97.12
	148.18		191.73		158.59		124.38		127.78		65.54		145.46		94.63		59.26
	164.83		119.56		132.02		113.27		80.36		123.91		149.35		92.06		83.55
	132.68		177.58		137.99		75.42		114.29		150.85		160.77		156.61		142.79
	137.35		150.95		169.17		80.72		118.65		162.43		114.6		121.55		59.14
	143		138.04		154.7		42.59		124.96		189.14		145.86		98.83		115.86
	141.41		188.22		84.33		210.9		137.62		168.74		94.09		75.62		174.49
	129.3		129.41		162.43		58.15		107.28		137.41		160.05		104.61		121.25
	142.79		169.17		169.9		114.35		134.79		171.43		103.63		84.59		138.04
	78.54		157.49		148.38		173.28		80.99		227.36		135.12		113.27		122.68
	111.07		126.18		146.56		93		123.62		116.61		139.87		53.06		147.94
	138.67		177.58		120.47		96.97		128.91		121.49		107.55		118.34		142.79
	106.73		139.5		127.32		175.78		138.67		133.33		99.34		82.41		151.09
	126.63		149.79		95.24		179.09		76.19		197.69		126.86		100		166.97
	91.75		152.38		157.07		32.77		132.68		84.59		156.89		62.83		121.49
	161.67		150.08		94.32		100		102.36		140.49		122.68		96.97		75.62
	160.72		152.09		159.14		77.14		126.23		152.38		121.49		91.75		107.82
	148.38		113.27		124.03		102.93		97.35		90.31		88.85		126.63		177.87
	132.68		156.38		129.41		119.56		104.61		154.27		138.67		95.24		106.94
	61.07		126.86		153		73.97		91.51		119.56		90.87		116.05		136.77
	143.4		107.88		155.45		100.57		106.73		64.65		124.96		43.44		136.13
	145.81		128		156.61		53.33		155.07		164.87		144.56		86.37		92.06
	149.93		115.86		150.85		169.9		111.07		169.9		156.89		171.43		116.3
	134.69		177.79		138.67		91.75		148.77		179.41		157.07		124.96		87.7
	164.47		137.35		123.38		80.09		83.9		116.55		157.85		102.93		138.09
	155.49		182.1		152.38		108.29		145.56		72.78		120.47		113.65		123.09
	148.38		191.73		61.43		48.79		83.64		126.81		119.56		91.51		119.32
	84.59		151.09		80.36		118.65		124.96		175.61		153.57		124.79		178.89
	150.08		153.76		153		79.27		148.57		187.95		124.38		84.33		66.53
	144.56		157.72		169.73		83.55		54.94		105.09		160.23		144.01		153.57
	141.72		179.05		168.4		71.88		89.18		200.5		107.55		112.56		127.78
	140.49		188.87		139.5		88.36		80.99		86.87		84.33		162.07		170.24
	138.51		121.25		149.01		100		121.25		169.21		202.48		73.97		158.04
	161.67		127.15		115.3		63.4		97.12		199.99		136.4		150.13		186.36
	145.86		160.05		112.49		73.18		124.38		184.79		172.95		107.75		115.67
	169.21		204.44		198.1		93.39		143.15		216.37		131.19		35.94		126.63
	180.98		192.64		142.64		97.65		121.73		154.27		159.5		140.54		107.82
	190.93		105.09		68.68		46.03		60.95		140.49		154.27		142.34		44.59
	172.61		117.36		140.07		40.5		131.19		151.71		118.34		97.12		180.7
	184.28		145.81		51.82		57.27		116.11		132.9		154.7		94.63		180.66
	175.61		178.56		116.11		100.57		182.9		178.52		155.45		151.09		141.77
	153.57		158.95		151.71		110.74		144.81		124.38		130.19		142.64		150.13
	155.07		170.58		99.34		147.94		145.06		157.85		167.36		161.71		57.14
	159.55		149.79		113.14		113.07		110.48		187.44		116.61		89.91		155.49
	165.97		138.04		122.68		108.96		110.74		179.69		95.24		78.54		153.24
	128.06		123.38		113.65		97.94		139.5		88.85		119.01		113.27		156.61
	113.65		145.06		109.88		79.27		126.63		138.67		94.32		124.03		94.32
	103.98		153.33		111.52		134.69		119.07		151.66		122.44		111.07		161.71
	114.35		144.01		135.65		32.55		93		78.54		151.23		140.18		109.88
	201.18		114.6		149.4		107.34		129.52		189.44		120.29		129.58		143
	135.28		137.35		137.35		197.58		109.09		164.87		181.1		122.97		107.55
	177.42		134.69		200.21		92.14		122.44		128		109.95		121.96		138.04
	172.27		117.66		166.97		162.74		145.86		138.04		116.61		163.85		177.58
	115.86		118.34		180.7		32.77		86.37		106.67		159.91		145.06		141.77
	163.85		154.27		148.38		103.49		147.94		172.27		123.91		136.29		70.24
	206.03		149.35		137.62		188.22		91.43		175.49		49.52		140.54		179.69
	119.56		178.56		148.77		68.15		163.63		178.36		153.38		129.41		224.54
	153.57		137.62		151.66		81.53		118.65		154.37		136.29		113.65		152.24
	125.66		213.23		109.69		116.61		144.81		177.87		140.49		123.62		110.48
	104.05		187.6		171.22		67.5		145.56		168.01		73.18		121.49		124.03
	99.7		119.32		158.95		81.79		157.85		184.44		129.75		162.43		141
	130.19		131.36		87.7		109.09		141.72		144.81		142.79		121.96		112.49
	139.71		203.94		156.75		118.34		86.87		99.34		128.91		116.61		152.81
	113.65		133.06		152.38		107.75		141		168.4		159.14		154.27		148.57
	140.49		178.11		125.77		193.54		106.73		177.87		151.23		126.63		143.6
	72.78		129.75		115.86		136.77		137.35		173.16		138.67		170.24		150.85
	140.18		169.73		176.72		61.54		112.04		163.99		93		123.09		125.31
	99.7		181.74		163.85		151.81		151.09		155.4		141.16		68.68		125.66
	152.43		121.49		136.29		117.66		124.96		185.14		162.43		143.4		105.64
	129.41		158.54		151.71		57.14		82.41		177.87		58.02		149.4		155.49
	58.15		185.89		167.1		133.28		161.98		147.05		125.77		140.18		170.24
	158.59		145.21		147		141.36		93		128		114.35		97.35		174.45
	126.63		124.96		144.01		96.15		115.86		165.57		130.31		154.7		167.36
	149.35		124.96		163.05		86.87		127.32		105.92		171.47		80.81		144.01
	188.48		120.47		124.96		159.18		107.75		86.37		126.86		138.67		99.34
	167.79		160.05		145.46		185.14		130.92		159.14		146.56		148.18		140.18
	137.35		147.94		93.7		215.67		86.37		177.26		135.65		109.15		138.67
	155.49		158.04		134.63		92.06		114.29		84.33		154.27		132.9		117.6
	116.61		201.15		131.19		80.81		105.92		161.67		187.6		102.57		109.69
	168.7		147.94		145.56		157.49		139.5		137.35		113.07		119.26		85.18
	103.63		138.51		92.22		86.87		54.14		102.57		141.41		97.57		151.71
	146.01		121.55		130.03		184.12		87.7		165.4		147.94		116.55		89.18
	122.85		172.74		151.71		186.78		150.13		176.76		128.91		125.94		137.35
	160.77		128.06		148.38		130.42		130.31		153.57		86.87		165.05		141.41
	143.4		115.17		134.69		92.14		120.47		152.09		124.38		69.52		130.42
	103.63		123.91		154.09		41.03		87.7		163.85		137.62		116.05		171.22
	35.12		189.14		102.22		97.57		109.09		137.41		137.2		122.68		104.05
	97.35		131.19		152.43		62.83		141.77		129.52		112.04		94.32		192.79
	100		96.15		100.57		155.07		102.5		128		160.77		128.06		157.49
	155.49		150.32		67.4		51.82		166.97		91.75		158.77		121.96		120.47
	165.4		151.23		186.71		29.75		90.87		125.31		130.31		118.16		117.36
	134.2		155.45		134.2		163.63		116.61		133.06		170.37		148.18		191.73
	155.63		163.05		151.23		102.93		95.54		143.4		119.62		148.77		159.18
	111.07		89.18		106.94		89.91		106.94		172.27		125.31		129.41		147
	153.57		163.85		167.27		96.15		94.63		114.29		133.28		97.57		101.22
	114.16		145.46		192.64		175.24		70.86		179.09		157.49		130.31		130.31
	145.86		138.04		143		151.71		88.93		163.85		134.79		141		126.86
	151.09		136.29		125.71		64.65		99.7		110.74		146.36		115.86		118.65
	148.38		203.94		128.91		105.92		99.7		125.31		119.62		137.41		119.26
	139.87		156.38		100.57		61.54		98.83		192.52		164.52		135.65		139.71
	73.97		156.38		116.3		58.27		117.66		137.35		142.64		143.76		40.5
	91.75		146.01		171.47		91.51		91.75		172.27		141.72		128.91		147.05
	84.59		136.29		134.63		90.87		90.31		143.4		81.79		112.11		110.74
	112.56		107.34		109.09		181.46		112.04		150.27		110.74		159.5		160.05
	116.86		159.91		148.38		105.85		86.37		178.89		96.15		130.19		101.22
	100		145.56		140.49		80.09		60.23		159.55		175.61		144.01		100
	102.36		174.49		105.85		175.24		148.18		196.66		131.19		63.4		145.86
	170.58		194.29		175.9		78.54		160.77		177.26		140.18		133.28		134.2
	186.04		169.21		124.03		51.82		99.7		205.04		146.36		109.88		121.96
	121.49		160.77		138.51		72.48		139.03		162.43		106.73		156.33		144.81
	121.96		62.01		139.76		100.65		99.7		107.55		87.7		105.37		171.43
	152.24		214.69		161.71		109.15		122.68		61.07		134.79		158.77		135.28
	102.93		145.56		157.07		77.7		124.03		143.76		118.52		179.09		137.62
	107.55		148.18		197.66		89.26		102.5		169.21		138.04		151.71		120.47
	138.04		113.27		158.04		63.4		81.53		193.42		129.75		80.36		147.15
	107.34		178.52		158.04		103.98		153.33		201.94		83.55		150.85		163.85
	150.95		133.33		142.34		41.21		162.74		134.79		142.64		119.26		145.86
	187.95		64.76		120.47		99.34		89.91		159.5		107.88		83.9		135.28
	175.28		91.59		188.18		114.35		144.01		194.29		138.04		114.6		158.77
	170.37		154.7		135.28		156.38		83.55		119.56		131.19		163.59		100
	157.35		131.19		137.41		81.79		75.62		105.64		126.63		141.77		97.35
	149.35		117.66		147.94		37.52		137.62		151.71		126.18		146.01		153.57
	148.77		124.96		141.77		94.32		88.93		129.3		67.4		131.36		181.46
	171.13		148.18		137.2		48.19		138.04		108.29		138.04		118.65		159.55
	172.74		159.55		160.05		78.54		129.41		175.61		178.52		158.59		175.11
	180.66		119.01		101.44		75.04		157.07		183.89		159.55		118.65		229.21
	174.78		167.27		140.18		91.59		100.57		86.87		167.36		100.57		91.59
	150.08		99.34		144.81		126.86		145.56		198.13		145.81		143		161.67
	96.97		193.54		78.16		70.24		143		67.83		82.41		153.57		140.95
	116.11		175.11		126.63		143.4		127.32		164.52		86.37		73.97		188.87
	136.56		152.38		97.35		99.34		73.97		153.57		121.07		131.36		180.7
	135.12		159.5		192.79		113.07		149.01		177.26		157.07		132.02		127.32
	150.27		91.59		95.24		96.15		90.55		123.09		158.95		103.63		150.85
	141.57		64.87		105.92		85.18		122.85		146.56		102.57		111.07		94.09
	173.74		109.69		142.79		189.6		115.86		180.7		93.7		97.12		141.72
	166.1		145.06		163.99		51.11		116.61		165.26		100.65		116.61		179.09
	160.18		186.04		134.79		68.68		139.5		64.87		100.57		116.05		139.5
	151.23		156.93		112.04		69.52		127.78		172.48		118.65		175.4		177.09
	114.35		185.73		143.6		48.79		101.44		130.19		148.77		94.09		156.24
	159.5		153.57		192.18		70.86		122.44		124.38		156.33		94.63		172.1
	185.38		199.88		89.26		84.33		83.9		133.33		145.81		83.55		146.56
	99.34		128.06		143.6		191.73		159.18		76.29		93.39		122.85		186.82
	140.18		145.21		140.49		136.13		141		157.35		159.18		119.26		127.32
	125.77		102.57		50.83		113.07		109.69		149.93		84.16		92.14		100
	106.73		98.31		115.3		75.14		113.14		72.78		142.79		148.18		138.67
	81.53		81.53		46.5		109.88		140.95		72.78		165.4		139.5		155.45
	136.4		118.16		158.45		110.74		152.48		152.24		87.7		142.79		188.22
	169.21		136.56		153.76		88.93		124.03		88.93		115.86		143.2		143.4
	185.73		223.6		163.99		97.65		62.48		163.63		163.05		95.47		115.67
	119.01		112.56		92.22		68.68		104.05		210.39		134.2		101.65		111.26
	115.86		173.78		150.95		88.85		67.4		78.54		154.37		136.29		128
	177.87		156.75		135.28		228.22		87.04		169.17		129.75		107.82		145.86
	143.15		162.74		135.65		85.95		86.87		128		121.55		146.36		163.05
	102.5		137.41		68.68		151.81		98.83		143.4		106.73		124.79		158.45
	203.62		114.6		102.22		184.28		144.81		164.87		124.55		72.78		145.06
	66.53		133.28		88.85		192.52		59.51		109.15		153.76		130.03		105.92
	136.56		128		114.16		169.9		51.82		71.88		175.28		183.89		192.79
	135.12		141.41		160.77		166.1		110.74		93.7		115.86		134.2		156.33
	156.24		161.98		131.08		196.81		77.14		97.35		143.2		151.66		158.54
	144.81		115.86		96.45		105.64		156.61		180.66		154.27		105.92		104.05
	119.01		181.62		90.31		101.44		143		113.07		114.16		161.85		98.83
	114.29		156.61		94.09		103.49		162.07		179.09		149.4		104.61		126.18
	88.36		155.12		161.67		112.04		119.56		104.81		174.49		170.11		142.23
	148.38		137.14		44.59		119.01		123.09		94.63		100.57		133.77		102.5
	134.69		165.26		150.08		80.99		102.57		127.32		101.44		134.79		121.55
	179.09		170.24		132.08		57.65		102.93		98.31		140.07		88.93		106.67
	154.7		198.68		127.32		35.12		121.25		141.72		159.14		143.6		90.55
	165.97		164.87		128.91		38.1		152.38		153		144.01		112.56		151.71
	169.17		166.1		114.29		56.63		82.41		207.96		116.61		142.79		124.96
	135.01		121.55		149.93		202.44		56.25		150.95		140.49		110.74		138.04
	206.59		165.4		108.96		174.45		136.4		169.17		173.78		113.27		134.69
	170.24		143		88.36		75.9		164.83		185.77		141		157.72		103.98
	130.03		159.5		206.03		67.4		80.81		166.1		153		150.95		117.36
	182.58		89.26		146.6		95.24		97.12		98.83		121.55		153.57		156.38
	166.97		147.05		174.78		38.85		110.74		189.14		106.94		135.65		105.09
	179.69		146.01		173.28		76.19		131.08		166.1		86.37		94.09		59.63
	170.75		140.18		182.1		88.61		85.61		192.3		113.65		131.19		124.03
	164.83		86.2		120.47		69.93		166.1		77.14		109.88		44.59		105.92
	112.11		139.87		179.09		151.71		105.37		156.38		113.27		113.07		117.36
	124.79		116.05		118.52		75.9		155.63		100		88.93		147.94		152.09
	113.27		103.98		151.66		156.75		125.77		114.29		83.55		97.94		95.24
	152.24		102.5		67.4		201.9		138.04		146.36		113.27		150.71		138.67
	144.56		118.65		167.27		81.53		146.56		97.35		131.36		143.2		118.34
	160.18		192.52		127.72		128		100.21		132.08		154.27		119.62		148.18
	152.24		153.24		106.12		170.58		129.75		125.31		159.14		86.87		151.09
	128		173.74		102.22		102.57		66.64		192.18		82.24		97.12		113.65
	178.52		154.27		177.21		110.48		127.78		101.44		183.49		157.72		140.49
	167.27		138.67		128.91		153.57		144.21		192.52		191.27		161.67		146.01
	148.77		143.4		133.98		213.88		155.07		106.73		128.51		140.18		97.35
	169.08		129.52		105.64		64.76		131.19		107.34		180.98		132.08		140.49
	172.48		125.66		145.56		106.73		118.65		174.49		165.26		158.77		114.29
	183.21		121.01		129.58		105.37		126.63		118.34		80.81		148.77		59.14
	144.81		199.34		143.15		128.91		143.76		135.12		160.77		116.3		140.49
	183.02		128		129.52		80.09		88.85		162.74		176.11		119.56		143.76
	160.72		108.35		118.65		211.69		137.41		180.5		132.24		67.4		131.36
	122.85		92.77		161.62		124.55		78.16		148.77		152.38		112.04		198.1
	148.57		116.3		170.24		87.95		173.74		196.62		95.47		95.54		126.63
	156.24		169.9		144.81		94.32		104.81		141.72		159.5		161.62		133.77
	135.28		161.71		114.35		154.7		142.23		92.14		112.04		164.87		164.52
	190.82		149.35		106.12		86.2		172.27		153.24		132.08		153		167.27
	148.38		133.06		135.28		110.94		110.74		199.34		138.46		138.51		134.69
	147.2		170.37		129.3		60.23		143.15		177.21		121.96		129.58		147.15
	150.27		127.32		195.14		113.07		165.26		132.08		201.94		114.29		167.1
	68.15		179.09		172.27		62.01		131.08		119.62		155.07		121.49		169.9
	160.23		132.02		174.45		121.01		116.11		111.26		100.21		138.04		172.27
	157.72		140.95		168.01		68.68		124.96		119.32		42.59		157.85		150.71
	144.56		130.19		148.77		127.32		67.4		220.46		159.09		141		86.2
	149.4		149.35		88.61		145.56		131.08		191.73		78.16		160.77		160.18
	129.52		118.34		133.28		117.36		62.01		159.55		145.56		155.07		167.01
	151.23		105.85		139.5		72.48		130.42		170.58		108.29		128.91		97.35
	126.23		159.18		119.62		137.35		112.04		160.77		111.07		139.87		174.07
	167.49		131.36		124.03		70.04		130.31		147		151.09		113.27		139.76
	109.15		138.09		179.69		129.58		67.5		76.19		93		137.62		163.05
	97.12		127.78		202.48		128.91		128.06		84.59		112.04		157.07		105.09
	126.18		151.66		139.03		118.52		142.79		162.74		102.5		121.25		142.34
	132.68		151.71		102.57		123.91		148.77		138.67		161.71		134.2		172.15
	131.08		149.01		105.37		94.32		107.88		124.96		117.36		106.94		153.57
	135.12		180.66		162.88		202.8		87.04		155.45		124.38		115.86		128.91
	162.74		143.76		186.36		96.45		129.41		122.97		156.89		62.48		148.77
	128.91		194.44		145.06		108.29		90.87		130.31		173.16		83.9		88.85
	166.4		162.43		116.86		62.48		147.05		32.77		120.47		89.91		118.34
	158.54		169.9		180.66		112.04		141.77		159.55		129.75		142.34		121.25
	127.32		180.66		89.26		66.53		129.75		206.28		126.86		147.94		98.83
	181.46		147		129.41		83.64		129.52		132.51		118.52		116.11		157.49
	108.96		122.85		145.46		114.86		165.4		173.74		123.38		116.61		190.21
	149.35		184.79		126.63		209.52		136.56		138.04		129.3		110.74		68.15
	126.23		153.38		172.74		170.24		137.62		162.07		111.26		124.96		173.16
	148.18		96.97		160.05		68.15		86.87		154.09		129.3		114.16		32.77
	150.32		167.1		136.56		121.25		78.16		191.31		176.11		121.07		156.19
	129.41		151.09		166.1		93.7		117.36		121.25		83.9		105.92		133.06
	131.08		117.66		151.66		90.87		140.18		166.32		145.56		89.18		141.77
	132.9		178.56		135.12		97.12		113.27		146.36		156.24		100.57		157.85
	143.4		140.18		148.57		77.04		128		92.22		147.94		125.77		164.52
	145.86		121.25		79.27		118.1		136.56		170.24		97.94		156.89		196.11
	134.69		155.49		123.62		110.74		144.01		94.63		159.14		128.06		152.24
	64.87		137.41		146.6		205.04		94.32		122.68		160.77		110.74		131.19
	131.36		146.01		149.35		119.01		79.27		119.01		150.13		149.35		97.35
	124.38		133.28		172.74		58.15		96.37		145.46		129.36		65.54
	146.56		135.01		167.1		83.64		115.17		175.11		107.88		126.86
	163.59		148.38		187.02		163.05		108.29		126.86		139.76		95.24
	134.79		100.65		124.38		83.9		193.54		118.52		141.77		72.78
	115.17		176.27		146.56		115.86		115.17		167.79		141.77		167.36
	121.49		122.68		172.27		119.01		150.95		116.11		169.9		138.67
	131.58		132.24		161.85		83.64		96.15		183.25		119.62		130.31
	157.72		161.62		145.86		210.73		107.88		130.19		112.56		104.61
	145.06		197.58		147		130.31		65.54		71.17		137.35		123.91
	132.24		152.24		132.24		99.05		98.83		175.28		116.05		151.23
	144.81		141		126.23		97.57		116.3		91.59		145.06		107.88
	141.72		94.63		124.03		126.18		165.97		114.6		145.06		122.85
	145.86		134.69		132.9		98.31		117.6		125.31		158.95		110.48
	138.04		153.33		144.81		51.82		176.11		141.41		132.08		186.08
	164.52		154.27		133.33		215.77		165.4		168.4		130.19		151.66
	107.55		151.71		121.07		51.82		68.68		50.83		153.57		144.01
	166.97		167.1		135.65		29.75		75.9		155.45		48.49		141.41
	90.55		122.68		175.78		90.55		95.24		144.21		179.09		145.81
	95.54		153.57		138.04		98.83		80.99		165.97		115.17		102.22
	80.72		126.63		154.27		141		60.23		127.78		153.57		113.65
	133.28		82.06		148.18		51.11		113.07		127.72		162.07		115.86
	126.63		165.4		105.64		161.44		153.57		70.24		127.32		119.62
	159.14		183.85		175.78		62.48		138.67		129.41		135.12		126.12
	141		108.96		152.38		170.58		84.59		102.5		132.9		103.14
	129.41		161.71		142.34		80.99		70.04		97.57		111.26		112.49
	162.07		153.24		129.52		42.08		110.74		65.54		144.56		169.17
	135.28		114.16		165.4		76.19		107.55		116.11		128.06		139.87
	133.33		146.01		157.85		109.88		113.65		134.69		132.08		107.88
	116.3		140.07		157.07		124.79		107.55		138.67		147.94		98.83
	159.09		169.21		157.35		126.63		86.95		133.55		132.02		126.86
	132.68		172.48		147.05		89.91		83.9		102.5		138.09		106.73
	129.75		135.65		113.27		80.81		107.82		90.55		151.09		90.31
	132.08		113.65		196.62		210.39		110.74		92.14		109.09		157.07
	136.56		97.65		172.74		107.82		108.42		95.24		146.36		68.68
	106.73		121.73		143.4		103.49		160.18		128.91		129.75		94.32
	132.02		139.03		103.63		83.2		116.11		70.24		103.63		118.65
	149.01		119.32		154.13		89.91		117.6		132.08		154.27		105.92
	134.2		145.81		115.86		97.12		133.77		67.83		77.14		97.12
	176.11		110.48		110.48		151.71		76.57		51.11		95.47		107.82
	143.4		118.65		172.27		70.86		156.75		75.04		217.18		65.1
	140.18		166.32		117.66		30.71		122.85		100		207.33		109.95
	148.38		143.15		157.07		104.61		145.81		38.1		85.61		132.24
	147.94		130.31		145.86		153.57		100.21		104.61		144.21		114.35
	121.25		175.49		148.38		76.57		54.94		99.7		154.13		124.38
	105.37		211.28		145.86		94.09		140.07		81.53		135.28		151.71
	107.82		112.56		119.07		123.09		143.45				162.74		156.61
	100.57		153.33		140.18		121.25		112.56				134.79		105.09
	153.76		194.25		124.38		147.05		147				153.24		112.49
	109.95		137.35		134.69		29.75		140.95				146.36		143.76
	146.56		141.41		102.93		108.29		73.28				156.24		84.59
	127.78		195.81		183.89		83.9		134.79				132.02		90.87
	132.24		110.74		149.4		95.24		116.11				93		135.28
	141.72		144.81		124.79		142.79		114.54				137.35		77.14
	115.67		173.91		80.99		70.24		143				116.86		121.96
	121.01		70.04		128.06		77.14		108.29				141.41		154.13
	119.62		153.57		109.69		96.37		97.12				126.63		115.17
	121.07		129.75		148.18		75.04		80.36				165.97		133.33
	117.66		116.61		73.28		148.18		126.12				126.63		121.25
	145.46		210.73		135.65		77.7		118.16				145.86		101.65
	98.9		138.04		88.93		89.91		120.47				158.54		69.93
	59.14		98.9		179.82		125.66		78.16				94.09		148.57
	91.75		143		144.21		97.12		131.19				166.97		150.95
	165.4		187.6		159.55		76.19		165.26				186.82		105.37
	115.17		127.15		108.29		114.35		134.79				139.5		126.86
	153.57		187.4		34.07		92.22		148.57				99.7		103.49
	172.48		162.74		144.56		168.74		125.94				158.77		148.38
	102.57		118.16		129.52		131.58		144.81				146.36		152.09
	176.76		121.25		106.73		117.66		109.69				133.33		62.83
	166.1		153.33		150.95		60.23		175.61				164.87		89.26
	173.91		119.01		170.37		121.25		97.12				142.23		150.08
	169.9		68.68		105.85		100.57		145.56				153		102.57
	180.62		70.04		118.16		78.44		145.81				183.17		188.18
	172.74		160.72		113.14		93		104.05				148.38		151.09
	128.06		143.2		158.54		107.82		111.26				131.08		94.63
	170.24		118.65		183.25		79.27		68.68				141.77		121.96
	147.05		178.56		177.58		116.61		115.86				99.34		120.47
	175.4		153.57		145.86		163.85		75.04				158.45		73.97
	184.95		129.3		119.56		56.63		148.18				158.77		95.24
	172.48		167.01		88.61		72.38		75.9				155.07		166.1
	155.63		70.04		124.03		47.12		132.24				171.43		122.85
	105.09		102.57		167.36		123.62		105.09				128		107.75
	160.77		176.11		132.02		102.22		111.07				115.86		119.62
	91.51		77.14		140.49		104.81		118.34				151.09		122.85
	130.31		91.75		100.57		149.01		87.04				144.81		114.6
	101.44		177.87		132.08		98.31		126.12				141.77		138.04
	135.12		198.86		188.48		73.28		103.49				140.49		81.53
	119.32		120.47		154.7		115.86		132.51				118.52		138.51
	168.7		172.74		121.25		113.27		113.27				50.11		132.24
	167.79		134.79		162.07		95.92		126.81				148.38		125.77
	132.24		161.98		168.74		95.24		138.67				67.4		124.79
	187.4		176.11		183.49		97.12		90.87				114.29		146.6
	103.98		134.69		101.44		97.12		120.47				113.14		135.01
	154.7		122.68		162.74		97.94		121.25				179.09		75.42
	146.6		35.12		157.07		102.5		113.07				92.14		143.76
	149.4		143.2		145.81		110.74		124.96				112.04		83.9
	196.66		119.26		145.56		90.31		151.66				153.38		73.18
	149.93		123.91		145.81		73.28		108.29				85.18		102.5
	143		93		149.93		91.75		159.14				150.95		126.63
	151.66		142.23		158.45		90.55		99.34				116.3		133.33
	181.1		148.77		163.99		119.56		107.28				82.41		48.79
	150.08		148.77		97.12		113.65		140.18				164.87		46.03
	111.26		156.38		124.03		68.68		147.15				73.28		80.36
	139.87		154.13		117.36		80.99		153.57				86.87		109.15
	138.09		126.81		149.93		60.23		48.79				98.9		116.11
	126.63		105.09		132.02		88.85		180.5				177.26		127.72
	147		113.07		137.62		114.29		102.93				143		121.25
	149.01				164.87		118.65		140.95				145.21		140.07
	194.29				70.86		96.97		140.95				146.01		126.81
	203.19				115.86		81.53		135.12				153.24		150.27
	132.02				98.31		196.81		88.85				124.38		107.28
	137.41				129.75		100.65		53.87				151.71		147.2
	121.07				97.57		101.44		125.77				88.93		121.96
	124.38				141.57		56.25		161.62						156.38
	114.6				151.81		158.54		114.29						136.77
	113.65				154.27		188.87		92.14						117.66
	49.67				140.07		102.57		129.3						112.04
	147.05				155.45		87.7		68.15						119.26
	165.97				146.01		83.55		96.15						115.17
	97.35				86.87		111.26		168.74						145.21
	157.35				143.6		118.65		150.95						153.33
	137.99				150.95		92.69		59.26						153.57
	106.26				90.31		107.88		126.81						127.78
	98.31				65.54		115.17		114.6						80.36
	121.96				175.61		84.59		137.41						164.34
	124.55				128.91		81.44		134.79						113.14
	92.22				110.48		100.65		42.59						98.31
	108.96				115.86		58.27		126.86						141.77
	106.73				116.61		70.24		114.54						141
	112.04				148.57		237.6		123.38						133.98
	129.52				79.27		52.92		114.35						127.78
	145.06				145.06		29.75		89.18						107.34
	89.67				182.94		89.91		135.65						142.64
	80.36				168.4		73.97		160.18						130.03
	76.67				112.49		70.04		111.07						121.25
	70.04				88.36		102.22		107.55						170.11
	92.22						112.49		120.47						132.68
	53.87						88.61		108.96						140.18
	153.24						86.2		96.97						101.22
	145.21						131.58		113.07						113.65
							78.54		123.09						91.75
							118.65		86.95						137.99
							59.63		143						160.18
							104.61		103.98						141.41
							79.27		98.31						150.95
							70.24		118.34						79.27
							183.17		110.94						67.4
							77.14		92.22
							102.36		119.01
							105.09		107.88
							109.95		145.06
							58.15		68.68
							162.07		168.01
							104.61		73.97
							64.76		112.04
							97.65		119.62
							111.07		144.81
							91.75		76.19
							51.25		94.09
							65.1		160.18
							76.19		110.74
							83.55		94.63
							150.08		126.81
							123.09		82.41
							42.59		119.26
							165.4		152.57
							159.55		107.88
							114.35		80.81
									140.07
									124.38
									65.54
									152.09
									97.57
									76.19
									140.07
									68.15
									87.95
									145.86
									108.42
									109.69
									99.7
									177.09
									92.22
									85.61
									107.88
									114.29
									89.26
									41.03
									160.23
									124.38
									110.54
									167.1
									115.67
									115.86
									133.28
									128.06
									135.65
									81.53
									124.03
									113.14
									119.62
									125.77
									102.36
									148.38
									132.51
									121.01
									105.09
									108.96
									102.93
									124.79
									131.36
									53.87
									145.86
									86.87
									121.96
									151.66
									135.12
									128
									154.13
									119.62
									124.03
									108.96
									95.54
									148.57
									157.85
									148.18
									148.57
									92.22
									128.91
									144.81
									86.87
									112.49
									142.79
									104.81
									151.71
									138.46
									135.65
									82.41
									140.54
									137.35
									113.14
									116.61
									76.29
									130.42
									78.16
									162.43
									150.85
									128.91
									82.06
									184.79
									128.91
									133.28
									145.86
									147
									155.45
									115.86
									114.35
									116.3
									89.26
									110.74
									85.61
									107.82
									117.6
									158.45
									85.61
									63.86
									121.07
									115.86
									81.53
									157.85
									87.62
									86.2
									109.15
									118.1
									113.14
									87.7
									121.01
									129.52
									121.96
									134.69
									153.33
									158.59
									143.6
									66.64
									134.69
									114.35
									122.68
									135.28
									85.18
									143
									64.87
									86.87
									138.67
									202.91
									129.58
									141.41
									139.5
									80.99
									97.12
									86.95
									148.77
									109.95
									131.36
									99.7
									43.44
									102.57
									146.56
									119.62
									160.77
									143.15
									108.96
									66.64
									121.49
									131.58
									161.71
									120.47
									107.28
									135.12
									119.56
									142.79
									149.01
									118.65
									53.06
									110.74
									73.28
									101.44
									105.37
									148.38
									128.06
									102.22
									95.54
									115.86
									172.48
									154.27
									111.26
									44.59
									124.79
									68.99
									121.01
									160.18
									137.14
									121.01
									102.57
									65.54
									121.25
									93.39
									112.56
									105.09
									90.55
									85.18
									119.62
									111.07
									129.52
									112.56
									120.47
									92.06
									112.04
									64.87
									124.09
									153.57
									124.03
									66.53
									162.88
									93
									135.12
									99.7
									97.57
									124.55
									135.01
									163.99
									168.4
									73.97
									64.87
									136.56
									84.59
									127.78
									61.54
									86.87
									149.35
									96.15
									104.61
