# Supplementary material for: Secondary metabolites of Hülle cells mediate protection of fungal reproductive and overwintering structures against fungivorous animals
Source: eLife. 2021 Oct 12;10:e68058. doi: 10.7554/eLife.68058 (PMC8510581; doi:10.7554/eLife.68058)
Supplement: Figure 5—source data 2. [file elife-68058-fig5-data2.xlsx]

## Sheet: source data 2
Fig. 5c: Ascospore quantification after 10 days
Sexual 10 days
10 Cleistothecia were broken in 100ul buffer for counting with 3 biological and technical replicates
concentration (E6)
	wt	∆mdpG	∆mdpC	∆mdpL	∆xptB
Bio-rp1	4.58	3.543	1.623	1.643	2.137
	3.787	3.763	1.61	1.96	1.297
	4.74	3.75	1.63	1.717	1.943
Bio-rp2	3.89	5.395	1.543	1.803	1.49
	3.88	4.043	1.96	1.373	1.98
	4.903	5.853	1.593	1.587	2.36
Bio-rp3	5.55	5.41	1.613	2.063	1.143
	5.3	4.929	1.6	1.88	1.223
	4.18	5.193	1.75	1.653	1.21
