# Supplementary material for: Secondary metabolites of Hülle cells mediate protection of fungal reproductive and overwintering structures against fungivorous animals
Source: eLife. 2021 Oct 12;10:e68058. doi: 10.7554/eLife.68058 (PMC8510581; doi:10.7554/eLife.68058)
Supplement: Figure 5—source data 3. [file elife-68058-fig5-data3.xlsx]

## Sheet: source data 3
	Fig. 5d: Cleistothecia quantification after 10 days
		wt	∆mdpG	∆mdpF	∆mdpC	∆mdpL	∆mdpD	∆xptA	∆xptB	∆xptC
	Bio-rp1	401	430	423	517	498	392	419	495	327
	Bio-rp2	439	377	414	353	583	354	395	354	375
	Bio-rp3	368	259	411	266	579	434	419	512	319
	Bio-rp4	370	384	351	215	650	303	335	475	401
	Bio-rp5	303	352	415	281	643	355	366	442	376
	Cleistothecia amount / 0.2 cm2
	5 biological replicates
