# Supplementary material for: Secondary metabolites of Hülle cells mediate protection of fungal reproductive and overwintering structures against fungivorous animals
Source: eLife. 2021 Oct 12;10:e68058. doi: 10.7554/eLife.68058 (PMC8510581; doi:10.7554/eLife.68058)
Supplement: Figure 5—source data 4. [file elife-68058-fig5-data4.xlsx]

## Sheet: source data 4
	Fig. 5e: Cleistothecia diameter of A. nidulans wildtype grown on paper discs loaded with mdp/xpt deletion strain SMs.
	diameter/µm
	wt		∆mdpG		∆mdpF		∆mdpC		∆mdpL		∆mdpD		∆xptA		∆xptB		∆xptC		MeOH
	33.12		28.66		22.2		19.58		21.96		27.67		31.37		24.32		21.6		34.61
	34.83		29.5		32.51		18.66		28.72		30.56		29.66		44.1		27.92		30.93
	32.93		21.33		10.06		19.84		27.32		39.7		26.92		26.34		30.06		34.15
	29.02		28.72		36.7		10.51		15.38		36.49		31.96		41.5		30.06		28.82
	37.74		26.73		34.13		17.49		39.06		21.04		29.43		40.83		33.73		26.41
	36.49		18.16		33.34		10.88		33.22		38.19		19.67		28.62		12.44		35.52
	36.24		38.19		36.41		15.86		40.25		34.03		35.22		32.25		27.19		15.16
	25.78		15.16		27.92		18.99		42.48		37.03		38.53		14.51		27.82		26.34
	31.01		36.78		29.66		10.98		36.33		24.18		25.35		32.44		28.34		23.68
	30.21		28.82		35.86		17.2		30.93		24.63		24.14		21.6		17.36		13.58
	36.98		30.11		16.25		15.86		30.04		35.84		31.82		38.46		28.18		35.51
	28.18		16.66		31.01		16.28		34.15		35.22		15.86		27.53		17.36		34.73
	23.97		27.19		11.34		15.86		31.5		35.22		26.41		26.04		29.89		24.37
	30.21		34.94		35.84		27.53		28.72		27.19		31.52		24.56		22.68		10.06
	36.09		30.17		29.43		21.36		41.04		26.24		29.29		37.1		25.29		29.5
	35.46		32.07		31.71		17.36		19.67		30.06		8.12		39.06		30.36		16.59
	24.99		39.16		18.99		10.56		24.99		27.73		30.93		23.08		19.61		33.73
	18.13		18.13		23.39		16.7		33.14		38.83		27.53		30.93		24.88		28.16
	40.55		22.2		29.11		13.66		37.83		33.08		16.28		20.6		19.67		32.56
	13.66		18.23		17.36		7.69		27.92		26.75		40.55		22.27		29.11		38.65
	39.7		24.88		30.21		11.34		22.43		28.7		24.56		32.86		42.04		30.19
	21.17		31.37		30.21		10.06		33.32		11.34		25.69		31.01		29.02		35.46
	31.68		28.82		31.5		17.75		10.12		24.9		11.93		11.34		24.18		23.61
	34.55		28.16		17.2		11.93		11.49		32.56		25.35		27.19		27.67		39.48
	13.91		26.34		35.51		13.87		33.49		28.16		45.88		23.08		14.31		42.48
	31.71		33.08		29.66		17.36		25.29		20.13		24.97		33.19		36.73		36.33
	39.34		24.99		29.66		18.35		26.24		18.63		23.42		32.51		18.87		27.53
	31.82		11.34		21.33		20.13		16.28		22.68		29.94		33.34		36.09		38.47
	34.94		26.04		18.16		16.28		31.68		22.5		29.5		31.71		28.72		27.01
	15.53		8.33		34.99		23.39		21.44		26.5		15.16		35.84		23.97		32.86
	40.76		23.97		19.67		16.25		36.83		14.51		26.41		31.82		43.52		31.01
	31.37		19.23		24.37		20.13		43.2		51.38		36.27		32.93		36.27		37.88
	31.71		28.16		30.21		18.66		24.18		36.28		12.49		16.66		31.82		29.43
	21.6		48.3		22.68		19.84		25.69		25.8		23.68		29.02		32.65		33.49
	43.85		25.95		33.22		9.83		37.98		20.71		39.06		36.97		16.87		26.04
	32.02		26.67		29.13		28.16		37.98		40.38		21.96		27.92		25.78		33.32
	22.43		21.89		37.21		21.04		25.29		27.92		36.09		17.75		21.89		34.83
	27.67		24.56		39.64		16.59		24.35		45.66		23.49		37.83		21.44		33.49
	32.51		39.83		20.6		18.66		32.95		38.16		27.82		28.18		21.17		31.71
	17.49		24.32		41.6		21.33		34.83		35.52		21.6		41.65		27.67		23.49
	19.46		31.82		26.92		10.06		36.28		32		33.19		38.83		20.29		36.41
	25.64		18.13		27.19		13.91		29.66		19.61		32		19.61		18.13		40.04
	31.71		10.51		28.4		8.33		37.71		22.83		21.99		45.28		20.96		27.82
	37.15		13.87		38.67		10.51		41.17		29.13		37.98		38.46		29.58		26.24
	39.98		32.56		32.86		19.67		44.51		17.2		29.89		40.98		20.24		27.73
	38.46		30.19		27.92		15.08		48.3		18.87		22.68		34.4		24.9		26.15
	21.04		25.82		31.96		16		17.49		23.39		30.19		33.12		28.16		17.36
	26.41		20.49		33.14		14.82		42.08		31.82		21.99		35.52		38.19		44.16
	23.39		22.9		23.39		20.71		30.95		13.66		43.32		34.94		23.85		41.5
	34.02		35.46		18.63		13.37		35.65		16.87		18.99		32.25		29.64		34.99
	28.72		10.67		32.25		16		27.73		24.88		34.73		23.39		24.88		36.09
	12.44		27.53		29.58		21.44		22.83		26.15		44.51		37.58		12.84		35.09
	33.39		29.64		42.67		13.66		23.97		17.36		26.24		21.47		24.88		34.15
	21.04		37.83		36.84		12.84		20.71		22.5		41.49		36.98		34.03		31.01
	23.49		21.47		37.83		15.75		29.02		10.88		31.01		25.8		33.95		23.85
	34.02		18.99		20.13		7.47		18.1		29.89		19.61		38.19		20.49		39.83
	24.56		21.96		23.03		9.11		27.32		24.9		29.5		22.83		22.4		22.6
	10.98		28.16		10.88		19.84		24.37		21.12		21.17		22.9		23.97		30.77
	37.98		27.92		30.79		12.16		15.75		33.19		26.92		19.08		18.23		38.19
	25.64		23.68		36.27		10.51		34.88		10.67		26.34		32.86		22.9		26.24
	20.52		40.17		17.88		23.39		39.06		18.16		24.99		20.38		33.95		23.85
	39.64		24.88		14.51		18.1		27.53		36.24		26.86		27.32		37.74		35.86
	31.37		27.19		28.18		21.04		21.57		35.52		13.37		29.64		32.25		21.99
	38.78		26.39		28		7.16		24.32		29.5		45.57		15.86		25.78		38.93
	36.7		21.17		33.73		16.87		27.73		15.08		19.84		21.04		29.64		32
	40.84		22.68		28		13.66		36.49		35.33		19.67		29.29		31.15		21.57
	37.74		10.67		37.32		19.61		23.68				21.96		28		29.43		38.12
	24.56		33.39		30.71		22.2		33.73				35.33		31.37		27.67		30.95
	8.33		15.16		21.89		21.99		21.76				21.01		13.66		22.9		27.53
	29.29		30.19		42.59		17.2		29.94				35.22		21.99		37.88		33.9
	28.66		29.11		31.37		16.87		26.67				26.34		25.44		20.52		30.54
	33.9		18.87		32.09		22.2		21.6				20.04		39.35		38.83		43.98
	18.63		42.24		10.12		15.16		21.6				15.38		12.89		29.64		18.66
	26.34		21.12		22.8		16.87		32.44				21.33		15.16		24.56		18.13
	50		20.04		31.1		8.6		25.82				36.97		21.6		19.61		40.25
	13.02		26.34		23.42		25.64		29.5				12.84		33.9		16.87		24.18
	29.02		11.54		32.72		23.03		28.82				35.51		21.57		17.49		24.56
	31.82		32.65		34.83		8.33		22.2				32.65		7.69		26.92		31.01
	39.83		28.06		23.68		27.92		20.71				35.86		8.12		30.21		35.22
	31.52		31.66		28.72		16.66		28.7				31.59		23.08		31.1		34.35
	14.31		46.06		29.89		12.16		36.24				16.28		24.56		36.41		33.9
	35.52		29.13		29.11		13.37		36.24				34.73		31.01		18.13		33.14
	30.21		39.16		20.04		16.59		24.88				31.96		24.88		8.33		21.17
	37.98		23.3		36.41		17.75		26.73				30.21		15.08		13.02		40.55
	40.76		32.25		26.5		16		16.66				38.41		16		28.4		49.08
	42.95		36.27		34.4		14.35		43.14				31.52		21.96		23.42		16.66
	21.36		19.32		32.56		35.78		34.61				33.19		33.14		16.59		30.77
	36.98		32.16		35.33		12.84		38.19				35.78		18.16		22.63		43.77
	29.66		34.08		22.5		23.08		42.91				16.66		10.06		25.69		36.2
	56.81		34.73		33.95		15.08		25.64				26.73		44.81		22.83		37.32
	43		21.99		10.67		10.98		34.94				32.86		26.41		33.22		34.47
	25.69		38.24		33.22		15.38		34.73				31.59		34.83		43.05		29.75
	31.96		24.9		30.06		14.35		38.65				26.24		55.89		34.74		23.49
	28.4		31.37		29.11		9.83		32.25				50.99		42.63		31.15		26.04
	27.32		20.49		41.42		30.54		21.6				28.62		38.16		27.73		40.15
	21.01		29.35		21.47		10.56		30.06				34.83		52.1		31.5		37.98
	21.99		25.69		26.15		8.33		18.99				22.2		34.94		37.58		42.31
	44.85		29.5		21.17		9.11		45.57				15.75		33.95		23.42		18.66
	42.88		37.21		31.15		13.02		27.26				26.04		25.64		32.65		29.11
	30.93		34.15		28.72		23.08		19.84				25.44		34.61		37.98		36.33
	17.2		33.48		27.82		14.31		24.07				31.1		34.83		30.32		30.17
	29.64		22.9		13.49		9.11		39.22				35.52		15.16		29.94		32
	47.7		26.34		28.18		23.03		22.6				28.72		32.25		36.24		21.99
	29.13		18.1		26.5		17.2		11.93				28.82		51.49		12.16		24.32
	29.29		34.99		25.69		18.13		18.63				31.71		19.58		30.32		36.7
	34.7		29.66		29.5				17.49				34.99		40.76		21.6		23.97
	24.99		10.56		37.52				34.74				32.86		27.67		21.89		44.46
	34.83		34.83		23.85				31.15				29.64		32.72		12.44		28.16
	34.02		8.6		25.98				25.69				38.53		48.38		36.7		42.63
	35.65		9.83		39.35				33.32				27.19		41.72		22.68		34.99
	37.21		33.73		18.16				38.19				32.95		27.53		33.32		17.2
	37.71		25.82		35.65				36.33				26.92		31.68		37.32		36.27
	39.68		24.37		25.44				15.27				33.48		27.82		31.01		27.92
	49.11		34.73		31.71				23.39				28.62		26.04		25.78		43.54
	13.37		13.66		39.6				36.41				26.24		29.66		34.35		29.64
	21.96		25.8		13.02				26.69				25.8		26.67		27.26		36.78
	38.47		30.21		18.9				12.44				40.04		9.05		24.32		28.62
	47.38		25.95		41.05				35.78				19.23		30.32		18.16		24.18
	31.01		27.92		36.49				24.81				27.19				22.9		19.84
	30.06		33.49		27.42				37.52				37.47				12.49		45.28
	34.83		28.4		13.66				9.83				21.47				15.75		41.5
	36.7		22.68		30.77				28				35.86				32.49		20.38
	21.47		8.33		10.98				18.35				21.33				15.08		27.67
	35.46		10.12		17.59				38.83				37.98				16.28		37.74
	14.35		25.69		22.5				41.2				17.88				21.33		15.75
	28.66		9.83		23.97				19.61				28.82				15.86		19.23
	45.32		18.87		31.5				47.24				23.3				19.67		28.18
	40.76		14.35		27.19				24.9				32.65				31.06		31.15
	43.32		31.1		49.25				23.97				26.98				22.68		10.67
	40.76		38.83		16.87				28.82				25.62				20.49		11.78
	21.17		31.96		15.27				40.62				32.86				22.6		20.96
	34.15		8.8		18.99				39.16				37.26				32.51		32.39
	29.5		21.89		23.42				14.51				25.17				32.09		35.52
	28.72		24.88		41.04				25.29				21.17				27.42		24.35
	35.78		31.15		41.55				11.54								35.6		23.3
	38.83		32.86		28.66				24.56								25.8		25.78
	47.38		29.89		24.63				38.46								26.15		22.5
	32.95		21.33		32.44				34.08								37.33		40.15
	41.83		26.67		27.67				26.41								26.92		40.32
	33.41		22.5		35.65				27.53								28.34		33.95
	36.7		20.49		22.2				19.84								24.99		38.53
	11.34		25.69		35.86				18.63								23.49		29.71
	38.16		30.51		36.84				30.71								29.58		28.82
	34.99		11.54		32				11.34								18.16		30.19
	25.69		33.49		31.52				27.19								9.54		37.83
	31.15		28.72		17.2				21.47								30.21		26.41
	30.93		18.1		35.26				34.28								37.26		42.26
	38.46		26.04		26.34				27.26								22.27		26.41
	33.49		10.98		35.76				32.44								18.66		36.98
	39.98		24.9		23.03				24.07								29.5		19.23
	31.71		21.17		21.25				28.82								10.88		34.61
	34.94		13.87		35.86				26.41								12.44		35.22
	34.35		19.84		19.67				22.83								20.13		27.82
	24.35		22.9		22.98				20.38								27.34		34.43
	34.83		41.16		20.49				46.51								23.39		18.41
	35.78		31.01		37.88				35.84								16.25		13.02
	29.35		30.32		24.18				29.89								19.84		43.58
	28.4		14.35		30.93				35.86										27.53
	12.07		21.76		40.55				21.25										30.19
	50.18		33.73		35.22				32.95										46.27
	43		28.16		21.47				20.04										28.72
	23.49		31.15		23.39				15.27										21.12
	30.21		21.89		35.46				21.99										14.35
	21.6		27.92		10.06				31.37										35.65
	26.41		24.9		27.53				26.92										32.72
	26.41		18.16		8.33				32.51										18.35
	50.14		30.17		31.71				21.99										30.17
	37.58		23.39		36.97				29.66										17.36
			24.18		39.7				43.05										25.8
			23.08		25.8				10.06										24.88
			10.67		20.13				31.5										20.49
			11.34		34.83				43.85										40.55
			18.9		27.34				35.31										27.19
			18.35		21.99				30.77										27.19
			14.51		31.01				22.43										37.03
			22.68		41.16				35.46										21.96
			33.48		37.71				40.83										28
			26.04		33.48				22.68										21.96
			19.84		31.15				27.15										23.68
			31.01		22.8				25.62										39.48
			36.41		38.41				25.35										35.84
			29.64		33.88				34.55										38.46
			23.08		21.89				18.16										26.75
			16.66		35.86				32.25										29.66
			37.71		34.83				27.75										35.65
			24.14		27.67				34.15										31.52
			13.02		35.46				16.66										34.35
			23.85		31.1				13.58										25.69
			30.06		28.16				34.15										37.15
			22.68		29.29				24.35										40.55
			33.08		28.34				40.04										12.89
			14.51		41.5				12.16										25.8
			30.71		30.34				44.86										35.86
			32.86		19.67				21.12										35.22
			27.19		33.88				42.84										29.64
			27.53		31.71				10.67										31.1
			21.17		27.53														46.06
			34.47		18.23														31.01
			39.16		27.69														39.48
			34.13		37.26														35.51
			31.66		29.29														37.98
			25.17		38.53														27.92
			24.32		37.33														40.04
			23.08		16														36.7
			21.96		37.46														27.67
			19.58		36.28														42.91
			29.29		39.83														31.1
			29.11		36.98														36.2
			34.35		43.2														30.56
			18.35		28.7														20.04
			32.02		28.72														31.39
			33.14		20.52														14.35
			31.71		35.78														36.78
			13.91		35.31														40.25
			29.66		27.67														27.53
			32.65		28.88														44.2
			38.24		27.19														13.02
			38.46		24.88														33.22
					27.92														28
					34.99														24.56
					35.46														10.88
					17.75														16.28
					25.69														12.84
					20.71														29.66
					40.32														35.86
					30.93														30.93
					32.72														39.25
					30.51														30.93
					31.71														42.93
					29.29														12.49
					36.83														21.76
					36.98														29.29
					28.8														31.5
					50.14														33.39
					35.78														34.35
					21.33														32.09
					31.01														33.22
					40.83
					13.91
					43.75
					27.82
					27.26
					39.16
					46.79
					27.92
					44.16
					30.93
					9.83
					23.68
					17.49
					32.44
					33.48
					31.01
					17.36
					41.82
					26.98
					32.56
					26.92
					32.44
					18.99
					21.04
					10.67
					28.24
					27.92
					34.99
					24.37
					26.34
					25.64
					39.34
					20.38
					36.78
					20.13
					23.39
					15.38
					27.26
					10.67
					23.08
					8.6
					20.71
					24.18
