# Supplementary material for: Secondary metabolites of Hülle cells mediate protection of fungal reproductive and overwintering structures against fungivorous animals
Source: eLife. 2021 Oct 12;10:e68058. doi: 10.7554/eLife.68058 (PMC8510581; doi:10.7554/eLife.68058)
Supplement: Figure 6—figure supplement 1—source data 1. [file elife-68058-fig6-figsupp1-data1.xlsx]

## Sheet: source data 1
	Figure 6-supplement figure 1a: Effect of secondary metabolites on perithecium formation.
	Halo diameter/cm
		Bio-rp1					Bio-rp2
		tech-rp1		tech-rp2			tech-rp1		tech-rp2
	wt	1.1	1	1	1		1	1.1	1	1
	∆mdpC	1.8	1.6	2.1	2		2	2	1.8	1.5
	∆mdpL	1.3	1.4	1.3	1.5		1.3	1.2	1.2	1.2
	∆mdpD	1.3	1.2	1.1	1.2		1.5	1.4	1.2	1.2
	2 biological and technical repliactes
