# Supplementary material for: Secondary metabolites of Hülle cells mediate protection of fungal reproductive and overwintering structures against fungivorous animals
Source: eLife. 2021 Oct 12;10:e68058. doi: 10.7554/eLife.68058 (PMC8510581; doi:10.7554/eLife.68058)
Supplement: Figure 6—figure supplement 1—source data 2. [file elife-68058-fig6-figsupp1-data2.xlsx]

## Sheet: source data 2
Figure 6-supplement figure 1b: Effect of secondary metabolites on vegetative growth of S. macrospora.
	tech. replicates	day 1	day 2	day 3	day 4	day 5-7	average growth/per day (cm)
wt extract (bio-rp 1)	1	1.2	1.5	1.3	0.9	1.4	1.26
	2	1	0.9	1.5	1.1	0.93	1.086
	3	0.9	0.8	0.8	0.8	1.2	0.9
wt extract (bio-rp 2)	1	1	1	1.6	1	1.17	1.154
	2	1.1	0.8	1.2	0.8	1.26	1.032
	3	1.1	0.9	1	1.6	1.3	1.18
wt extract (bio-rp 3)	1	1.1	1	1.1	1	1.33	1.106
	2	1.2	1	1.1	1	1.03	1.066
	3
	tech. replicates	day 1	day 2	day 3	day 4	day 5-7	average growth rate/day
DmdpC extract (bio-rp 1)	1	0.9	0.9	1.2	1.2	1.3	1.1
	2	0.8	0.8	0.8	0.6	0.97	0.794
DmdpC extract (bio-rp 2)	1	0.7	0.9	1.1	1	1.17	0.974
	2	0.9	0.8	0.9	0.8	1.06	0.892
DmdpC extract (bio-rp 3)	1	1.1	0.8	1.6	1.1	1	1.12
	2	1	0.9	1	1.1	0.97	0.994
	tech. replicates	day 1	day 2	day 3	day 4	day 5-7	average growth rate/day
MeOH (bio-rp 1)	1	1.3	1.1	1.3	1.2	1.17	1.214
MeOH (bio-rp 2)	2	2.4	1.4	1.2	1.5	1.4	1.58
MeOH (bio-rp 3)	3	1.2	1	1.1	1.5	1.4	1.24
