# Supplementary material for: Secondary metabolites of Hülle cells mediate protection of fungal reproductive and overwintering structures against fungivorous animals
Source: eLife. 2021 Oct 12;10:e68058. doi: 10.7554/eLife.68058 (PMC8510581; doi:10.7554/eLife.68058)
Supplement: Figure 8—figure supplement 2—source data 1. [file elife-68058-fig8-figsupp2-data1.xlsx]

## Sheet: source data 1
Figure 8-supplement figure 1: The final SM products of the mdp/xpt cluster repel fungal predators.
			0 hours								2 hours								4 hours								6 hours								8 hours										0 hours				2 hours
Tenebrio molitor		plate	∆mdpC	vs	mdpC com		∆mdpG	vs	mdpG com		∆mdpC	vs	mdpC com		∆mdpG	vs	mdpG com		∆mdpC	vs	mdpC com		∆mdpG	vs	mdpG com		∆mdpC	vs	mdpC com		∆mdpG	vs	mdpG com		∆mdpC	vs	mdpC com		∆mdpG	vs	mdpG com				∆mdpC	vs	∆mdpG		∆mdpC
	Bio-rp1	1	0		0		0		0		4		2		0		8		4		2		0		7		5		2		0		7		5		2		0		5				0	10	0		0
3 biological replicates		2	0		0		0		0		0		8		5		0		0		8		5		0		0		6		5		0		0		8		6		0				0	10	0		0
9 technical replicates		3	0		0		0		0		2		1		0		7		4		0		0		7		5		0		0		6		4		0		1		5				0	10	0		0
		4	0		0		0		0		5		1		0		7		6		1		0		5		5		2		0		3		6		1		0		1				0	10	0		0
		5	0		0		0		0		2		5		0		0		3		5		0		0		3		1		0		0		3		3		1		0				0	10	0		2
		6	0		0		0		0		5		2		5		0		6		1		4		2		6		2		4		1		6		2		4		1				0	10	0		1
		7	0		0		0		0		4		1		6		0		3		1		6		0		3		2		7		0		7		0		6		0				0	10	0		2
		8	0		0		0		0		5		0		6		1		5		0		6		1		5		0		6		2		5		0		6		2				0	10	0		1
		9	0		0		0		0		0		0		0		2		0		0		0		1		0		0		1		4		0		0		0		2				0	10	0		0
	Bio-rp2	1	0		0		0		0		7		0		3		2		5		0		3		3		4		0		1		1		5		0		2		1				0	10	0		0
		2	0		0		0		0		3		3		1		5		2		2		0		8		3		3		1		1		3		0		0		4				0	10	0		1
		3	0		0		0		0		1		6		3		1		1		4		1		2		1		4		5		1		1		3		4		0				0	10	0		4
		4	0		0		0		0		1		2		4		0		0		3		3		0		0		4		1		6		0		1		2		1				0	10	0		0
		5	0		0		0		0		7		2		4		0		2		1		6		0		2		1		6		0		5		1		5		0				0	10	0		2
		6	0		0		0		0		6		1		1		0		4		2		3		0		1		3		1		5		2		5		2		4				0	10	0		0
		7	0		0		0		0		4		0		1		6		1		0		0		9		0		3		0		7		1		0		0		8				0	10	0		7
		8	0		0		0		0		7		0		0		3		7		0		0		6		5		1		0		4		4		0		0		9				0	10	0		0
		9	0		0		0		0		5		0		1		7		5		0		0		7		7		0		0		10		7		0		0		10				0	10	0		0
	Bio-rp3	1	0		0		0		0		6		0		0		9		2		0		0		1		4		2		0		5		2		1		2		7				0	10	0		0
		2	0		0		0		0		10		0		4		0		9		0		3		0		10		0		5		0		8		1		5		0				0	10	0		0
		3	0		0		0		0		1		9		0		8		0		7		3		4		1		8		1		4		0		8		4		4				0	10	0		1
		4	0		0		0		0		2		1		3		0		2		0		2		0		2		1		2		1		2		1		0		1				0	10	0		0
		5	0		0		0		0		1		6		7		0		0		9		9		0		1		8		4		1		1		8		6		3				0	10	0		1
		6	0		0		0		0		2		2		0		0		1		1		0		0		2		1		0		2		2		0		0		3				0	10	0		10
		7	0		0		0		0		0		0		0		0		0		0		1		0		0		0		1		0		1		0		1		0				0	10	0		2
		8	0		0		0		0		10		0		5		1		10		0		2		1		9		0		3		1		9		1		1		1				0	10	0		1
		9	0		0		0		0		6		2		0		1		6		1		0		2		5		1		0		1		6		3		0		1				0	10	0		3
			30 min								2 hours								4 hours								6 hours								8 hours								10 hours
Folsomia candida		plate	∆mdpC	vs	mdpC com		∆mdpG	vs	mdpG com		∆mdpC	vs	mdpC com		∆mdpG	vs	mdpG com		∆mdpC	vs	mdpC com		∆mdpG	vs	mdpG com		∆mdpC	vs	mdpC com		∆mdpG	vs	mdpG com		∆mdpC	vs	mdpC com		∆mdpG	vs	mdpG com		∆mdpC	vs	mdpC com		∆mdpG	vs	mdpG com
	Bio-rp1	1	0		0		0		0		5		1		0		0		1		3		2		4		4		1		3		0		16		1		7		0		12		1		7		2
3 biological replicates		2	0		0		0		1		1		4		0		1		2		2		4		2		9		7		2		0		24		5		8		0		14		0		18		0
4 technical replicates		3	0		1		0		0		0		1		1		1		9		2		4		0		3		1		5		0		14		1		12		1		20		4		7		1
		4	0		0		0		0		2		0		0		1		6		1		1		0		6		1		9		3		9		1		15		3		20		1		8		0
	Bio-rp2	1	0		0		0		1		1		1		4		0		1		0		8		4		7		2		9		3		7		3		17		1		7		3		16		4
		2	0		0		0		0		3		2		1		1		1		1		14		1		14		3		3		0		7		7		13		1		18		0		7		3
		3	0		0		0		1		0		1		5		1		8		5		0		1		7		4		13		1		19		2		5		3		14		3		15		0
		4	0		0		1		0		3		0		2		4		6		4		8		4		5		3		12		2		6		2		18		4		8		3		18		4
	Bio-rp3	1	1		1		1		1		2		13		0		3		5		10		0		3		3		12		1		7		3		4		10		3		19		4		4		5
		2	8		1		2		2		5		4		2		3		16		9		14		3		10		8		12		0		10		3		20		1		15		5		15		2
		3	3		1		0		1		13		3		4		4		12		5		5		2		9		7		20		1		16		7		12		3		10		3		20		3
		4	8		3		0		1		5		6		0		2		12		12		3		3		6		5		3		0		13		7		5		3		17		5		2		4
Trichorhina tomentosa		plate	∆mdpC	vs	mdpC com		∆mdpG	vs	mdpG com		∆mdpC	vs	mdpC com		∆mdpG	vs	mdpG com		∆mdpC	vs	mdpC com		∆mdpG	vs	mdpG com		∆mdpC	vs	mdpC com		∆mdpG	vs	mdpG com		∆mdpC	vs	mdpC com		∆mdpG	vs	mdpG com		∆mdpC	vs	mdpC com		∆mdpG	vs	mdpG com
	Bio-rp1	1	3		1		1		0		3		0		5		0		6		0		7		0		5		1		7		0		5		1		3		1		6		1		3		1
3 biological replicates		2	2		1		3		0		3		0		0		2		5		0		8		0		4		0		3		0		4		0		5		0		4		1		6		1
4 technical replicates		3	3		1		2		1		2		0		8		0		4		0		1		3		7		0		8		0		4		0		8		0		5		0		2		2
		4	1		0		3		0		6		0		5		1		6		1		8		0		7		0		7		0		6		0		5		0		3		1		4		2
	Bio-rp2	1	4		1		0		2		1		1		6		0		4		2		0		2		0		1		7		0		2		3		2		1		0		3		4		2
		2	3		2		4		0		5		0		1		4		1		0		6		0		4		0		7		1		2		0		5		0		6		0		3		0
		3	6		0		3		3		2		1		5		0		5		0		4		3		2		1		4		0		3		0		5		1		2		0		4		0
		4	4		2		4		0		4		1		1		3		0		1		7		1		3		3		0		5		1		0		4		2		0		4		3		1
	Bio-rp3	1	6		1		3		2		1		4		3		3		7		1		0		2		0		5		5		1		5		0		2		1		0		5		5		0
		2	4		5		3		3		4		3		1		4		5		4		4		2		2		3		1		3		6		2		5		1		1		2		2		0
		3	4		4		2		3		4		5		4		2		3		4		0		5		5		4		4		2		1		2		2		4		5		4		4		2
		4	1		6		3		4		7		0		4		3		1		5		5		2		6		1		2		3		0		6		5		1		6		1		1		1
[truncated: 11 more columns]
