# Supplementary material for: Secondary metabolites of Hülle cells mediate protection of fungal reproductive and overwintering structures against fungivorous animals
Source: eLife. 2021 Oct 12;10:e68058. doi: 10.7554/eLife.68058 (PMC8510581; doi:10.7554/eLife.68058)
Supplement: Figure 8—figure supplement 3—source data 1. [file elife-68058-fig8-figsupp3-data1.xlsx]

## Sheet: source data 1
Figure 8-supplement figure 2: Toxicity of secondary metabolites to T. tomentosa and F. candida.
F. candida					T. tomentosa
		Number of living F. candida				Number of living T. tomentosa
	replicates	Day 0	Day 5			Day 0	Day 5
control (no SM)	1	8	0		control (no SM)	4	4
	2	4	0		DmdpG	4	4
	3	3	3		wt (AGB552)	4	4
	4	4	4		DmdpC	4	4
	5	1	1
	6	2	2
		Number of living F. candida
	replicates	Day 0	Day 5
DmdpG	1	10	8
	2	4	4
	3	3	3
	4	8	5
	5	1	1
		Number of living F. candida
	replicates	Day 0	Day 5
wt (AGB552)	1	12	11
	2	6	6
	3	6	3
	4	10	3
	5	6	6
	6	4	3
		Number of living F. candida
	experiments	Day 0	Day 5
DmdpC	1	12	2
	2	6	3
	3	8	0
	4	6	4
	5	7	0
	6	4	4
