# Supplementary material for: Secondary metabolites of Hülle cells mediate protection of fungal reproductive and overwintering structures against fungivorous animals
Source: eLife. 2021 Oct 12;10:e68058. doi: 10.7554/eLife.68058 (PMC8510581; doi:10.7554/eLife.68058)
Supplement: Figure 8—source data 1. [file elife-68058-fig8-data1.xlsx]

## Sheet: source data 1
Figure 8b: Eaten areas of sexual mycelium by T. tomentosa after 6 days
T. tomentosa
	replicates	eaten areas (%) after 6 days			replicates	eaten areas (%) after 6 days			tech. replicates	eaten areas (%) after 6 days
wt (AGB552) (experiment 1)	1	0		DmdpG (experiment 1)	1	0		DmdpC (experiment 1)	1	6.00069
	2	0			2	0			2	0
	3	1.50924			3	4.82645			3	1.397
	4	1.99275			4	5.01209			4	0
	5	4.95165			5	21.4738			5	5.76584
	6	0			6	8.79468			6	1.61975
	7	0			7	8.54602			7	2.64376
	8	0			8	15.5474			8	0
	9	0			9	4.7073			9	4.12882
	10	1.0076			10	6.39095			10	5.89881
wt (AGB552) (experiment 2)	1	0		DmdpG (experiment 2)	1	0		DmdpC (experiment 2)	1	0
	2	2.56778			2	0			2	14.8423
	3	0			3	7.02346			3	0
	4	3.98572			4	18.6823			4	17.6709
	5	0			5	11.9049			5	0
	6	0			6	7.01092			6	13.2307
