# Supplementary material for: Secondary metabolites of Hülle cells mediate protection of fungal reproductive and overwintering structures against fungivorous animals
Source: eLife. 2021 Oct 12;10:e68058. doi: 10.7554/eLife.68058 (PMC8510581; doi:10.7554/eLife.68058)
Supplement: Figure 8—source data 2. [file elife-68058-fig8-data2.xlsx]

## Sheet: source data 2
Figure 8c: Eaten cleistothecia by the predators T. tomentosa and F. candida.
T. tomentosa
	replicates	not eaten cleistothecia of 10 (after 24h)			replicates	not eaten cleitothecia of 10 (after 24h)
wt (AGB552) (experiment 1)	1	10		DmdpG (experiment 1)	1	9
	2	10			2	7
	3	10			3	9
	4	8			4	10
	5	9			5	10
	6	8			6	10
wt (AGB552) (experiment 2)	1	10		DmdpG (experiment 2)	1	10
	2	5			2	10
	3	10			3	10
	4	10			4	9
	5	10			5	9
	6	10			6	10
F. candida
	replicates	not eaten cleitothecia of 10 (after 24h)			replicates	not eaten cleitothecia of 10 (after 24h)
wt (AGB552) (experiment 1)	1	9		DmdpG (experiment 1)	1	8
	2	9			2	4
	3	7			3	8
	4	6			4	4
	5	7			5	9
	6	9			6	9
wt (AGB552) (experiment 2)	1	10		DmdpG (experiment 2)	1	0
	2	8			2	0
	3	6			3	1
	4	4			4	1
	5	5			5	1
	6	2			6	0
wt (AGB552) (experiment 3)	1	5		DmdpG (experiment 3)	1	1
	2	5			2	1
	3	8			3	0
	4	3			4	0
	5	2			5	1
	6	2			6	7
wt (AGB552) (experiment 4)	1	7		DmdpG (experiment 4)	1	7
	2	4			2	1
	3	9			3	0
	4	7			4	0
	5	6			5	0
	6	7			6	0
